# Supplementary material for: Behaviours involved in the role of victim and aggressor in bullying: Relationship with physical fitness in adolescents
Source: PLoS One. 2021 Nov 4;16(11):e0259087. doi: 10.1371/journal.pone.0259087 (PMC8568104; doi:10.1371/journal.pone.0259087)
Supplement: S1 File — (XLSX) [file pone.0259087.s001.xlsx]

## Sheet: Hoja1
edad	Sex	talla	peso	IMC	sit-up	sit-reach	horizontal jump	course navette	Handgrip best hand	strenght	EBIPQ_1	EBIPQ_2	EBIPQ_3	EBIPQ_4	EBIPQ_5	EBIPQ_6	EBIPQ_7	mvicbull	EBIPQ_8	EBIPQ_9	EBIPQ_10	EBIPQ_11	EBIPQ_12	EBIPQ_13	EBIPQ_14	agrebull
12.9966	Chico	158	51.8	20.7499	17	9	140	6.04	21.5	-0.73	0	1	1	0	0	2	0	0.571429	0	1	0	0	0	0	0	0.142857
13.9904	Chico	148	64.2	29.3097	21	11	140	1.5	18.4	-0.64
13.9932	Chico	168	63	22.3214	29	15	150	6.5	21.2	0	0	0	0	0	1	0	0	0.142857	0	0	0	0	0	0	0	0
13.9986	Chico	169	75.7	26.5047	25	9	170	3.25	35.5	0.56	1	2	1	1	0	0	1	0.857143	1	2	0	1	0	0	0	0.571429
14.9925	Chico	172	55.9	18.8953	20	10	223	10.3	35.8	0.79	0	0	0	0	0	0	0	0	0	0	0	0	0	0	0	0
15.9918	Chico	160	101.9	39.8047	23	19	102	3	22.7	-0.7	0	1	1	0	0	0	0	0.285714	0	1	1	0	0	0	0	0.285714
15.9973	Chico	157	66.6	27.0194	27	20	150	3.5	25.5	0.07	0	0	1	0	0	0	0	0.142857	0	0	0	0	0	0	0	0
16.9938	Chico	169	74.3	26.0145	24	11	123	7.04	39.2	0.23	0	0	0	0	0	0	0	0	0	0	0	0	0	0	0	0
16.9993	Chico	180	72.1	22.2531	33	18	225	12.1	44.4	1.86	0	0	0	0	0	0	0	0	0	1	0	0	1	0	0	0.285714
18.0151	Chico					15
18.0233	Chico				26	32	195	5.3
18.0534	Chico	174	119.1	39.3381	14	33	123	2.13	31.8	-0.62	0	1	0	0	0	0	0	0.142857	0	0	0	0	0	0	0	0
18.0952	Chico	178	64.2	20.2626	37	29		10	44
18.2834	Chico	172	62.8	21.2277	30	28	250	9.3	50.9	2.2	1	1	1	0	0	0	1	0.571429	0	0	0	0	0	0	0	0
18.3162	Chico	180	66.5	20.5247	21	27	203	6.1	33.5	0.56	0	0	0	0	0	0	0	0	0	0	0	0	0	0	0	0
18.3217	Chico	173	84.4	28.2001	26	21	160	6	38.4	0.64	1	1	1	1	0	1	1	0.857143	0	1	0	0	0	0	0	0.142857
18.4778	Chico	177	80.7	25.7589	32	25	225	9.3	42.3	1.72
18.5435	Chico	185	98.9	28.897	34	0	220	8	48.2	2.03	0	0	2	0	0	0	0	0.285714	0	1	1	0	1	0	0	0.428571
18.5791	Chico	172	57.1	19.301	24	18	225	7.13	40.2	1.2
18.6092	Chico	180	83.5	25.7716	10	23			39		0	0	0	0	0	0	0	0	0	1	1	0	0	0	1	0.428571
18.7762	Chico	176	63.4	20.4675	24	30	235	8.2	37.9	1.2	0	0	0	0	0	0	0	0	0	0	1	0	0	0	0	0.142857
18.9213	Chico	177	61.4	19.5985	30	34	220	8	25.9	0.89	0	0	0	0	0	0	0	0	0	0	0	0	0	0	3	0.428571
18.9322	Chico	171	68.2	23.3234	21	19	222	5	43.3	1.14
19.4305	Chico										0	0	1	0	0	1	0	0.285714	0	0	0	0	0	0	0	0
19.4333	Chico	178	69.2	21.8407	31	10	210	9.3	45.5	1.66
19.4415	Chico	170	50.4	17.4394	26	20	190	4	31.2	0.62	0	0	0	0	0	0	0	0	0	0	0	0	0	0	0	0
19.4798	Chico
19.6112	Chico	175	70.9	23.151	26	2	180	4.3	36	0.72
19.7947	Chico	179	59.8	18.6636	26	8	225	7	35.4	1.11	0	0	1	0	0	0	1	0.285714	0	1	0	0	0	0	0	0.142857
12.0356	Chico	156	59.7	24.5316	15	15	183	5.18	23.9	-0.35	4	4	4	4	4	4	4	4	0	0	0	0	0	0	0	0
12.0493	Chico	143	33	16.1377	24	16		7.25	19.9
12.0548	Chico	153	41.8	17.8564	13	7	204	5.56	29.7	-0.02	0	1	0	0	0	0	0	0.142857	0	1	0	0	0	0	0	0.142857
12.0684	Chico	160	46.7	18.2422	23	4	159	6.28	20.7	-0.26	0	1	0	0	0	0	0	0.142857	0	1	0	0	0	1	0	0.285714
12.0794	Chico	157	44.7	18.1346	16	15	169	4.04	20.1	-0.58	0	4	4	0	0	1	0	1.28571	0	0	0	0	0	0	0	0
12.0849	Chico	152	46.8	20.2562	22	12	151	5.2	21.5	-0.36	0	0	0	0	0	0	0	0	0	0	0	0	0	0	0	0
12.1177	Chico	139	36.2	18.7361	16	16	164	5.3	14.4	-0.86	1	0	0	0	0	0	0	0.142857	0	0	0	0	0	1	0	0.142857
12.1314	Chico	152	48.7	21.0786	21	21	174	6.75	17.6	-0.36	0	0	0	0	0	0	0	0	0	0	0	0	0	0	0	0
12.1424	Chico					6	158	3.2			0	0	0	0	0	0	0	0	0	0	0	0	0	0	0	0
12.1916	Chico	150	53.2	23.6444	23	15	160	1.25	27.8	0.04	4	4	1	2	4	1	2	2.57143	1	1	0	1	0	0	0	0.428571
12.1916	Chico	153	59.6	25.4603	16	7	153	4.17	12.9	-1.02	4	2	0	0	0	0	0	0.857143	1	2	0	0	0	0	0	0.428571
12.2053	Chico	148	35.1	16.0245	21	5	183	9.58	19	-0.22	0	1	0	0	0	0	0	0.142857	0	0	0	0	0	0	0	0
12.2108	Chico	142	38.3	18.9942	21	7	189	9.26	19.3	-0.16	0	0	0	0	0	0	0	0	0	0	0	0	0	0	0	0
12.2272	Chico	150	58	25.7778	12	14	92	3	24.8	-1.31	0	0	0	0	1	0	0	0.142857	0	0	0	0	0	0	0	0
12.2409	Chico	165	71.2	26.1524	20	10	153	4.11	21.9	-0.43	0	1	0	0	0	0	0	0.142857	0	1	0	0	0	0	0	0.142857
12.2578	Chico	154	33.9	14.2941	24	5	175	7	16.3	-0.25	2	0	2	0	0	3	1	1.14286	0	0	0	0	0	0	0	0
12.266	Chico	164	49.3	18.3299	20	5	180	7.5	29.7	0.14	1	2	1	0	0	0	0	0.571429	1	0	0	1	0	0	0	0.285714
12.2742	Chico	147	35.3	16.3358	33	18	185	5.5	22.1	0.57	0	0	0	0	0	0	0	0	0	0	0	0	0	0	0	0
12.277	Chico	156	52.2	21.4497	15	4	150	3	19.3	-0.84	1	1	0	0	0	0	0	0.285714	0	0	0	0	0	0	0	0
12.2902	Chico	160	52.3	20.4297	18	6	154	5.07	29.7	-0.21	0	0	0	0	0	4	0	0.571429	0	0	0	0	0	0	0	0
12.3039	Chico	154	54.7	23.0646	19	24.5	165	5.14	31	0	1	2	1	2	4	2	1	1.85714	1	1	2	1	1	1	0	1
12.3125	Chico	156	61.9	25.4356	21	14	145	4	16.5	-0.68	3	3	2	1	2	2	2	2.14286	1	1	0	0	0	1	0	0.428571
12.3125	Chico	147	33.7	15.5954	11	12	110	4	11.6	-1.74	0	0	0	0	0	0	0	0	0	0	0	0	0	0	0	0
12.3231	Chico	150	46.2	20.5333	23	5	184	9.09	18.1	-0.14	0	0	0	0	0	0	0	0	0	0	0	0	0	0	0	0
12.3368	Chico	174	66.9	22.0967	20	5	153	5.4	30	-0.1	1	1	1	0	0	0	0	0.428571	0	1	0	0	0	0	0	0.142857
12.3395	Chico	153	57.9	24.7341		8	152	1.57	28.3		0	0	0	0	0	0	0	0	0	0	0	0	0	0	0	0
12.3395	Chico	162	56.8	21.643	19	0	161	5.14	22.7	-0.38	0	0	0	0	0	0	0	0	0	0	0	0	0	0	0	0
12.3395	Chico	142	32.7	16.217	22	10	174	5.39	19.1	-0.25	0	0	0	0	1	0	0	0.142857	0	0	0	0	0	0	0	0
12.3504	Chico	162	44.4	16.9182	15	17	173	6.09	19.7	-0.61	0	4	4	4	0	0	3	2.14286	0	1	1	1	0	0	0	0.428571
12.3587	Chico	162	64	24.3865	25	5	130	3.5	28.2	-0.11	0	1	0	0	0	0	0	0.142857	0	0	0	0	0	0	0	0
12.3614	Chico	151	33.5	14.6923	22	8	168	10.26	15.3	-0.46	0	1	0	0	0	0	0	0.142857	0	0	0	0	0	0	0	0
12.3618	Chico	154	37.6	15.8543	22	8	170	4	19.1	-0.28	1	4	4	2	2	2	2	2.42857	1	2	0	0	1	1	0	0.714286
12.3833	Chico	155	44.6	18.564	19	14		8.2	24.2		0	0	0	0	0	0	0	0	0	0	0	0	0	0	0	0
12.386	Chico	166	49.6	17.9997	28	17	202	6.29	26	0.62	0	0	0	0	0	0	0	0	0	0	0	0	0	0	0	0
12.3864	Chico	152	40.1	17.3563	12	7	140	3	16	-1.23	0	0	0	0	0	0	0	0	0	0	0	0	0	0	0	0
12.4025	Chico	158	51.5	20.6297		0	121	3.29	13.7		1	1	1	0	1	0	0	0.571429	1	1	0	0	0	0	0	0.285714
12.4165	Chico	176	48.1	15.5282	14	5		3.5	24.3		0	1	0	0	0	0	0	0.142857	0	0	0	0	0	0	0	0
12.4216	Chico	158	79.1	31.6856	22	8	107	2	23.9	-0.66	1	1	1	1	1	1	0	0.857143	1	1	1	0	0	1	0	0.571429
12.4408	Chico	151	39.3	17.2361	24	4	184	4	16.8	-0.14	0	0	0	0	0	0	0	0	0	0	0	0	0	0	0	0
12.4494	Chico	163	66.3	24.9539	18	8	150	2	27.6	-0.33	0	0	0	0	0	0	0	0	0	0	0	0	0	0	0	0
12.4654	Chico	158	92.3	36.9732	19	11	160	6.25	27.9	-0.17	0	1	1	0	0	0	0	0.285714	0	0	0	0	0	0	0	0
12.4682	Chico	153	50.6	21.6156	19	7	157	5.45	24.2	-0.35	0	0	0	0	0	0	0	0	0	0	0	0	0	0	0	0
12.4685	Chico	146	38.6	18.1085	20	19	150	3	13.5	-0.81	1	1	0	0	0	0	0	0.285714	1	1	0	0	0	0	0	0.285714
12.4928	Chico	172	68.4	23.1206	17	6	168	5.32	28.8	-0.17	1	1	1	1	1	0	1	0.857143	0	1	0	0	0	0	0	0.142857
12.4986	Chico	143	29.2	14.2794	29	28	180	8	18.5	0.16	0	0	0	0	0	0	0	0	0	0	0	0	0	1	0	0.142857
12.4986	Chico	145	28.8	13.698	28	30	200	8.5	16.6	0.21	0	0	0	0	0	0	0	0	0	1	0	0	0	1	0	0.285714
12.5	Chico				18		137
12.501	Chico	157	61.3	24.8692	15	16		5.05	21.9		0	0	1	0	0	0	0	0.142857	0	0	0	0	0	0	0	0
12.5038	Chico	141	51	25.6526	26	12	131	5	16.6	-0.53	2	1	0	0	0	0	0	0.428571	0	0	0	0	0	0	0	0
12.5092	Chico	152	44.9	19.4339	21	15	190	4.5	18.1	-0.2	0	0	0	0	0	0	0	0	0	0	0	0	0	0	0	0
12.5229	Chico	141	51.7	26.0047	29	21	143	5.25	22.2	-0.02
12.5257	Chico	147	42	19.4363	18	5	139	5.09	17.2	-0.86	0	0	0	0	0	0	0	0	0	0	0	0	0	0	0	0
12.5311	Chico	147	34.4	15.9193	35	8	190	8.5	17.4	0.53	0	0	0	0	1	0	0	0.142857	0	0	0	0	0	0	0	0
12.5506	Chico	145	39.1	18.5969	15	17	160	4	13.8	-0.97	0	0	0	0	1	0	0	0.142857	0	0	0	0	0	0	0	0
12.5698	Chico	157	46.8	18.9866	26	21	190	5.5	23.1	0.28	0	0	1	0	0	0	1	0.285714	1	0	0	0	0	0	0	0.142857
12.5753	Chico	156	41.7	17.1351	23	18	180	5	13.5	-0.37	0	1	0	0	1	0	0	0.285714	0	1	0	0	0	0	0	0.142857
12.5832	Chico	166	47	17.0562	20	10	186	5.27	24.9	-0.01	0	0	0	0	0	0	0	0	0	0	0	0	0	0	0	0
12.5832	Chico	166	50.8	18.4352	21	7	173	5.44	21.8	-0.2	0	0	0	0	0	0	0	0	0	0	0	0	0	0	0	0
12.5859	Chico	147	46.2	21.38		0	105	2.13	10.1		0	0	0	0	0	0	0	0	0	0	0	0	0	0	0	0
12.5859	Chico	155	44.8	18.6472	29	22	199	8.53	28.7	0.76	0	0	0	0	0	0	0	0	0	0	0	0	0	0	1	0.142857
12.5914	Chico	163	46.9	17.6522	19	12	163	3.13	23.1	-0.35	0	0	0	0	0	0	0	0	0	0	0	0	0	0	0	0
12.5917	Chico	158	68.5	27.4395	18	25	136	3	24.6	-0.59	1	1	1	0	0	0	0	0.428571	1	0	0	0	1	0	0	0.285714
12.5917	Chico	156	62.9	25.8465	17	22	145	3.5	23.7	-0.59	0	0	0	0	1	0	0	0.142857	0	0	0	0	0	0	0	0
12.6054	Chico	154	55.7	23.4863	14	9	120	1.5	17.8	-1.23	0	2	2	2	0	1	0	1	0	0	0	0	0	0	0	0
12.6078	Chico	158	46.9	18.7871	27	14	177	5.25	23.3	0.23	1	1	1	1	0	0	1	0.714286	0	1	1	0	0	0	0	0.285714
12.6218	Chico	153	57.8	24.6914	15	1	100	1.5	17.5	-1.37	1	3	0	1	1	0	0	0.857143	1	0	0	0	0	0	0	0.142857
12.6324	Chico	148	51.5	23.5117	12	6	135	1.58	11.5	-1.46	0	0	0	0	1	0	0	0.142857	0	0	0	0	0	0	0	0
12.6324	Chico	153	49	20.9321	17	3	134	3.13	20.1	-0.84	1	4	0	0	0	0	0	0.714286	1	1	0	0	0	0	0	0.285714
12.6352	Chico	144	35	16.8789	20	16	161	5.18	15.7	-0.62	0	0	0	0	0	0	0	0	0	0	0	0	0	0	0	0
12.6461	Chico	149	36.5	16.4407	17	13	135	4.25	23	-0.71
12.6464	Chico	151	34.3	15.0432	26	17	190	7	20.9	0.19	0	0	0	0	0	0	0	0	0	0	0	0	0	0	0	0
12.6519	Chico	150	37.8	16.8	32	15	190	4.5	17.6	0.38	0	0	1	0	0	0	0	0.142857	0	0	0	0	0	0	0	0
12.6601	Chico	139	39.4	20.3923	21	22	180	5.5	10.7	-0.59	4	4	2	0	1	1	0	1.71429	0	1	1	0	0	1	0	0.428571
12.6653	Chico	146	66.7	31.291		0	97	1.1	13.7		0	0	0	0	0	0	0	0	0	0	0	0	0	0	0	0
12.6708	Chico	157	54.7	22.1916	23	15	172	4.5	18.5	-0.24	1	1	0	0	2	1	0	0.714286	0	1	0	0	0	0	0	0.142857
12.6765	Chico	154	60.1	25.3415	4	17	90	1.5	15.9	-2.13	1	0	0	0	0	2	0	0.428571	0	0	0	0	0	0	0	0
12.6845	Chico	158	66.8	26.7585	18	7	153	3	23.1	-0.49	0	0	0	0	0	0	0	0	0	0	0	0	0	0	0	0
12.6982	Chico	150	42.8	19.0222	13	8	156	5.32	19.7	-0.88	0	0	0	0	0	0	0	0	0	0	0	0	0	0	0	0
12.6982	Chico	145	37	17.5981	26	11	161	6.12	13.8	-0.37	0	0	0	0	0	0	0	0	0	0	0	0	0	0	0	0
12.7011	Chico	151	55.2	24.2095	24	20	170	3.5	19.9	-0.14
12.7148	Chico	152	35.3	15.2787	22	12	170	8	19.7	-0.26	0	0	0	0	0	1	0	0.142857	0	0	0	0	0	0	0	0
12.7176	Chico	165	51	18.7328	24	22	168	6	21.8	-0.08	0	0	0	0	0	0	0	0	0	0	0	0	0	0	0	0
12.7176	Chico	155	50.9	21.1863	35	21	190	6.5	28.4	0.99	0	0	0	1	1	0	0	0.285714	0	1	1	0	4	0	0	0.857143
12.7255	Chico	149	33.6	15.1345	26	9	191	9.1	16	0	0	0	0	0	0	0	0	0	2	2	1	1	0	1	1	1.14286
12.7474	Chico	168	61.5	21.79	22	18	160	7	23.9	-0.18	1	0	0	0	0	0	0	0.142857	0	0	0	0	0	0	0	0
12.7584	Chico	148	47.8	21.8225	25	0	117	3	15.3	-0.76	0	1	0	0	0	0	0	0.142857	0	1	0	0	0	0	0	0.142857
12.7584	Chico	156	53.5	21.9839	18	7	148	4.38	16.9	-0.79	1	1	1	0	0	0	0	0.428571	1	1	1	0	0	0	0	0.428571
12.7748	Chico	154	52	21.9261	18	8	138	3.25	19.1	-0.79
12.7748	Chico	155	55.5	23.1009	30	8	160	4.25	25.5	0.32	0	1	4	0	1	0	0	0.857143	1	1	1	0	0	0	0	0.428571
12.7803	Chico	155	50.1	20.8533	28	20	181	8.5	21.9	0.26	0	4	0	1	0	1	0	0.857143	3	3	0	1	0	1	0	1.14286
12.7803	Chico	158	48.5	19.428	29	11	171	9	21	0.18	0	0	1	0	0	0	0	0.142857	1	1	0	0	0	0	0	0.285714
12.7858	Chico	162	52.7	20.0808	18	11	133	4.16	18.8	-0.85	0	1	0	0	0	1	0	0.285714	0	1	0	0	0	0	0	0.142857
12.7887	Chico	163	45.8	17.2381	18	14	160	4.5	18.2	-0.63	0	0	0	0	0	0	0	0	0	0	0	0	0	0	0	0
12.8159	Chico	151	56.7	24.8673	18	18	128	4.11	12.5	-1.16	0	0	0	0	0	0	0	0	0	0	0	0	0	0	0	0
12.8243	Chico	165	73	26.8136	18	10	140	4	31.2	-0.28
12.8517	Chico	164	58.5	21.7504	18	5	145	3	19.9	-0.7	2	3	3	0	1	0	1	1.42857	1	1	1	0	0	0	0	0.428571
12.8624	Chico	152	51	22.0741	26	10	141		19.9	-0.3	1	1	0	0	0	0	0	0.285714	0	0	0	0	0	0	0	0
12.8626	Chico	167	40.7	14.5936	30	5	190	9.5	24.2	0.54	0	0	0	0	0	0	0	0	0	0	1	0	0	0	0	0.142857
12.8679	Chico	162	52.4	19.9665	21	1	170	7.33	23.4	-0.16	1	1	0	0	0	0	0	0.285714	1	1	0	0	0	0	0	0.285714
12.879	Chico	162	38.2	14.5557	17	8	170	2	18.8	-0.57	1	4	2	0	0	1	0	1.14286	0	2	1	0	0	0	0	0.428571
12.8872	Chico	167	50.5	18.1075	25	28	230	6.5	28	0.8	0	0	0	0	0	0	0	0	0	0	0	0	1	0	0	0.142857
12.8953	Chico	150	44.9	19.9556	20	8	140	5.16	16	-0.8	1	2	0	0	1	0	0	0.571429	1	1	0	0	0	0	0	0.285714
12.9035	Chico	165	67.6	24.8301	25	12	159	7.75	29.7	0.22	1	0	0	1	0	0	0	0.285714	1	1	0	0	0	0	0	0.285714
12.9062	Chico	143	43.6	21.3213	18	5	103	2.34	14.7	-1.3	0	0	0	0	0	0	0	0	0	0	0	0	0	0	0	0
12.9336	Chico	169	77.3	27.0649	14	3	139	2.13	24.9	-0.76	0	0	0	0	0	0	0	0	0	0	0	0	0	0	0	0
12.9365	Chico	166	42.5	15.4231	27	13	215	7	23.7	0.59	0	1	1	0	0	0	0	0.285714	0	0	0	0	0	0	0	0
12.9555	Chico	163	60	22.5827	25	15	136	2.5	19	-0.44	0	0	0	0	1	1	0	0.285714	0	0	0	0	0	0	0	0
12.9557	Chico	157	42.9	17.4044	25	8	170	7	18.7	-0.14	1	0	0	1	0	0	0	0.285714	0	0	0	0	0	0	0	0
12.961	Chico	154	40.9	17.2457	18	11	164	3	23.3	-0.38	1	1	1	1	0	0	1	0.714286	1	2	1	1	0	1	0	0.857143
12.961	Chico	157	51	20.6905	20	5	155	5.14	27.2	-0.19	1	2	2	2	0	1	0	1.14286	1	1	0	0	0	0	0	0.285714
12.983	Chico	156	53.7	22.0661	27	24		5	23.1		1	1	3	1	0	2	1	1.28571	0	0	0	0	0	0	0	0
12.9856	Chico	155	50.9	21.1863	18	0	142	4.46	10.1	-1.13	0	0	0	0	0	0	0	0	0	0	0	0	0	0	0	0
13.013	Chico	144	31.8	15.3356	27	15	172	7	21.5	0.1
13.0186	Chico	172	55.9	18.8953	21	9	175	4	30.3	0.17	0	0	0	0	0	0	0	0	0	0	0	0	0	0	0	0
13.0268	Chico	162	73.7	28.0826	33	4	145	3.5	27.2	0.42	1	1	0	0	1	0	0	0.428571	1	1	1	0	1	0	0	0.571429
13.0459	Chico	144	68.6	33.0826	19	5	102	1.75	15.3	-1.23	0	0	0	0	0	0	0	0	0	0	0	0	0	0	0	0
13.0597	Chico	172	73.2	24.7431	25	4	175	4	37.8	0.7	0	1	0	0	0	0	0	0.142857	0	0	0	0	0	0	0	0
13.0624	Chico	155	42.4	17.6483	23	11	175	8	23.3	-0.01	1	1	0	0	0	0	0	0.285714	1	1	1	0	0	0	4	1
13.0787	Chico	167	54.4	19.5059	24	3	150	4	26.3	-0.06	0	0	0	0	0	0	0	0	0	0	0	0	0	0	0	0
13.0787	Chico	139	29.1	15.0613	25	19	160	6.28	13.5	-0.44	0	0	0	0	0	0	0	0	0	0	0	0	0	0	0	0
13.0788	Chico	148	32.2	14.7005	29	19	182	6.5	19.3	0.21	0	1	1	1	0	0	1	0.571429	0	1	0	0	0	0	0	0.142857
13.0815	Chico	156	45.9	18.8609	25	13	146	6	19.7	-0.32	0	0	0	0	0	0	0	0	0	0	0	0	0	0	0	0
13.0869	Chico	157	58.8	23.8549	23	18	109	3.25	24.8	-0.55
13.087	Chico	154	51.8	21.8418	15	12	125	2	18.4	-1.11	4	4	4	4	3	4	4	3.85714	0	0	0	1	0	0	0	0.142857
13.0897	Chico	146	66	30.9627	29	15	105	1.5	26	-0.22	4	4	1	3	1	1	2	2.28571	4	3	4	4	0	4	4	3.28571
13.0979	Chico	169	64.6	22.6183		15			29
13.1006	Chico	152	34	14.7161	27	15	220	8	23	0.61	1	0	0	0	0	0	0	0.142857	1	1	1	0	1	0	0	0.571429
13.1116	Chico	170	57.1	19.7578	16	15	201		35.7	0.36	0	0	0	0	0	0	0	0	0	0	0	0	0	0	0	0
13.1253	Chico	164	38.8	14.4259	23	15	155	2	16	-0.5	4	4	2	3	2	4	4	3.28571	0	0	0	0	0	0	0	0
13.1335	Chico	154	38	16.0229	23	15	135	4.5	13	-0.8	0	0	0	0	0	1	0	0.142857	0	0	0	0	0	0	0	0
13.1335	Chico	156	47	19.313	27	11	201	5.5	24	0.47	0	0	0	0	0	0	0	0	0	0	0	0	0	0	0	0
13.1336	Chico	161	49.8	19.2122	28	19	215	8.5	30.8	0.94	0	1	0	0	0	0	0	0.142857	0	0	0	0	0	0	0	0
13.1363	Chico	169	49.1	17.1913	27	16	212	7	26	0.66	0	1	0	0	0	1	1	0.428571	0	0	0	0	0	0	1	0.142857
13.139	Chico	149	35.1	15.8101	21	16	175	2	18.2	-0.33	3	4	3	4	0	1	1	2.28571	1	2	1	1	0	0	0	0.714286
13.1499	Chico	157	55	22.3133	23	15	110	2.5	21.3	-0.69	0	0	1	0	0	0	0	0.142857	0	0	1	0	0	0	1	0.285714
13.1554	Chico	166	56	20.3223	29	18	165	6.5	21.5	0.15
13.1664	Chico	157	51.9	21.0556	20	16	190	7	28.7	0.19	0	1	1	0	0	1	0	0.428571	0	1	0	0	0	0	0	0.142857
13.1719	Chico	147	40.1	18.5571	18	15	162	3.5	17.4	-0.64	0	0	0	0	0	0	0	0	0	0	0	0	0	1	0	0.142857
13.1745	Chico	144	39.1	18.8561	28	30	173	7.25	24.8	0.3	0	0	0	0	0	0	0	0	0	0	0	0	0	0	0	0
13.1801	Chico	159	38.2	15.1102	19	10	210	6	18.5	-0.1	0	0	0	0	0	0	0	0	0	0	0	0	0	0	0	0
13.1801	Chico	169	52.1	18.2417	27	26	200	8	34.9	0.92	0	0	0	0	1	0	0	0.142857	0	0	1	0	0	0	0	0.142857
13.1938	Chico	157	39.3	15.9439	32	26	200	10	19.1	0.53	0	0	1	0	0	0	0	0.142857	0	0	0	0	0	0	0	0
13.1964	Chico	160	99.1	38.7109	10	1	60		16.6	-2.05
13.2019	Chico	160	63.6	24.8438	22	21	154	4	22.1	-0.31	0	0	0	0	0	0	0	0	0	0	0	0	0	0	0	0
13.243	Chico	155	64.9	27.0135	17	19	143	2	21.3	-0.71	0	0	0	0	0	0	0	0	0	0	0	0	0	0	0	0
13.2539	Chico	158	65.2	26.1176	24	35	135	4	33.4	0.1	0	0	0	0	0	0	0	0	0	0	0	0	0	0	0	0
13.2621	Chico	165	46.5	17.0799	20	16	115	2	14.7	-1.08	0	0	0	0	0	0	0	0	0	0	0	0	0	0	0	0
13.2621	Chico	165	46.7	17.1534	19	17	160	3	23	-0.38
13.2621	Chico	163	50	18.8189	27	15	250	9	29	1.13	0	1	0	0	0	0	0	0.142857	0	1	1	0	0	0	0	0.285714
13.3196	Chico	169	49	17.1563	22	26	155	4	25	-0.18
13.3744	Chico	160	69	26.9531	23	25	190	5	13.6	-0.27	0	0	0	0	0	0	0	0	1	1	0	1	0	0	0	0.428571
13.3771	Chico	158	50	20.0288	17	16	198	7.3	33	0.28	0	0	0	0	0	0	0	0	0	0	0	0	0	0	0	0
13.3936	Chico	164	43.9	16.3221		15		7	22.5
13.4045	Chico	162	43.9	16.7276	30	5	219	5.5	28.1	0.97	0	0	0	0	0	0	0	0	1	0	0	0	0	0	0	0.142857
13.4127	Chico	161	69	26.6193	23	15	135	2	18	-0.6
13.4237	Chico	163	45	16.937	23	15	170	4.5	19.6	-0.21	0	0	0	0	0	0	0	0	0	0	0	0	0	0	0	0
13.4237	Chico	164	56.8	21.1184	17	15	178	6	27.6	-0.13	1	1	1	1	0	0	0	0.571429	1	1	1	0	0	0	0	0.428571
13.4374	Chico	164	79	29.3724	15	15	90	3	21.6	-1.29	1	1	1	0	0	0	0	0.428571	1	1	1	0	0	0	0	0.428571
13.4511	Chico	153	47.8	20.4195	1	1	112	2.19	11.3	-2.28	1	1	1	0	0	0	1	0.571429	1	1	0	0	0	1	1	0.571429
13.4511	Chico	165	75.5	27.7319	20	11	133	3.45	22.8	-0.58	0	0	0	0	0	0	0	0	0	1	1	0	0	0	0	0.285714
13.4538	Chico	160	65.5	25.5859				2	23.1		1	1	0	1	1	0	0	0.571429	1	1	0	0	0	0	0	0.285714
13.4565	Chico	152	70.5	30.5142	26	18	132	2.25	22.2	-0.29	1	1	3	4	1	2	2	2	3	2	1	3	4	4	3	2.85714
13.5003	Chico	163	71.8	27.024	31	12	145	5	19.9	0.01	0	0	0	0	0	0	0	0	0	0	0	0	0	0	0	0
13.5003	Chico	166	64.8	23.5157	22	15	150	5.5	26.1	-0.18	0	0	0	0	0	0	0	0	0	0	0	0	0	0	0	0
13.5086	Chico	173	60	20.0474	20	15	217	7	19.3	0.05	0	2	0	0	0	0	0	0.285714	0	4	3	1	1	0	0	1.28571
13.5195	Chico	167	62.4	22.3744		0	156	8.53	26.1		0	0	1	1	0	0	0	0.285714	1	0	0	0	0	0	0	0.142857
13.5441	Chico	171	56	19.1512	28	15	189	4	26	0.5	1	0	0	0	1	0	0	0.285714	1	0	0	0	1	0	0	0.285714
13.5441	Chico	171	58	19.8352	31	15	169	5	23.7	0.39	1	0	0	0	1	0	0	0.285714	1	0	0	0	1	0	0	0.285714
13.5934	Chico	168	49.5	17.5383	14	15	143	4	24.3	-0.75	4	4	3	0	0	0	1	1.71429	3	3	1	1	1	0	1	1.42857
13.5989	Chico	167	50	17.9282	23	15	200	4	21.3	0.14	0	0	0	0	0	0	0	0	0	0	0	0	0	0	0	0
13.5989	Chico	183	89	26.5759		15		4	30.6		4	3	0	3	0	0	0	1.42857	0	0	0	0	0	0	0	0
13.6235	Chico	166	42.8	15.532	13	0	151	2.51	21.7	-0.84	0	0	0	0	0	0	0	0	0	0	0	0	0	0	0	0
13.6318	Chico	138	33.1	17.3808	37	17	155	6.5	17.1	0.31	0	0	0	0	0	0	0	0	0	0	0	0	0	0	0	0
13.6372	Chico	178	65	20.5151	17	17	147	1.5	26	-0.48	0	0	0	0	0	0	0	0	0	0	0	0	0	0	0	0
13.6372	Chico	159	40.6	16.0595	30	9	182	8	20.9	0.33	2	4	4	0	0	0	1	1.57143	3	4	2	1	0	0	0	1.42857
13.6454	Chico	162	55.5	21.1477	31	10	160	8.5	19.7	0.14	0	0	0	1	1	1	1	0.571429	0	0	0	0	0	0	0	0
13.6619	Chico	166	49	17.782	28	15	183	8	13	-0.09	0	0	0	0	0	0	0	0	0	0	0	0	0	0	0	0
13.6783	Chico	176	45.7	14.7534	21	15	192	6.5	23	0.03
13.6838	Chico	156	49.4	20.2991	31	1	158	7	22.6	0.24	0	1	3	1	1	0	1	1	1	1	0	0	1	0	0	0.428571
13.6864	Chico	143	29	14.1816	21	1	160	6	16.5	-0.54	0	0	0	1	1	0	1	0.428571	0	1	1	0	0	0	0	0.285714
13.6947	Chico	157	51.2	20.7716	34	22	155	3.5	18.4	0.2	0	2	2	0	1	0	0	0.714286	0	1	0	0	0	0	0	0.142857
13.7166	Chico				25	6	156	2.11			0	1	0	0	0	0	0	0.142857	0	0	0	0	0	0	0	0
13.7358	Chico	170	70	24.2215	24	15	145	4.5	22.2	-0.28
13.7495	Chico	159	51.3	20.2919	27	12	150	6	24.3	0.02	0	3	0	0	1	0	0	0.571429	0	1	0	0	0	1	0	0.285714
13.7495	Chico	152	45	19.4771	30	15	174	8	17.2	0.11
13.7632	Chico	166	62.3	22.6085	19	17	129	4.06	25.5	-0.56	0	1	0	0	0	0	0	0.142857	0	1	0	0	0	0	0	0.142857
13.7659	Chico	157	50.9	20.6499	28	15	202	7.5			0	2	1	0	1	0	1	0.714286	0	0	0	0	0	0	0	0
13.7741	Chico	149	35.4	15.9452	29	4	180	9	17.4	0.12	0	0	1	1	0	0	0	0.285714	0	0	0	0	0	0	0	0
13.7769	Chico	172	57	19.2672	25	16	190	4.5	16.5	-0.05	0	0	0	0	0	0	0	0	0	0	0	0	0	0	0	0
13.7878	Chico	167	51.6	18.5019		9		1.03	19.9		1	3	1	1	0	0	0	0.857143	2	3	1	1	0	0	0	1
13.7906	Chico	169	55	19.257	31	24	237	6	33	1.39
13.7933	Chico	163	64	24.0882	28	15	176	7	23.7	0.29	0	0	0	0	0	0	1	0.142857	0	0	0	0	0	0	0	0
13.7933	Chico	173	58	19.3792	32	15	220	8.5	33	1.29
13.796	Chico	153	46.5	19.8642	35	11	190	8.25	21.8	0.72	0	0	0	0	0	0	0	0	1	0	0	0	0	0	0	0.142857
13.8152	Chico	163	78	29.3575	21	0		2.1	20.6		0	0	0	0	0	0	0	0	0	0	0	0	0	0	0	0
13.8563	Chico	170	46.6	16.1246	15	15	170	2	25.4	-0.4
13.859	Chico	173	73.2	24.4579	15	15	137		26.7	-0.65	0	1	1	0	1	0	0	0.428571	0	0	0	0	0	0	0	0
13.8617	Chico	158	72.3	28.9617	24	20	180	5	23.1	0.08	0	0	0	0	0	0	0	0	0	0	0	0	0	0	0	0
13.87	Chico	163	45.6	17.1629	21	12	202	8.11	28.1	0.33	1	1	1	1	1	0	0	0.714286	4	3	1	1	2	0	0	1.57143
13.8754	Chico	161	56	21.6041	25	15	209	5	28.4	0.62	0	0	0	0	0	1	1	0.285714	0	0	0	0	0	0	0	0
13.88	Chico	170	59	20.4152	30	15	175	10	26	0.48
13.8864	Chico	176	65	20.984	15	15	157	3	22.5	-0.64	1	2	1	1	0	1	0	0.857143	2	1	1	0	3	0	2	1.28571
13.9165	Chico				20	9	123	3.48			0	1	0	0	0	0	0	0.142857	0	1	0	0	0	0	0	0.142857
13.9165	Chico				18		124
13.9247	Chico	161	75.4	29.0884	14	11	120	2.35	19.7	-1.15	0	0	0	0	0	0	0	0	0	0	0	0	0	0	0	0
13.9247	Chico	177	58.3	18.609	30	15	210	8.5	39	1.34	1	2	1	1	0	4	1	1.42857	1	1	0	1	0	0	0	0.428571
13.9329	Chico	165	56.5	20.753	22	15	183	7.53	28.7	0.23	0	0	0	0	0	0	0	0	1	0	2	0	0	0	0	0.428571
13.9493	Chico	178	75.9	23.9553	28	15	150	5.3	17.5	-0.21	1	1	1	1	1	0	0	0.714286	2	2	1	1	0	0	0	0.857143
13.9521	Chico	162	45.8	17.4516	26	15	200	5	17.4	0.14	0	1	0	0	0	0	0	0.142857	0	1	1	0	0	0	0	0.285714
13.9576	Chico	162	44.4	16.9182	23	19	138	7.25	24.2	-0.31	0	0	0	0	0	0	0	0	0	0	0	0	0	0	0	0
13.9685	Chico	163	77.2	29.0564	26	15	187	7	37.3	0.84	1	1	1	1	1	2	0	1	0	0	0	0	1	0	0	0.142857
13.9713	Chico	168	80	28.3447	29	15	120	1.5	20	-0.33	1	1	1	1	1	0	0	0.714286	0	0	1	0	0	0	0	0.142857
13.9765	Chico	169	55.4	19.3971	27	16	195	7	38.1	1	0	0	0	0	0	0	0	0	0	0	0	0	0	0	0	0
13.9792	Chico	180	76.5	23.6111	32	4	195	9	37	1.23	0	0	0	0	0	0	0	0	0	0	0	0	0	0	0	0
13.9795	Chico	156	38	15.6147	17	7	160	5.45	15.6	-0.79	0	0	0	0	0	0	0	0	1	1	0	1	0	0	1	0.571429
13.9847	Chico										1	3	3	4	2	1	4	2.57143	1	0	1	2	4	3	4	2.14286
14.0014	Chico	166	46.8	16.9836	28	10	180	5.5	33.1	0.71	0	0	0	0	0	0	0	0	0	0	0	0	0	0	0	0
14.0014	Chico	170	45.7	15.8131	26	15	154	6	24	-0.01
14.0151	Chico				29	16	200	8	23	0.53	0	0	0	0	0	0	0	0	0	0	0	0	0	0	0	0
14.0397	Chico	183	58.5	17.4684	29	15	200	5	23.4	0.55	0	1	1	0	0	1	0	0.428571	1	1	0	0	0	0	0	0.285714
14.0438	Chico										1	0	1	1	0	1	0	0.571429	0	0	1	0	0	1	0	0.285714
14.0449	Chico										1	0	1	0	0	0	0	0.285714	0	0	0	0	0	0	0	0
14.0452	Chico	159	54	21.3599	15	15	150		29.1	-0.43	4	4	0	0	0	0	1	1.28571	2	3	0	0	0	0	0	0.714286
14.0507	Chico	170	60.3	20.8651	20	3	130	4.25	24.8	-0.52	0	0	0	0	0	0	0	0	0	0	0	0	0	0	0	0
14.0586	Chico										0	0	0	0	0	0	0	0	0	0	0	0	0	0	0	0
14.0722	Chico	170	81.1	28.0623	22	31	160	5.5	40.6	0.51	0	0	0	0	0	0	0	0	0	0	0	0	0	0	0	0
14.0753	Chico	175	80	26.1224	21	15	140	2			0	0	0	0	0	0	0	0	0	0	0	0	0	0	0	0
14.0753	Chico	161	52.4	20.2153	32	19	231	5	29.3	1.24	0	1	0	0	1	0	0	0.285714	0	0	0	0	1	0	0	0.142857
14.0777	Chico	156	41.5	17.0529	24	4	205	6.5	24.2	0.36	0	0	0	1	0	0	0	0.142857	0	0	0	0	0	0	0	0
14.0999	Chico	173	61.2	20.4484	36	3	173	9	33.2	1.09	0	0	0	0	0	0	0	0	0	0	0	0	0	0	0	0
14.1027	Chico	169	67.1	23.4936	24	11	141	6.1	21.6	-0.34	0	0	0	0	0	0	0	0	0	0	0	0	0	0	0	0
14.1109	Chico	156	53.3	21.9017	24	15	174	3
14.1355	Chico	159	60.1	23.7728	27	11	170	7.75	25.4	0.25	0	0	0	0	0	0	0	0	0	0	0	0	0	0	0	0
14.1379	Chico	175	66.5	21.7143	16	10	180	5.5	28.8	-0.12	0	0	0	0	0	0	0	0	0	0	0	0	0	0	0	0
14.1407	Chico	172	68.6	23.1882		28	165	6	36		0	0	0	0	0	0	0	0	0	0	0	0	0	0	0	0
14.1437	Chico	172	75	25.3515	27	22	153	5.5	35.8	0.52	0	1	1	0	0	0	1	0.428571	0	1	0	1	1	0	1	0.571429
14.152	Chico	155	41.5	17.2737	25	24	205	7.25	25.5	0.46	0	0	0	0	0	0	0	0	1	3	1	1	0	0	0	0.857143
14.1574	Chico	170	60.2	20.8304	31	15	202	10.5	44.7	1.56
14.1626	Chico	178	87.5	23.249	22	17	180	4.5	43.5	0.82	0	0	0	0	0	0	0	0	0	0	0	0	0	0	0	0
14.1708	Chico										0	0	0	0	0	0	0	0	0	0	0	0	0	0	0	0
14.1739	Chico	169	54.8	19.187	18	5	120	4.17	16.9	-1.05	0	0	0	0	0	0	0	0	0	0	0	0	0	0	0	0
14.1762	Chico	168	46	16.2982	22	19	185	4.5	26.1	0.14	0	0	0	0	0	0	0	0	0	0	0	0	0	0	0	0
14.1766	Chico	178	47.3	14.9287	23	20		7.3	23.1		0	1	0	0	0	0	0	0.142857	0	0	0	0	0	0	0	0
14.204	Chico	172	74.9	25.3177	24	6	195	5.54	29.3	0.48	0	2	0	0	0	0	0	0.285714	2	3	3	0	0	0	0	1.14286
14.2067	Chico	172	83.4	28.1909	17	3	135	3.3	21.5	-0.78	0	0	0	0	0	0	0	0	0	0	0	0	0	0	0	0
14.2091	Chico	174	82.5	27.2493	26		178	4	37	0.75	0	0	0	0	0	0	0	0	0	0	0	0	0	0	0	0
14.2122	Chico	173	59.6	19.9138	27	19	192	9	35.4	0.86	0	0	0	0	0	0	0	0	0	1	1	0	0	0	0	0.285714
14.2177	Chico	176	88.5	28.5705	21	11	170	3.5	35.2	0.33	0	1	1	2	0	0	2	0.857143	0	1	0	0	0	0	0	0.142857
14.2177	Chico	153	42.8	18.2836	26	21	170	7	20.6	0	0	0	0	0	0	0	0	0	0	0	0	0	0	0	0	0
14.2228	Chico										4	4	4	4	4	4	4	4	4	4	4	4	4	4	4	4
14.231	Chico	166	66	23.9512	17	17	156	4	22.1	-0.56	0	0	0	0	0	0	0	0	0	0	0	0	0	0	0	0
14.245	Chico	171	49.9	17.0651	34	20	253	5.5	30.4	1.6	1	4	0	0	0	1	0	0.857143	1	4	4	0	0	0	0	1.28571
14.2529	Chico	154	48	20.2395				2	20
14.2583	Chico	153	73.2	31.27	22	13	134	2.5	30.7	-0.13	0	0	0	0	0	0	0	0	0	0	0	0	0	0	0	0
14.2587	Chico	165	50	18.3655	35	20	178	8	25.1	0.74	0	0	0	0	0	0	0	0	0	0	0	0	0	0	0	0
14.2611	Chico	160	59	23.0469		20	150	5	24.9		0	0	0	0	0	0	0	0	0	0	0	0	0	0	0	0
14.272	Chico	159	54.4	21.5181		15	140	4	19.6
14.2752	Chico	175	76.4	24.9469	28	11	190	6	51.5	1.57	0	0	1	0	1	0	0	0.285714	0	4	3	1	1	0	1	1.42857
14.2752	Chico	170	53.4	18.4775	30	0	220	6.3	19	0.6	1	3	2	1	1	1	1	1.42857	0	1	1	0	0	0	0	0.285714
14.2802	Chico	179	67.2	20.9731		20	150	2	30.1		2	2	0	0	0	1	0	0.714286	2	2	2	0	0	0	0	0.857143
14.2802	Chico	165	60.3	22.1488					19.9
14.283	Chico	175	53	17.3061		25	180	5	33.7		0	0	0	0	0	0	0	0	0	0	0	0	0	0	0	0
14.283	Chico	174	61	20.148		3	210	9	36.6
14.2939	Chico	164	50.5	18.776	32	12	204	10.5	27.8	0.93	0	1	0	0	0	0	0	0.142857	0	0	0	0	0	0	0	0
14.2943	Chico	165	45.3	16.6391	38	0	185	10	36.6	1.45	0	0	0	0	0	3	1	0.571429	0	4	4	0	0	2	2	1.71429
14.2943	Chico	176	56.3	18.1754	24	5	216	10.3	32.1	0.78	0	1	1	0	0	0	0	0.285714	1	1	0	0	0	0	0	0.285714
14.2994	Chico	166	49.6	17.9997		15	210	8.5	26.6		0	0	1	0	1	0	0	0.285714	0	0	0	0	0	0	0	0
14.3021	Chico	167	60.6	21.729		18	178	5	28.5
14.3049	Chico	169	45.1	15.7908		15	210	9	33.1		0	1	1	0	0	0	1	0.428571	0	0	0	0	1	0	0	0.142857
14.3053	Chico	162	63.4	24.1579	13	4	150	4	17.6	-1.02	1	1	0	0	0	1	0	0.428571	0	1	0	1	0	0	0	0.285714
14.308	Chico	165	82	30.1194		16		1	20.7		0	0	0	0	0	0	0	0	0	0	0	0	0	0	0	0
14.3135	Chico	178	76.6	24.1762	19	0	151	5	25.1	-0.37	0	0	0	0	0	0	1	0.142857	0	0	0	0	0	0	0	0
14.3158	Chico	175	70.4	22.9878	20	7	150	2	29.5	-0.15	0	0	0	0	0	0	0	0	0	0	0	0	0	0	0	0
14.3186	Chico	158	50.7	20.3092	20	13	170	7	25.8	-0.12	0	0	0	0	0	0	0	0	0	0	0	0	0	0	0	0
14.3213	Chico	176	56.7	18.3045		18	195	9	26.4
14.3217	Chico	176	50.6	16.3352	20	6	201	6	31.5	0.41	0	3	0	0	0	0	0	0.428571	0	0	0	0	0	0	0	0
14.324	Chico	170	47	16.263		0	200	8	22.4		0	0	0	0	2	0	0	0.285714	0	0	0	0	1	0	0	0.142857
14.3268	Chico	163	57	21.4536		17	170	8.5	27.2
14.3377	Chico	184	85.9	25.3722	29	9	211	5.5	41.7	1.41	0	0	0	0	0	0	0	0	0	0	0	0	0	0	0	0
14.3404	Chico	172	69	23.3234		23	187	8	37.9		1	0	0	0	1	0	0	0.285714	3	1	0	0	0	1	0	0.714286
14.3436	Chico	172	60	20.2812	26	15	160	6.5	32.2	0.38	0	1	1	1	0	1	0	0.571429	1	1	0	0	0	0	0	0.285714
14.3459	Chico	173	46.6	15.5702		5	170	7	26.7		0	0	0	0	0	0	0	0	0	0	0	0	0	0	0	0
14.3518	Chico	171	59	20.1771	28	15	168		27.3	0.36	4	4	4	4	2	3	3	3.42857	0	1	3	0	0	1	0	0.714286
14.3678	Chico	181	76.5	23.3509	30	6	205	10	41.5	1.4	1	0	0	0	0	0	0	0.142857	0	0	0	0	0	0	0	0
14.371	Chico	179	60.3	18.8196					30.7
14.3737	Chico	169	69.6	24.3689	20	20	186	6
14.3737	Chico	165	60.1	22.0753	30	2	185	10	34.3	0.92	0	1	1	1	0	0	0	0.428571	0	0	0	0	0	1	0	0.142857
14.3847	Chico	147	46.4	21.4725	31	9	228	7.25	26.4	1.04	0	0	0	0	0	0	0	0	0	1	0	0	0	0	0	0.142857
14.3874	Chico				30	5	189	3.35			0	0	0	0	0	0	0	0	0	1	1	0	0	0	0	0.285714
14.3924	Chico	169	62.4	21.848		17	220	8	33.7		0	0	0	0	0	0	0	0	0	0	0	0	0	0	0	0
14.3952	Chico	174	58.5	19.3222		20	205	8	35.8		0	0	0	0	0	0	0	0	0	1	0	0	0	0	0	0.142857
14.3979	Chico	168	67.8	24.0221		20	170	8	23.9		0	1	1	0	0	0	0	0.285714	0	1	0	0	0	0	0	0.142857
14.4034	Chico	176	63.8	20.5966	25	9	249	7.5	36.4	1.32	0	0	0	0	0	0	0	0	0	0	0	0	0	0	0	0
14.4038	Chico	159	79.8	31.5652	28	17	160	5	33.3	0.54	0	0	0	0	0	0	1	0.142857	0	0	0	0	0	0	0	0
14.412	Chico	159	57.6	22.7839	32	15	167	7	24.9	0.47	1	1	1	0	1	0	0	0.571429	0	1	1	0	1	0	0	0.428571
14.4171	Chico	157	48.9	19.8385		10	145	2.5	21.5		1	0	0	0	1	0	0	0.285714	0	1	0	0	0	1	0	0.285714
14.4198	Chico	178	76.7	24.2078		15	210	7	29.9		0	1	0	0	0	0	0	0.142857	0	1	0	0	0	0	0	0.142857
14.423	Chico	183	61	18.2149	31	15	148	6	32.5	0.56
14.423	Chico	177	55.1	17.5875	23	10	168	7.05	24.5	-0.02	0	0	0	0	0	0	0	0	0	0	0	0	0	0	0	0
14.4253	Chico	174	68.8	22.7243	22	6	176	6	26.3	0.07	1	1	1	1	1	0	1	0.857143	0	1	0	1	0	0	0	0.285714
14.4253	Chico	173	66.2	22.119		10	175	7	38.7		0	0	0	0	0	0	0	0	0	0	0	0	0	0	0	0
14.4257	Chico	164	55.2	20.5235	20	9	134	2.25	22.8	-0.57	0	1	1	0	0	0	0	0.285714	0	1	1	0	0	0	0	0.285714
14.4257	Chico	166	48.9	17.7457	34	15	182		28.9	0.88
14.4312	Chico	152	49.8	21.5547	37	4	160	6	21.8	0.55	1	1	1	0	0	0	2	0.714286	0	0	0	0	0	0	0	0
14.4417	Chico	164	54	20.0773		18	185	7.5	31		0	0	0	0	0	0	0	0	0	0	0	0	0	0	0	0
14.4444	Chico	171	76	25.9909		17	175	5	29.4		0	0	0	0	0	0	0	0	0	0	0	0	0	0	0	0
14.4476	Chico	163	75.5	28.4166	17	35	154	4	29.4	-0.28	0	0	0	0	0	0	0	0	0	0	0	0	0	1	0	0.142857
14.4527	Chico	180	67.9	20.9568		18	150	5	30.9		0	0	0	0	0	0	0	0	0	0	0	0	0	0	0	0
14.4543	Chico	168	50.2	17.7863	20	0	173	7	24.8	-0.13	0	0	0	0	0	0	0	0	0	0	0	0	0	0	0	0
14.4554	Chico	166	82.2	24.5677	14	3	174	1.5	32.8	-0.11	2	4	4	2	2	4	4	3.14286	1	1	0	0	0	0	1	0.428571
14.4586	Chico	156	57.4	23.5865	28	15	227	8.5	21.3	0.66	0	1	0	0	0	0	0	0.142857	0	0	0	0	0	0	0	0
14.4609	Chico	183	84.6	25.262	21	9	128	2	36.8	0.01	0	2	2	0	0	4	0	1.14286	0	0	0	0	0	0	0	0
14.4695	Chico	163	51.2	19.2706	21	25	175	8.3	24.8	-0.06	1	3	3	2	4	1	0	2	0	1	3	1	1	2	4	1.71429
14.4723	Chico	166	36.8	13.3546	26	21	192	7.35	20.4	0.19	0	0	0	0	0	0	0	0	0	0	0	0	0	0	0	0
14.4745	Chico										1	1	0	0	0	1	0	0.428571	0	0	0	0	0	1	0	0.142857
14.4882	Chico	181	49.3	15.0484	20	0	180	6	29.1	0.11	0	0	0	0	0	1	0	0.142857	0	0	0	0	0	0	0	0
14.4887	Chico	172	58.1	19.639	17	20	165	3	35.8	0.09	0	3	3	0	3	0	0	1.28571	0	0	0	0	0	0	0	0
14.4887	Chico	173	59.1	19.7467	23	10	220	9	41.2	1.14	0	3	3	0	3	0	0	1.28571	0	0	0	0	0	0	0	0
14.4964	Chico										0	0	0	0	0	0	0	0	0	0	0	0	0	0	0	0
14.4997	Chico	163	78.6	29.5833	23	21	165	5.5	34.2	0.35	0	0	0	0	0	0	0	0	0	0	0	0	0	0	0	0
14.5019	Chico	164	52.6	19.5568	30	23	194	9	31.3	0.88	1	2	0	1	0	0	0	0.571429	0	1	0	0	0	0	0	0.142857
14.5047	Chico	171	92.6	19.9422	23	23	154	2	28.2	0	0	1	1	0	0	0	1	0.428571	0	0	1	0	0	0	0	0.142857
14.5047	Chico	166	63.4	23.0077		26	170	3	27.3		0	1	0	0	0	0	0	0.142857	0	1	0	0	0	0	0	0.142857
14.5079	Chico	170	63.4	21.9377	26	15	186	4	26.3	0.38	0	0	0	0	0	0	0	0	0	0	0	0	1	0	0	0.142857
14.5161	Chico	180	75	23.1481	33	33	177	10	34.9	1.03	0	0	0	0	0	0	1	0.142857	1	1	1	0	0	0	0	0.428571
14.5265	Chico	174	71	23.4509		15	150	5	34.7		0	0	0	0	0	0	0	0	0	1	0	0	0	0	0	0.142857
14.527	Chico	172	59.2	20.0108	19	26	163	6.15	25.8	-0.23	0	0	0	0	0	0	1	0.142857	0	1	2	2	0	0	0	0.714286
14.527	Chico	165	50.9	18.6961	20	15	186	8.3	26.3	0.05	1	1	1	0	1	0	0	0.571429	1	1	1	0	0	0	0	0.428571
14.5402	Chico	176	67.9	21.9202		8	160	5	35.7		0	0	0	1	0	0	0	0.142857	0	1	0	0	0	0	1	0.285714
14.5407	Chico	162	49.3	18.7852	30	15	165	8.5	20.4	0.16
14.5462	Chico	172	57	19.2672	28	21	230	9	38.4	1.39	0	0	0	0	0	0	0	0	0	0	0	0	0	0	0	0
14.5512	Chico	183	71.3	21.2906		18	165	7	29		0	0	0	0	0	0	0	0	0	0	0	0	1	0	0	0.142857
14.5512	Chico	172	64.5	21.8023	22	10	195	8	31.5	0.46	1	2	1	1	0	1	1	1	1	2	1	1	1	0	0	0.857143
14.5512	Chico	174	61.3	20.2471	27	17	226	9	44.8	1.56	0	0	0	0	0	0	0	0	0	0	0	0	0	0	0	0
14.5539	Chico	186	57.3	16.5626		13	175	5	27.5
14.5599	Chico	164	51.9	19.2965	30	4	219	6	35.8	1.29	0	0	0	0	0	0	0	0	0	1	0	0	0	0	0	0.142857
14.5708	Chico	175	91.9	30.0082	23	10	175	5	18.2	-0.22	0	2	4	0	0	1	1	1.14286	0	0	0	0	0	0	0	0
14.5731	Chico	175	69.4	22.6612	14	4	150	2.5	29.8	-0.46	0	0	0	0	0	0	0	0	0	0	0	0	0	0	0	0
14.5731	Chico	174	56.4	18.6286		18	180	8	24.2		0	1	0	0	0	0	1	0.285714	0	0	0	0	0	0	0	0
14.5922	Chico	173	47.8	15.9711	21	5	184	4.5	22.1	-0.09	0	0	0	0	0	0	0	0	0	0	0	0	0	0	0	0
14.5977	Chico	185	74.4	21.7385	19	8	189	6	29.4	0.15	0	0	0	0	0	0	0	0	0	0	0	0	0	0	0	0
14.6037	Chico	170	67.5	23.3564	17	15	220	9.05	34.9	0.56	0	1	1	0	0	0	0	0.285714	0	0	0	0	0	0	0	0
14.6141	Chico	172	54.8	18.5235	27	4	186	5	32.5	0.69	0	0	0	0	0	0	0	0	0	0	0	0	1	0	0	0.142857
14.6251	Chico	173	58	19.3792		23	195	7.5	27.8		0	0	0	0	0	1	0	0.142857	0	0	0	0	0	0	0	0
14.6442	Chico	165	46.8	17.1901		17	160	5.5	23		0	0	0	0	0	0	0	0	0	0	0	0	0	0	0	0
14.6475	Chico	176	62.6	20.2092	25	17	218	7	42.3	1.28
14.6497	Chico	154	34.4	14.505	20	9	186	5	24	-0.04	1	3	2	1	0	0	0	1	1	1	1	0	0	0	1	0.571429
14.653	Chico	175	56.7	18.5143	31	6	210	6	37.6	1.34	0	0	0	0	0	0	0	0	0	0	0	0	0	0	0	0
14.6661	Chico	169	53.8	18.8369		20	160	5	27.2		0	0	0	0	0	0	0	0	0	0	0	0	0	0	0	0
14.6771	Chico	179	59.4	18.5387		11	240	11	36		0	0	0	0	0	0	0	0	0	1	0	0	0	0	0	0.142857
14.6907	Chico	175	67.5	22.0408	18	15	196	4.5	38.7	0.55	0	0	1	0	0	0	0	0.142857	0	0	0	0	0	0	0	0
14.6907	Chico										0	0	0	0	0	0	0	0	0	0	0	0	0	0	0	0
14.694	Chico	179	59.2	18.4763	17	4	185	6.4	20.1	-0.38	0	1	1	0	0	0	0	0.285714	0	0	0	0	0	0	0	0
14.6962	Chico	174	62.3	20.5774		25	190	8.5	43		0	0	0	0	0	0	0	0	0	0	0	0	0	0	0	0
14.6962	Chico										0	1	0	0	0	0	0	0.142857	0	0	0	0	0	0	0	0
14.6962	Chico										0	0	0	0	0	0	0	0	0	1	0	0	0	0	0	0.142857
14.6968	Chico	171	54.3	18.5698	17	30	215	7.5	48.6	1.08	0	1	0	0	0	0	0	0.142857	0	1	1	0	0	1	0	0.428571
14.7023	Chico										1	1	1	2	1	1	0	1	3	1	1	1	0	1	0	1
14.705	Chico	173	59	19.7133	23	15	207	9	29.8	0.55
14.7077	Chico	174	56.7	18.7277	26	15	167	9	28.8	0.31	0	0	0	0	0	0	0	0	0	0	0	0	0	0	0	0
14.7187	Chico	174	58.9	19.4544	27	17	228	10.1	32.1	1.06	0	0	1	0	0	0	0	0.142857	0	0	1	0	0	0	0	0.142857
14.7236	Chico	173	55.1	18.4102	21	5	160	3	32.5	0.12	0	0	0	0	1	0	0	0.142857	0	0	0	0	0	0	0	0
14.7263	Chico	171	93.1	19.7286	21	10	140	2	32.8	-0.05	0	0	0	0	0	0	0	0	0	0	0	0	0	0	0	0
14.7296	Chico	175	61.1	19.951	27	18	208	6.25	42.7	1.31	1	1	0	0	0	0	0	0.285714	1	0	0	0	0	0	0	0.142857
14.7345	Chico	184	66.5	19.642		14	170	5	37.9		0	2	1	0	0	0	0	0.428571	0	0	0	0	0	0	0	0
14.7427	Chico	166	53.9	19.5602	35	4	234	9	39.3	1.84	0	0	0	0	0	0	0	0	0	0	0	0	0	0	0	0
14.7482	Chico	174	75.4	24.9042	19	13	194	3	39.9	0.63	0	1	0	0	0	0	0	0.142857	0	0	0	0	0	0	0	0
14.7537	Chico	172	53.1	17.9489		18	215	7	30.6
14.7543	Chico	162	38	14.4795	32	22	210	7.3	20.7	0.69	0	0	0	0	0	0	0	0	0	0	0	0	0	0	0	0
14.7625	Chico	174	85	28.075	29	15	165	4.25	39.1	0.88	1	0	1	1	0	1	1	0.714286	1	1	0	1	0	0	0	0.428571
14.7701	Chico	178	55.5	17.5167		5	200	8.5	37.5		1	1	1	1	0	0	0	0.571429	1	1	1	1	0	0	0	0.571429
14.7729	Chico	174	66.2	21.8655		12	187	4	42.1		0	0	1	1	0	0	0	0.285714	0	1	0	0	0	0	0	0.142857
14.7893	Chico	174	70	23.1206	20	8	198	5.5	32.1	0.4	0	0	0	0	0	0	0	0	0	0	0	0	0	1	0	0.142857
14.7953	Chico	158	58.2	23.3136	22	14		4	28.5		0	0	0	0	0	0	0	0	0	0	0	0	0	0	1	0.142857
14.8112	Chico										0	0	1	0	0	0	0	0.142857	1	0	0	0	0	0	0	0.142857
14.82	Chico	152	41.1	17.7891	20		117		10.3	-1.24
14.8227	Chico	156	66.7	27.408	37	11	150	6.5	23.6	0.53	0	0	0	0	0	0	0	0	0	0	0	0	0	0	0	0
14.8413	Chico	176	56.6	18.2722		16	190	7	42.1		0	0	0	0	0	0	0	0	0	0	0	0	0	0	0	0
14.8495	Chico	181	62.2	18.986		29	190	8	29		0	0	0	0	0	0	0	0	0	0	0	0	0	0	0	0
14.8522	Chico	164	44.8	16.6568		18	190	6	22.3		0	0	0	0	0	0	0	0	0	1	3	0	0	0	1	0.714286
14.855	Chico	176	59	19.047		25	220	7	38.8		1	1	1	0	0	0	0	0.428571	0	1	1	0	0	0	0	0.285714
14.8611	Chico	176	45.6	14.7211	30	17	170	7.5	32.1	0.69
14.8665	Chico				27	10	182	3.3	27	0.42	4	4	4	4	0	0	4	2.85714	4	2	1	2	0	0	0	1.28571
14.8693	Chico	168	46.2	16.369	13	9	260	5.3	24.1	0.26	0	0	0	0	0	0	0	0	0	4	4	4	0	1	4	2.42857
14.8714	Chico	199	72.4	18.2824		5	195	6	36.7		0	0	0	0	0	0	0	0	0	0	0	0	0	0	0	0
14.8802	Chico	165	51.5	18.9164	20	13	161	4.5	23.7	-0.28	0	0	0	0	0	0	0	0	0	0	0	0	0	0	0	0
14.8851	Chico	179	65	20.2865		14	210	7	36.3		0	1	0	0	0	0	0	0.142857	0	1	0	0	0	0	0	0.142857
14.8857	Chico	164	49.7	18.4786	16	8	194	5.1	25.5	-0.12	0	0	0	0	0	0	0	0	0	0	0	0	0	0	0	0
14.8878	Chico	186	65	18.7883		25	260	8	42.1		0	1	0	0	0	0	0	0.142857	0	1	0	0	0	0	0	0.142857
14.8884	Chico	176	57.2	18.4659	35	0	190	10			1	1	0	1	0	0	1	0.571429	0	0	0	0	0	0	0	0
14.9185	Chico	172	61.7	20.8559	22	10	193	10.05	27.5	0.27	0	0	0	0	0	0	1	0.142857	0	0	0	0	0	0	0	0
14.9405	Chico	166	58.6	21.2658	18	7	171	8.47	26.3	-0.19	0	0	0	0	0	0	0	0	0	0	0	0	0	0	0	0
14.9541	Chico	162	43.3	16.499	28	12	181	9	22.2	0.27	0	0	0	0	0	0	0	0	0	0	0	0	0	0	0	0
14.9624	Chico	163	56.8	21.3783	19	7	155	3.5	37	0.16
14.9651	Chico	165	67	24.6097	21	9	190	6.33	30.3	0.31	1	1	0	0	0	0	0	0.285714	0	1	1	0	0	0	0	0.285714
14.9672	Chico	169	50.5	17.6815	26	28	180	6	26.3	0.32	0	0	1	0	0	0	0	0.142857	0	0	0	1	0	0	0	0.142857
14.9726	Chico	178	58.1	18.3373	29	10	190	9	30.9	0.77	0	0	0	0	0	0	0	0	0	0	0	0	0	0	0	0
14.9781	Chico										0	0	3	0	0	2	0	0.714286	0	0	0	0	0	0	0	0
14.9788	Chico	172	65.1	22.0051	25	13	192		33.1	0.66	1	1	4	0	0	0	1	1	1	1	2	0	1	0	1	0.857143
14.9808	Chico	163	50.5	19.0071	29	38	230	6.5	29.1	1.06	0	1	1	0	0	0	1	0.428571	1	1	0	0	0	0	0	0.285714
14.9815	Chico	169	61.3	21.4628	41	25	270	4.25	37.2	2.41	1	3	4	2	0	1	4	2.14286	1	2	1	3	0	0	1	1.14286
14.9836	Chico										0	0	0	0	0	0	0	0	0	0	0	0	0	0	0	0
14.9843	Chico	166	73.5	26.673	37	27	190	9.5	43	1.7	0	0	0	0	0	0	4	0.571429	0	0	0	0	0	0	0	0
14.9843	Chico	171	55	18.8092	28	15	175	9.5	22	0.21
14.9863	Chico	172	77.9	26.3318	30	23	150	6	39.7	0.82	0	0	0	0	0	0	0	0	0	0	0	0	0	0	0	0
14.9897	Chico	183	83.2	24.844	27	15	176	6.3	27.7	0.4
15	Chico	180	69.3	21.3889		20	168	7	23		1	2	2	0	1	0	1	1	1	1	1	0	0	0	0	0.428571
15.0007	Chico	172	64.7	21.8699	22	15	185	6.5	30.7	0.33	1	4	4	1	0	0	1	1.57143	1	4	1	2	1	0	0	1.28571
15.0137	Chico	174	56.6	18.6947		25	210	8	37.8		0	0	0	0	0	0	0	0	0	0	1	0	0	0	0	0.142857
15.0144	Chico	174	94.4	31.1798	30	15	165	4	35.2	0.77	0	1	1	0	0	0	1	0.428571	1	1	1	1	1	1	0	0.857143
15.0219	Chico	171	63.3	21.6477		9	190	7.5	33.3		0	0	1	0	0	0	0	0.142857	0	1	1	0	0	0	0	0.285714
15.0281	Chico	159	52	20.5688	27	16	203	7	26.1	0.58	0	0	1	0	0	0	0	0.142857	0	1	0	0	0	0	0	0.142857
15.0335	Chico	160	45.5	17.7734	40	3	198	11.5	22.2	1.08	1	4	4	0	0	0	0	1.28571	0	1	0	0	0	0	0	0.142857
15.039	Chico	165	48.6	17.8512					8.8		0	4	0	0	0	0	0	0.571429	0	0	0	0	0	0	0	0
15.0418	Chico	168	71.2	25.2268	33	15	170	4	35.1	0.97	2	4	4	1	0	0	1	1.71429	4	3	1	1	0	0	1	1.42857
15.0472	Chico	183	76.7	22.903	24	25	150	2.75	34.3	0.27	0	0	2	1	1	0	4	1.14286	0	0	0	0	0	1	0	0.142857
15.05	Chico	166	58.3	21.1569	40	16	226	6.25	40.8	2.1	0	0	1	0	0	0	0	0.142857	1	1	0	1	0	0	0	0.428571
15.0527	Chico	158	61.7	24.7156	32	11	175	4.5	24	0.51	0	1	0	0	0	0	0	0.142857	0	1	0	0	0	0	0	0.142857
15.0547	Chico	175	100.9	17.1892	22	8	140	3	34.6	0.08	1	1	2	1	1	1	1	1.14286	1	1	1	1	0	0	1	0.714286
15.0554	Chico	162	47.2	17.9851	31	5	246	6	25.7	1.17	0	3	0	0	0	0	0	0.428571	0	2	0	0	0	0	0	0.285714
15.0602	Chico	176	56.7	18.3045	26	8	225	5.5	31.8	0.96	0	0	0	0	0	0	0	0	0	0	0	0	0	0	0	0
15.0664	Chico	165	53.2	19.5409				8	29
15.0712	Chico	164	53.9	20.0402	29	11	195	9	34.3	0.95	0	1	0	0	0	0	0	0.142857	1	1	0	0	0	0	0	0.285714
15.0746	Chico	176	72.7	23.4698	26	20	156	6.5	29.6	0.24	1	1	1	0	0	0	3	0.857143	1	2	1	0	0	1	1	0.857143
15.0821	Chico	167	62	22.231		15	170	6	15.4
15.0848	Chico	176	66.6	21.5005		21	160	6.5	38
15.0903	Chico	176	61.3	19.7895		24	190	7	41.1
15.0938	Chico	155	57.3	23.8502	38	14	190	10	23.9	0.97	1	1	0	0	0	0	0	0.285714	0	1	0	0	0	1	0	0.285714
15.0965	Chico	166	53.4	19.3787	36	30	230	9	40.5	1.91	0	1	2	0	1	0	1	0.714286	1	2	1	0	0	0	0	0.571429
15.104	Chico	182	68.5	20.6799		27	210	10	46.2		0	2	0	0	0	0	0	0.285714	0	1	1	0	0	0	0	0.285714
15.1047	Chico	177	82.8	26.4292	33	11	182	7.5	36.1	1.13	0	1	1	0	0	0	0	0.285714	1	1	0	0	0	0	0	0.285714
15.1075	Chico	163	49	18.4425	39	2	170	7.5	25.2	0.89	0	0	0	0	0	0	0	0	0	0	0	0	0	0	0	0
15.1102	Chico				15	26	170	8
15.1157	Chico	179	62.1	19.3814	33	7	241	9.3	38.3	1.76	1	0	0	0	0	0	0	0.142857	0	1	0	0	0	0	0	0.142857
15.1232	Chico	173	85	28.4005		13	180	5.5	39.4
15.1239	Chico				15	23	146	3
15.1259	Chico	174	53.2	17.5717		35	190	7	26.7		0	0	0	0	0	0	0	0	0	0	0	0	0	0	0	0
15.1294	Chico	160	48.4	18.9062	28	8	209	6.75	33.1	0.98	0	0	0	0	0	0	0	0	1	0	0	0	0	0	0	0.142857
15.1314	Chico	184	125.1	36.9506	19	26	122	2.5	34	-0.27	0	0	0	0	0	0	0	0	0	0	0	0	0	0	0	0
15.1341	Chico	168	65.6	23.2426	22	29	226	8.5	43.3	1.23	0	0	0	0	0	0	0	0	0	0	0	0	0	0	0	0
15.1368	Chico	175	65.6	21.4204		5	180	9	27.9		1	1	0	0	0	0	0	0.285714	1	1	0	0	0	0	0	0.285714
15.1458	Chico				30	0	199	8.2
15.1505	Chico	179	63	19.6623		28	200	8	43.5		0	0	0	0	0	0	0	0	0	0	0	0	0	0	0	0
15.1513	Chico	176	108	34.8657	23	19	187	2.4	43.2	0.92	0	0	0	0	0	0	0	0	0	0	0	0	0	0	0	0
15.156	Chico	163	44.9	16.8994		18	175	6	25.8
15.1752	Chico	173	55.9	18.6775	35	3	222	6	31	1.39	0	0	0	0	0	0	0	0	0	0	0	0	0	0	0	0
15.1752	Chico	167	55.1	19.7569	24	10	165	7	26	0.06	0	1	0	0	0	1	0	0.285714	0	1	1	0	0	0	0	0.285714
15.1786	Chico	170	51.3	17.7509	24	23	219	6.18	29.1	0.69	0	0	0	0	0	0	0	0	0	0	0	0	0	0	0	0
15.1896	Chico	173	60.2	20.1143	35	14	228	10	38.7	1.76	0	0	0	0	0	0	0	0	0	0	0	0	1	0	0	0.142857
15.1923	Chico	178	93	29.3524	16	15	140	2	32.1	-0.35	0	0	0	0	0	0	0	0	0	0	0	0	0	0	0	0
15.1978	Chico	171	52	17.7832	35	1	225	8	24.8	1.16	0	4	4	0	1	1	0	1.42857	4	2	4	4	1	2	1	2.57143
15.1978	Chico	171	44.7	15.2868	37	0	185	8	32.8	1.23	0	1	0	0	1	0	0	0.285714	1	2	1	0	0	0	0	0.571429
15.206	Chico	170	61.5	21.2803	40	27	200	10.5	28.7	1.36	0	0	2	0	1	0	2	0.714286	1	0	0	0	0	0	0	0.142857
15.2107	Chico	168	65.5	23.2072	25	0	141	8	26	-0.1	0	0	1	1	0	0	1	0.428571	0	0	0	1	0	0	1	0.285714
15.2271	Chico	171	85.8	29.3424	22	18		3.5	35.4		0	0	0	0	1	1	0	0.285714	0	0	0	0	0	0	0	0
15.2299	Chico	175	97.1	18.5609	17	24	195	5.5	47.2	0.84	0	0	0	0	0	0	2	0.285714	0	0	0	0	0	0	0	0
15.2326	Chico	187	64.7	18.5021	19	15	142	7.5	27.9	-0.34	1	0	1	0	0	1	0	0.428571	0	0	0	0	0	0	0	0
15.2334	Chico	174	74	24.4418	26	8	187	6	31.3	0.59	0	2	1	0	0	1	0	0.571429	0	1	4	0	0	1	0	0.857143
15.2498	Chico	179	79	24.6559	29	12	160	5	34.5	0.64	0	0	0	0	0	0	0	0	0	0	0	0	1	0	0	0.142857
15.2545	Chico	172	59.7	20.1798	23	2		9	33.4		0	0	0	0	0	0	0	0	0	0	0	0	0	0	0	0
15.2553	Chico	164	67.1	24.9479	31	7	200	5	23.4	0.66	0	1	0	0	1	0	0	0.285714	0	0	1	0	1	0	0	0.285714
15.26	Chico	175	59.3	19.3633	32	16	185	9.5	36.4	1.11	0	0	0	0	0	0	0	0	0	0	0	0	0	0	0	0
15.2737	Chico	178	57.7	18.2111	15	25	130	8	31.3	-0.53	0	0	0	0	0	0	0	0	0	0	0	0	0	0	0	0
15.2882	Chico	178	71	22.4088	34	22	190	7.5	46.7	1.69	1	2	1	1	1	0	1	1	1	1	0	0	0	0	0	0.285714
15.2964	Chico	171	80	27.3588	27	10	170	3.3	33.4	0.58	1	4	1	1	1	1	1	1.42857	1	1	0	1	0	0	0	0.428571
15.3038	Chico										0	1	1	0	0	0	1	0.428571	0	0	0	0	0	0	0	0
15.312	Chico	183	72	21.4996		5	180	6	36.1		1	0	2	0	0	0	1	0.571429	0	0	0	0	0	0	0	0
15.3147	Chico	162	59.1	22.5194		15	160	7.5	24.2
15.3175	Chico	179				25	100		36.4
15.321	Chico	157	47.1	19.1083	32	3	183	11	20.9	0.45	0	0	0	0	0	0	0	0	0	0	0	0	0	0	0	0
15.3265	Chico	172	78.9	26.6698	24	21	202	9.3	35.4	0.79
15.3366	Chico	176	65.1	21.0163	34	6	175	7.5	38.1	1.2	0	0	0	0	0	0	0	0	0	0	0	0	0	0	0	0
15.3374	Chico	173	58.5	19.5463	33	12	230	11.3	27.3	1.2	1	4	1	0	0	0	1	1	1	3	1	0	0	0	1	0.857143
15.3511	Chico	166	60	21.7738	24	15	190	5	41.2	0.92
15.3539	Chico	180	59.7	18.4259	33	15	225	9.5	34.9	1.47	0	0	1	1	0	0	1	0.428571	1	1	0	0	0	0	0	0.285714
15.3558	Chico	167	66.2	23.737	30	19		8	30.1		0	1	1	0	0	0	1	0.428571	0	0	1	0	0	0	1	0.285714
15.3566	Chico	164	84.5	31.4173	20	5	130	3.25	30.6	-0.28	1	1	0	0	0	0	0	0.285714	1	1	1	0	1	0	1	0.714286
15.364	Chico	169	49.9	17.4714	31	10	161	9	39.6	0.97	0	0	0	0	0	0	0	0	0	0	0	0	0	0	0	0
15.3676	Chico				35	15	220	12			1	1	4	1	1	0	0	1.14286	1	1	1	1	1	1	1	1
15.3695	Chico										0	0	0	0	0	0	0	0	0	0	0	0	0	0	0	0
15.3703	Chico	173	55.1	18.4102	33	9	230		31.7	1.38
15.3758	Chico	166	59.4	21.5561	34	17	234	9.5	29.3	1.38	1	1	0	0	0	1	0	0.428571	1	3	1	0	0	1	1	1
15.3777	Chico	173	92.1	20.3951	22	28	180	3	37.9	0.59	0	4	4	1	0	0	0	1.28571	0	1	0	0	0	0	0	0.142857
15.3777	Chico	177	89.2	22.2456	26	16	173	3.5	44.1	1	0	0	1	0	0	0	0	0.142857	0	0	0	0	0	0	0	0
15.3812	Chico	165	43.1	15.831	15	0	182	7.08	19	-0.56	0	0	0	0	1	1	0	0.285714	0	0	1	0	0	1	0	0.285714
15.3859	Chico	169	40.3	14.1102	24	3	157	6	18.5	-0.32	0	0	2	0	0	1	0	0.428571	1	2	0	0	0	4	1	1.14286
15.3867	Chico				15	30	125	3			3	2	3	2	4	3	3	2.85714	2	3	0	3	3	3	3	2.42857
15.3914	Chico	175	68.3	22.302	30	38	140	9.5	44.2	0.91	0	0	0	0	0	0	0	0	0	0	0	0	0	0	0	0
15.4004	Chico	167	68.4	24.5258	32	10	220	7	29.1	1.13	0	1	1	0	0	0	1	0.428571	1	4	4	4	1	1	0	2.14286
15.4086	Chico	179	61.5	19.1942	29	30	200	5	33.4	0.96	0	0	0	0	0	0	0	0	0	0	0	0	0	0	0	0
15.4086	Chico	166	55	19.9594		19		6.5	35.5		0	0	1	0	0	0	1	0.285714	3	4	4	3	1	2	3	2.85714
15.4086	Chico
15.4141	Chico	167	45.2	16.2071	24	3	140	3.5	23	-0.29	1	1	4	4	1	4	0	2.14286	0	1	0	0	0	1	0	0.285714
15.416	Chico	180	74.4	22.963	15	10	143	8	20.7	-0.85	1	1	1	0	0	0	1	0.571429	0	1	0	0	0	0	0	0.142857
15.4242	Chico	173	88.3	29.5032	24	22		7	30.2		0	1	0	0	0	0	0	0.142857	0	0	0	0	0	0	0	0
15.4305	Chico	170	53.9	18.6505	21	15	167	7	29.7	0.07	0	0	0	0	0	0	0	0	0	0	0	0	0	0	0	0
15.4324	Chico	158	51.3	20.5496	32	31	202	9.5	29.7	0.99	0	0	0	0	0	0	0	0	0	0	0	0	0	0	0	0
15.4324	Chico	179	75.6	23.5948	25	17	173	9.5	38.5	0.71	0	1	1	0	0	0	1	0.428571	0	0	1	0	0	0	0	0.142857
15.4324	Chico	183	72.8	21.7385	30	30		9.5	43.9		0	0	1	0	0	1	0	0.285714	1	1	1	1	0	0	0	0.571429
15.436	Chico	170	55.9	19.3426	24	25	198	9.55	29.7	0.52	0	0	1	0	0	0	1	0.285714	0	1	1	1	1	0	0	0.571429
15.4379	Chico	175	79.9	26.0898	29	21	187	8.5	45.6	1.35	0	0	0	0	0	0	0	0	0	0	0	0	0	0	0	0
15.4406	Chico	171	71.7	24.5204	22	29	140	7	28.2	-0.18	0	0	0	0	0	0	0	0	0	0	0	0	0	0	0	0
15.4433	Chico	168	51.1	18.1052	35	15	190	10	19	0.6	0	1	2	0	0	2	2	1	0	0	1	0	0	0	0	0.142857
15.4497	Chico	170	57.6	19.9308	26	24	240	8.5	33	1.15	0	2	1	0	0	3	1	1	0	0	1	0	0	0	0	0.142857
15.4543	Chico	164	54.3	20.1889	30	23	166	9.5	29.7	0.55	0	0	0	0	0	0	0	0	0	0	0	0	0	0	0	0
15.4598	Chico					12	170	6
15.4625	Chico	170	53.2	18.4083	30	27	200	10	35.4	1.1	0	0	0	0	0	0	0	0	0	0	0	0	0	0	0	0
15.4652	Chico	174	56	18.4965	26	14	198	7	44	1.22	0	0	0	0	0	0	0	0	0	0	0	0	0	0	0	0
15.4661	Chico	170	68.3	23.6332	32	28	212	4	48.8	1.87	0	1	4	1	0	1	2	1.28571	1	1	0	0	0	0	0	0.285714
15.4707	Chico	167	49.2	17.6414	18	13	186	3	22.7	-0.21	0	1	0	0	0	1	0	0.285714	0	1	0	0	0	0	0	0.142857
15.4707	Chico	178	103.57	32.6884	28	14	185	4.5	36.3	0.89	0	0	1	0	0	0	0	0.142857	0	1	0	0	1	0	1	0.428571
15.4743	Chico	174	59.6	19.6856	29	8	230	9	30	1.1	0	1	1	0	0	0	1	0.428571	0	0	0	0	0	0	0	0
15.4789	Chico	180	71	21.9136		11	260	8	50.1
15.4871	Chico	181	67	20.4511			223	11	30.3		0	0	0	0	0	0	0	0	0	0	0	0	0	0	0	0
15.4899	Chico	170	50	17.301		12	230	6	30.6		0	0	0	0	0	0	0	0	0	0	0	0	0	0	0	0
15.499	Chico	175	63.2	20.6367	36	6	245	12.3	35.2	1.83	0	0	0	0	1	0	0	0.142857	0	1	0	0	0	0	0	0.142857
15.5118	Chico	174	68.8	22.7243	34	24	227	11	42	1.84	0	0	0	0	0	0	0	0	0	0	0	0	0	0	0	0
15.5154	Chico	168	52	18.424	29	15	180	9.5	34.3	0.82
15.5172	Chico										0	0	0	0	0	0	0	0	0	0	0	0	0	0	0	0
15.5181	Chico	169	55.9	19.5721	31	11	226	7.5	20.9	0.79	0	0	0	0	0	0	0	0	0	1	0	0	0	0	1	0.285714
15.5309	Chico										0	0	0	0	0	0	0	0	1	0	0	0	0	0	0	0.142857
15.5346	Chico	175	67.5	22.0408	34	14	206	8	40.5	1.58	0	1	1	0	0	0	0	0.285714	1	2	1	0	0	0	0	0.571429
15.5446	Chico	191	64.7	17.7353	28	8	189	9	41.2	1.13	1	1	1	0	1	0	0	0.571429	0	0	0	0	0	0	0	0
15.5455	Chico	177	69.4	22.152	27	0	186	4.3	36.6	0.86	0	0	1	0	0	0	0	0.142857	0	0	1	0	0	0	0	0.142857
15.5483	Chico				22	15	180	2.5	45	0.88
15.5565	Chico	172			16	4		2.3	31.3		0	0	1	0	0	0	0	0.142857	1	0	0	0	0	0	0	0.142857
15.5592	Chico				31	10	170	6			0	1	1	1	1	0	1	0.714286	0	1	1	1	1	1	1	0.857143
15.5756	Chico	164	56	20.8209	25	9	210	6	25.6	0.51	0	1	1	0	1	1	0	0.571429	0	0	1	0	0	0	0	0.142857
15.5884	Chico										2	3	2	3	4	2	4	2.85714	4	2	1	2	4	3	2	2.57143
15.6085	Chico	173	62.3	20.8159	21	5	178	6.07	25.8	0.01	1	1	1	1	0	0	1	0.714286	1	1	1	1	0	0	0	0.571429
15.6085	Chico	174	87.7	28.9668	35	20	123	8.3	40.6	0.88	0	4	0	0	0	1	0	0.714286	0	4	0	0	1	1	0	0.857143
15.6167	Chico	168	71.6	25.3685	32	22	207	5	34.9	1.25	0	1	1	0	0	0	0	0.285714	0	1	1	0	1	0	0	0.428571
15.6185	Chico	193	79.2	21.2623	27	15		8	49.4		0	0	0	0	0	0	0	0	1	1	1	1	0	0	1	0.714286
15.6194	Chico	174	98.8	32.6331	24	35	147	3.5	29.1	0.03	0	1	0	0	0	2	3	0.857143	0	2	0	0	0	0	0	0.285714
15.6212	Chico	176	62	20.0155	32	35	206	9.5	35.4	1.26	0	0	0	0	0	0	0	0	0	0	0	0	0	0	0	0
15.6322	Chico	169	53.3	18.6618		18	155	6.5	20.3		0	4	4	1	2	3	0	2	0	3	0	0	0	0	0	0.428571
15.6404	Chico	181	71.7	21.8858	20	30		8	33.1		1	0	0	0	1	0	0	0.285714	0	0	1	1	0	0	0	0.285714
15.6413	Chico	169	59.5	20.8326	37	17	215	9	31.6	1.46	1	2	2	1	1	1	2	1.42857	1	1	0	0	0	1	2	0.714286
15.6413	Chico	164	54.9	20.412	28	15	165	10	28	0.36
15.6431	Chico	165	52.5	19.2837	25	21	113	9.5	31.2	-0.14	0	4	1	1	0	0	0	0.857143	1	2	0	0	0	0	0	0.428571
15.6468	Chico	156	44.8	18.4089	24	19	180	6.5	17.6	-0.15	0	1	0	0	0	0	1	0.285714	0	0	0	0	0	0	0	0
15.6523	Chico	171	72	24.623	31	10	210		33.1	1.15	0	0	0	0	0	0	0	0	0	0	0	0	0	0	0	0
15.6623	Chico	181	83.4	25.4571	25	13	195	9.5	42.7	1.08	0	0	0	0	0	0	0	0	0	0	0	0	0	0	0	0
15.6678	Chico	170	45.6	15.7785	25	10	124	10	24.9	-0.3	0	0	1	0	0	0	1	0.285714	0	0	2	0	1	0	1	0.571429
15.6705	Chico	186	66.5	19.2219	27	13		10	34		0	0	0	0	0	0	0	0	0	0	0	0	0	0	0	0
15.676	Chico	180	65.2	20.1235	27	19		10	27.6		1	1	0	1	0	0	1	0.571429	1	1	0	0	0	0	0	0.285714
15.6934	Chico	190	80.4	22.2715	20	26	203	9.36	38.4	0.71	3	3	3	0	0	0	0	1.28571	4	4	4	0	0	1	0	1.85714
15.6951	Chico										3	3	3	2	3	3	2	2.71429	1	2	2	2	2	3	3	2.14286
15.6979	Chico	172	67.7	22.884	37	4		9	39.5		0	0	0	0	0	0	0	0	0	0	0	0	0	0	0	0
15.7043	Chico	168	68.7	24.341	32	10	188	7.5	36.9	1.16	0	1	0	0	1	0	0	0.285714	1	1	0	1	0	0	0	0.428571
15.707	Chico	175	70.2	22.9224	18	25	175	5	38.5	0.35
15.718	Chico	168	50.9	18.0343	33	13	208	10	28.7	1.06	0	0	0	0	1	0	0	0.142857	0	0	0	0	1	0	0	0.142857
15.7252	Chico	171	54.6	18.6724	27	24	202	9.5	35.8	0.97	0	0	1	0	0	0	0	0.142857	0	0	2	0	0	0	0	0.285714
15.7317	Chico	171
15.7417	Chico	166	61.7	22.3908	27	22		9	29.6		0	3	0	0	0	0	0	0.428571	0	3	1	0	0	0	0	0.571429
15.7454	Chico	175	64.5	21.0612	11	8	202	5.42	32.5	-0.03	0	1	1	1	1	1	1	0.857143	0	1	1	0	1	0	1	0.571429
15.7499	Chico	159	44.6	17.6417		24	150	5.5	27.1		0	1	1	0	1	0	1	0.571429	0	0	0	0	0	0	0	0
15.7526	Chico	167	68.4	24.5258		7	180	3	24.6
15.7728	Chico	180	89.4	27.5926	33	15	185	7	37.8	1.22	1	1	0	0	0	0	0	0.285714	1	1	0	0	1	0	0	0.428571
15.7745	Chico	169	55.3	19.3621	26	3	178	4.5	30.4	0.47	0	0	0	0	0	0	0	0	0	0	0	0	0	0	0	0
15.781	Chico	173	63.5	21.2169	35	16	210		39.3	1.62	0	0	0	0	0	0	0	0	0	0	0	0	0	0	0	0
15.7882	Chico	180	62.3	19.2284	35	22	200	8	38.8	1.51	0	0	0	0	0	0	0	0	0	0	0	0	0	0	0	0
15.7892	Chico	184	82.9	24.4861	25	10	219	6	38.8	1.14	1	1	0	0	1	0	1	0.571429	0	1	0	0	1	0	0	0.285714
15.7892	Chico	180	97.1	29.9691	29	13	120	6	30	0.09	2	2	0	0	2	0	0	0.857143	1	1	0	0	1	0	0	0.428571
15.7964	Chico	172	61.1	20.6531	25	22	180	7	32.4	0.52	0	0	1	0	0	0	0	0.142857	0	0	0	0	0	0	1	0.142857
15.7974	Chico	179	88.9	27.7457	20	1	162	5.5	42.3	0.49	0	0	0	0	0	0	0	0	0	0	0	0	0	0	0	0
15.7974	Chico	178	60	18.937	18	18	150	9.5	33.6	-0.08
15.8001	Chico	170	56.2	19.4464	24		150	1.5	20	-0.32
15.8111	Chico	179	70.4	21.9718	26	13	82	5.75	38.8	-0.06	2	2	2	0	1	0	1	1.14286	1	1	1	0	0	0	1	0.571429
15.8138	Chico	159	49	19.3821	29			5	22.8		0	0	1	0	0	0	1	0.285714	0	0	0	0	0	1	1	0.285714
15.8238	Chico										0	0	0	0	0	0	0	0	0	1	0	0	0	0	0	0.142857
15.8248	Chico	172	81	27.3797	26	26	185		39.9	0.93	0	0	0	0	0	0	0	0	0	0	0	0	0	0	0	0
15.8275	Chico	172	102.3	34.5795	28	10	198	5	41.7	1.23	0	0	0	0	0	0	0	0	0	0	0	0	0	0	0	0
15.8275	Chico	167	68.2	24.4541	24	0	105	5.25	31.4	-0.26	0	0	0	4	0	0	0	0.571429	0	0	0	4	0	0	0	0.571429
15.832	Chico	180	69.4	21.4198	22	13	190	7	35.1	0.56	0	3	0	0	0	0	0	0.428571	0	3	0	0	0	0	0	0.428571
15.833	Chico	167	46	16.494	20	28	148	4	17.8	-0.65	0	0	0	0	0	0	0	0	0	0	0	0	0	0	0	0
15.8374	Chico	166	62.4	22.6448		20	155	4.5	35.7
15.8385	Chico	173	73.8	24.6584	30	6	200	5	33.6	1.03	0	1	0	0	0	0	0	0.142857	0	1	2	0	0	0	1	0.571429
15.8467	Chico	162	60.9	23.2053	33	26	185	6	34.5	1.09	1	1	4	0	1	0	2	1.28571	1	4	1	1	0	1	0	1.14286
15.8484	Chico	163	41.9	15.7703	29	6	210	8.5	24.8	0.7	0	1	0	0	0	0	1	0.285714	0	0	0	0	0	0	0	0
15.8522	Chico				35	21	228	7			0	1	1	0	0	1	0	0.428571	0	0	0	0	0	0	0	0
15.8549	Chico	167	69.1	24.7768	21	7	140	6.5	31.8	-0.09	4	3	4	2	0	2	1	2.28571	3	1	0	0	1	0	0	0.714286
15.8631	Chico	178	68	21.4619	20	8	173	4.57	34	0.25	0	0	0	0	0	0	0	0	1	1	0	0	0	0	0	0.285714
15.8658	Chico
15.8703	Chico	170	51.9	17.9585	21	20	210	4	34.9	0.68	0	1	0	0	0	0	0	0.142857	0	2	1	0	0	0	1	0.571429
15.8768	Chico	191	66.7	18.2835	27	1	179		31.8	0.6
15.8768	Chico
15.8812	Chico	183	84	25.0829	25	3		8	39.5		2	3	1	1	0	2	1	1.42857	1	2	0	1	0	0	0	0.571429
15.8812	Chico	164	55.3	20.5607		25	185	9	27.9
15.8823	Chico	162	53.7	20.4618	33	13	210	12	29.3	1.1	4	4	0	0	0	0	1	1.28571	2	2	0	0	0	0	0	0.571429
15.8867	Chico										1	0	0	0	0	0	0	0.142857	0	0	0	0	0	0	0	0
15.8976	Chico										0	1	0	1	0	0	1	0.428571	1	1	0	0	0	0	0	0.285714
15.9042	Chico	174	54.2	17.902	38	10	250	11	33.9	1.93	0	0	0	0	0	0	0	0	0	0	0	0	0	0	0	0
15.9097	Chico	176	62.2	20.0801		16	234	8.5	28.7		0	0	1	0	0	0	0	0.142857	0	0	1	0	0	0	0	0.142857
15.9097	Chico	168	49.5	17.5383	36	15	189	11.5	31.8	1.18	2	2	2	3	1	0	1	1.57143	4	3	3	2	2	0	0	2
15.9113	Chico	174	58.6	19.3553	28	21		7.5	28.8
15.9124	Chico	178	58.3	18.4005	15	28	157	5	27.8	-0.42
15.9141	Chico	181	59.2	18.0703	30	22	147	8	34.6	0.58	0	0	0	0	0	1	0	0.142857	1	0	0	0	0	0	0	0.142857
15.9151	Chico	185	72.4	21.1541	36	0	180	10.3	34.6	1.21	0	0	0	0	0	0	0	0	0	0	0	0	0	0	0	0
15.9151	Chico	180	63.1	19.4753	37	14	240	11.3	40.7	2.07	1	0	1	1	0	0	1	0.571429	0	0	0	0	0	0	0	0
15.9151	Chico	160	79.9	31.2109					16.8		1	1	1	0	0	0	1	0.571429	0	1	0	0	0	0	0	0.142857
15.9206	Chico	163	51.2	19.2706	22	14	178	9.37	24.6	0.02	0	1	0	0	0	0	0	0.142857	0	0	0	0	0	0	0	0
15.9261	Chico	186	62.1	17.9501	34	7	176	6.75	34.2	1.05	0	0	0	0	0	0	1	0.142857	0	0	1	0	1	0	0	0.285714
15.936	Chico										0	0	0	1	2	0	4	1	0	0	0	0	0	0	0	0
15.9469	Chico	168	62.3	22.0734	23	13	201	9.5	36.9	0.79	0	1	1	1	0	3	0	0.857143	0	0	0	0	0	0	0	0
15.9524	Chico	174	67.4	22.2619		25	210	7	41.4		1	1	1	0	0	0	0	0.428571	1	1	0	0	0	0	0	0.285714
15.9562	Chico	174	55.2	18.2323		15			34.5		1	1	1	1	1	0	0	0.714286	1	1	0	0	2	1	0	0.714286
15.9589	Chico	174	59.3	19.5865	33	20	220	8.3	31.5	1.28	0	0	0	0	0	0	0	0	0	0	0	0	0	0	0	0
15.9661	Chico										0	4	0	0	1	0	0	0.714286	0	1	0	0	0	0	0	0.142857
15.9699	Chico	172	80.6	27.2445	25	17	175	6	31.9	0.45	0	0	0	0	0	0	0	0	0	0	0	0	0	0	0	0
15.9699	Chico	168	68.3	24.1993	35	17	230	13	26.1	1.26	0	4	0	0	0	0	1	0.714286	1	1	1	0	0	0	2	0.714286
15.9836	Chico	170	55	19.0311	28	15	190	10	28.7	0.62
16.0016	Chico	171	57.4	19.63	36	17	206	9.5	30.9	1.29	0	0	0	1	0	0	0	0.142857	0	0	1	0	0	0	0	0.142857
16.0055	Chico	189	107.8	30.1783	17	30	174		30.4	-0.05	0	0	0	0	0	0	0	0	0	0	0	0	0	0	0	0
16.0082	Chico	174	78.6	25.9612	23	15	210	5	35.3	0.81	0	0	0	0	0	0	0	0	0	0	0	0	0	0	0	0
16.0082	Chico
16.011	Chico	174	68.8	22.7243	27	15	231	10.35	42.1	1.5	0	0	0	0	0	0	0	0	0	0	0	0	0	0	0	0
16.0137	Chico	179	76.7	23.9381	30	21	242	10.4	42.7	1.79	0	0	0	0	0	0	0	0	0	0	0	0	0	0	0	0
16.0181	Chico				18	19	131	3			0	0	0	0	0	0	0	0	0	0	0	0	0	0	0	0
16.0411	Chico	173	78.1	26.0951	21	11	155	4.3	26.9	-0.15	1	0	1	0	1	1	3	1	1	1	1	0	1	0	1	0.714286
16.0454	Chico										0	1	1	0	0	0	1	0.428571	0	0	0	0	0	0	0	0
16.0657	Chico	173	81.5	27.2311	26	21	192	6	37	0.88	0	0	0	0	0	0	0	0	0	1	1	0	1	0	0	0.428571
16.0701	Chico	177	70.6	22.535	34	28	220	9.5	38.5	1.63	0	0	0	0	0	0	0	0	1	1	0	0	0	0	0	0.285714
16.0728	Chico	182	59.2	17.8722	28	23	186	8	33.1	0.77	0	0	0	0	0	0	1	0.142857	0	0	2	0	0	0	0	0.285714
16.0728	Chico										0	0	0	0	0	0	0	0	0	0	0	0	0	0	0	0
16.0739	Chico	170	66.1	22.872	21	4	205	6.5	39	0.81	0	0	0	0	0	0	2	0.285714	0	0	0	0	0	0	0	0
16.0849	Chico	168	49.3	17.4674	25	11	201	5.25	30.3	0.63	1	1	0	0	0	0	0	0.285714	1	1	1	0	0	0	0	0.428571
16.0865	Chico	181	63.2	19.2912	32	24	179	9.5	28.2	0.72	0	0	0	0	0	0	1	0.142857	0	4	4	0	0	0	0	1.14286
16.0865	Chico										1	2	2	0	1	1	1	1.14286	0	1	0	0	0	0	0	0.142857
16.0903	Chico	177	119.9	38.2713	20	22	162		35.2	0.2	1	1	1	0	1	1	0	0.714286	1	1	0	0	0	0	0	0.285714
16.0958	Chico	167	55.4	19.8645	30	3	218	6	39.7	1.44	1	0	0	1	1	0	1	0.571429	0	0	0	0	0	0	0	0
16.0985	Chico	180	55.9	17.2531	21	1	180	6.5	34.6	0.4	0	1	1	1	0	0	0	0.428571	0	1	1	0	0	0	0	0.285714
16.1002	Chico										0	0	0	0	0	0	0	0	0	0	0	0	0	0	0	0
16.104	Chico	173	75.2	25.1261	25	26	213	8.5	37.9	1.05	1	2	1	0	1	1	1	1	1	1	1	0	1	1	1	0.857143
16.1138	Chico	193	86.8	23.3026	32	15	175	9.5	27.6	0.66	1	3	3	1	2	0	0	1.42857	0	2	4	0	0	0	1	1
16.1177	Chico				30	13	140				0	0	0	0	0	0	0	0	0	0	0	0	0	0	0	0
16.1275	Chico	168	66.4	23.5261	15	15	170	3	24.8	-0.43	0	0	1	0	0	0	0	0.142857	0	0	1	0	0	0	1	0.285714
16.1385	Chico	166	56	20.3223	31	14	130	10	28.1	0.21	0	3	0	0	0	0	0	0.428571	0	0	0	0	0	0	0	0
16.1424	Chico	175	119.4	38.9878	21	18	145	2.5	41.7	0.37	0	0	3	0	0	1	1	0.714286	0	1	1	0	0	0	0	0.285714
16.1631	Chico	168	61	21.6128	31	32		10	42.1		0	2	1	0	1	0	1	0.714286	0	1	1	0	0	0	0	0.285714
16.1658	Chico	165	84.7	22.9994	22	7	170	2.5	28.8	0.12	0	0	0	0	0	0	0	0	1	0	0	0	0	0	0	0.142857
16.1725	Chico	172	68.6	23.1882	33	20	221	8.36	29.9	1.23	0	0	0	0	0	0	0	0	0	0	0	0	0	0	0	0
16.178	Chico	179	67.6	21.098	31	10	230		43.2	1.75	0	0	0	0	0	0	0	0	0	0	0	0	0	0	0	0
16.1807	Chico	173	89.1	29.7705	34	26	232	9	51.6	2.28	4	2	0	4	0	0	1	1.57143	4	4	4	4	4	4	4	4
16.1889	Chico	189	72	20.1562	24	0	214	8.17	32.2	0.77	0	0	0	0	0	0	0	0	0	0	0	0	0	0	0	0
16.1959	Chico	183	67.1	20.0364	32	17		8	44.2		0	0	0	1	0	0	0	0.142857	0	1	0	0	0	0	0	0.142857
16.1959	Chico	177	64.3	20.5241	27	10	205	10	42.7	1.29	0	0	0	0	0	0	0	0	0	0	0	0	0	0	0	0
16.2042	Chico	183	99.9	18.3367	30	18	195	6	44.2	1.42	0	1	1	0	0	0	0	0.285714	0	0	0	0	0	0	0	0
16.2042	Chico	167	56.2	20.1513	29	12	176	9.5	27.9	0.51	0	1	0	0	0	0	0	0.142857	0	1	0	0	0	0	0	0.142857
16.2053	Chico	182	79.2	23.9102	15	5		4.3	46.8		0	0	0	0	0	0	0	0	1	0	0	0	0	0	0	0.142857
16.2081	Chico	170	65.8	22.7682	34	14	222	6.5	34.2	1.47	1	1	1	0	0	0	0	0.428571	1	1	1	0	1	0	0	0.571429
16.2096	Chico										0	0	0	0	0	0	0	0	0	0	0	0	0	0	0	0
16.2206	Chico	173	62.7	20.9496	26	13		9.5	32.8		0	1	1	1	0	0	2	0.714286	1	1	1	1	0	0	0	0.571429
16.2218	Chico	163	51.8	19.4964	13	13	183	4.3	26.4	-0.35	0	0	0	0	0	0	0	0	0	0	0	0	0	0	0	0
16.2261	Chico	168	48.7	17.2548	29	10	160	6	24.4	0.22	0	0	0	0	0	0	0	0	0	0	0	0	0	0	0	0
16.23	Chico	175	64.4	21.0286	26	24	234	9.35	50.7	1.83	0	0	2	1	0	1	1	0.714286	1	2	1	1	0	1	0	0.857143
16.2409	Chico	170	60.7	21.0035	24	35	228	8.23	44.1	1.39	0	0	0	0	0	0	1	0.142857	0	0	1	0	1	0	0	0.285714
16.2425	Chico	181	83.6	25.5181	31	30	205		44.1	1.56	1	1	1	1	0	1	1	0.857143	1	1	0	1	0	0	0	0.428571
16.2464	Chico	172	77.4	26.1628	36	3	202	6.25	37	1.51	0	1	2	0	0	0	1	0.571429	0	0	0	0	0	0	0	0
16.2507	Chico	184	89	23.2294	20	9	130	4.5	41.4	0.16	0	0	0	0	0	0	0	0	0	0	0	0	0	0	0	0
16.2546	Chico	162	57	21.7193	25	4	206	11.38			1	1	1	0	0	0	1	0.571429	2	3	3	1	1	1	0	1.57143
16.2546	Chico
16.2589	Chico										0	1	0	0	0	0	0	0.142857	0	0	0	0	0	0	0	0
16.2683	Chico	175	73.3	23.9347	27	14	235	7.41	39.1	1.41	0	0	0	0	0	0	0	0	0	0	0	0	0	0	0	0
16.2835	Chico	173	64.1	21.4174	24	7	220	6.5	32.8	0.85	0	0	0	0	0	0	2	0.285714	0	0	0	0	0	0	0	0
16.3149	Chico					33	180	8			0	0	1	1	0	0	1	0.428571	2	2	1	1	0	0	0	0.857143
16.3231	Chico	172	86.6	29.2726	24	11	138		22.5	-0.33	0	0	1	0	0	0	0	0.142857	0	0	0	0	0	0	0	0
16.3422	Chico	180	73.8	22.7778	38	15	241	10.3	48.6	2.46	1	1	1	1	0	0	1	0.714286	2	1	1	2	0	0	0	0.857143
16.3519	Chico	179	65.4	20.4113	20	28	175	6	34.6	0.3	0	0	0	0	0	0	0	0	0	0	0	0	0	0	0	0
16.3519	Chico										0	0	0	0	0	0	0	0	0	0	0	0	0	0	0	0
16.3669	Chico	173	60.2	20.1143	20	28	257	8.45	36.3	1.12	0	0	0	0	0	0	0	0	0	0	0	0	0	0	0	0
16.3778	Chico	177	109.5	34.9516	22	13	131	2.36	25.7	-0.37	1	3	1	1	1	1	1	1.28571	0	3	0	1	0	0	0	0.571429
16.386	Chico	179	67.9	21.1916	34	30	230	10.3	42.1	1.87	1	4	4	4	1	0	1	2.14286	0	0	0	0	1	0	0	0.142857
16.3888	Chico	177	59	18.8324	27	9	240	8.3	25.4	0.89	1	2	1	1	1	0	1	1	1	1	1	1	0	0	1	0.714286
16.4025	Chico	166	71.8	26.056	29	1	162	6.25	31	0.51	0	0	0	0	0	0	2	0.285714	0	0	0	0	0	0	0	0
16.4039	Chico	174	56.3	18.5956	32	29	240	8	37	1.64	0	0	0	0	0	0	0	0	0	0	0	0	0	0	0	0
16.4052	Chico	169	65.8	23.0384	31	34	248	13.08	38.5	1.72	0	1	1	0	0	0	0	0.285714	0	1	1	0	0	1	0	0.428571
16.4216	Chico	174	58.4	19.2892	29	13	220	6.3	30	1.01	0	0	0	0	0	0	0	0	0	0	1	0	0	0	0	0.142857
16.4298	Chico	178	62	19.5682	22	23	240	10	38.8	1.17	0	0	0	0	0	0	0	0	0	0	0	0	0	0	0	0
16.4368	Chico	191	134.9	36.9782	23	5	150	3	54.9	1.07	0	0	0	0	0	0	0	0	0	0	0	0	0	0	0	0
16.4381	Chico	175	66.2	21.6163	27	19	266	9.35	34.3	1.5	0	1	0	0	0	0	0	0.142857	0	0	0	0	0	0	0	0
16.4463	Chico	173	64.4	21.5176					32.4
16.449	Chico	179	55.3	17.2591	15	28	212	10	38.1	0.51
16.4572	Chico	178	67.5	21.3041	23	19	166	8.1	34.6	0.38	0	0	0	0	0	0	0	0	0	0	0	0	0	0	0	0
16.4696	Chico										0	0	0	0	0	0	0	0	0	0	0	0	0	0	0	0
16.4833	Chico	174	67.8	22.394	19	21	186	7.5	26.9	0.02	0	0	0	0	0	0	0	0	0	0	0	0	0	0	0	0
16.4873	Chico	170	75	25.9516	29	11	212	6.25	48.2	1.69	1	1	1	1	0	0	1	0.714286	4	1	0	0	0	0	0	0.714286
16.4901	Chico	166	93.6	33.9672	25	19	130	4.3	27.8	-0.13	0	0	0	0	0	0	0	0	0	3	1	0	0	0	0	0.571429
16.4915	Chico	172	59.8	20.2136	25	7	174	9	45.2	1	1	4	1	0	0	0	0	0.857143	0	0	0	0	0	0	0	0
16.4928	Chico	180	58.9	18.179	23	8	220	11.38	37.9	1.01	0	0	0	0	0	0	0	0	0	0	0	0	0	0	0	0
16.4943	Chico	182	79.9	24.1215	20	0	160	5	36	0.22
16.4943	Chico	184	70.1	20.7053	19	11	195	6	47.3	0.95
16.5038	Chico	177	67.7	21.6094	23	7	166	6.1	34.3	0.36	0	0	0	0	0	0	0	0	0	0	0	0	0	0	0	0
16.5052	Chico	167	42.8	15.3466	22	10	198	4.5	26.6	0.28	0	0	0	0	0	0	0	0	0	0	0	0	1	0	0	0.142857
16.5065	Chico	174	59.3	19.5865	32	10	210	7	32.8	1.19	0	0	0	0	0	0	0	0	0	0	0	0	0	0	0	0
16.5065	Chico	180	66.5	20.5247	24	9	253	10.14	43.8	1.61	0	4	0	0	0	1	1	0.857143	0	0	0	0	0	1	0	0.142857
16.5298	Chico	169	64.1	22.4432		15	200	7	26.6
16.5311	Chico	156	38.3	15.738	15	9	135	1.5	17.1	-1.07	0	0	0	0	0	0	0	0	0	0	0	0	0	0	0	0
16.5366	Chico	185	51.7	15.1059	25	16	189	8	30.7	0.53	0	0	0	0	0	0	0	0	0	0	0	0	0	0	0	0
16.5476	Chico	173	55.1	18.4102	23	0	222	7	32.1	0.79	0	0	0	0	0	0	0	0	0	0	0	0	0	0	0	0
16.5476	Chico	170	65	22.4913	24	8	181	7	33.4	0.52	0	0	0	0	0	0	0	0	0	0	0	0	0	0	0	0
16.549	Chico	166	64.9	23.552	29	26	198	6.5	37.5	1.11	0	0	0	0	0	0	0	0	0	0	0	0	0	0	0	0
16.553	Chico	172	54.8	18.5235	34	4	214	8.5	36.4	1.49	0	0	0	0	0	0	0	0	0	0	0	0	0	0	0	0
16.553	Chico	172	46.6	15.7518	32	14	234	9.22	25.8	1.12	2	2	1	1	0	0	1	1	1	2	1	0	0	0	0	0.571429
16.5818	Chico	165	59	21.6713	26	15	205	7	32.5	0.81	0	0	0	0	0	0	0	0	0	0	0	0	0	0	0	0
16.5846	Chico	163	87.1	21.4858	20	19	145	2	33.3	-0.03	0	0	0	0	0	0	0	0	0	0	0	0	0	0	0	0
16.5886	Chico	170	65.3	22.5952		21		10.3	33.1		0	0	0	0	0	0	0	0	0	0	0	0	0	0	0	0
16.5969	Chico	179	70.2	21.9094	35	10	220	12	28.5	1.27	1	2	1	0	1	0	1	0.857143	0	1	0	0	0	0	0	0.142857
16.5982	Chico										0	0	0	0	0	0	0	0	0	0	0	0	0	0	0	0
16.5996	Chico	182	67.3	20.3176	32	0	250	5.3	40.9	1.89	1	4	2	1	1	0	0	1.28571	4	4	0	1	0	0	0	1.28571
16.6105	Chico	168	48.9	17.3257	24	3	170	7.45	29.9	0.27	1	1	1	1	1	1	1	1	1	1	1	1	1	1	1	1
16.6284	Chico	171	59.7	20.4165	35	3	223	11.5	40.6	1.8	1	3	3	1	0	0	2	1.42857	1	4	0	2	0	0	0	1
16.6297	Chico
16.6352	Chico	168	48.3	17.1131	23	10	205	6.47	33.1	0.67	0	1	1	0	0	0	1	0.428571	0	1	1	0	0	0	1	0.428571
16.6352	Chico	180	57.9	17.8704	30	16	222	8	34.6	1.27	0	0	1	0	0	0	1	0.285714	3	3	1	0	0	0	1	1.14286
16.6434	Chico	186	61.6	17.8055	30	16	179	7.07	28.8	0.63	0	0	1	0	0	0	1	0.285714	1	0	1	0	0	0	0	0.285714
16.6557	Chico	170	66.9	23.1488	31	18	187	11	34.9	1.01	0	0	0	0	0	0	0	0	0	0	0	0	0	0	0	0
16.668	Chico	180	63.3	19.537	34	11	211	9	34.5	1.38	0	1	0	0	0	0	0	0.142857	1	1	1	1	0	1	0	0.714286
16.679	Chico	182	70.6	21.3139	24	25	198	6.07	40.6	0.97	0	1	3	1	0	1	4	1.42857	1	1	3	4	1	1	1	1.71429
16.6872	Chico	175	60	19.5918	32	33	229	10.05	38.7	1.61	0	0	0	0	0	0	0	0	0	0	0	0	0	0	0	0
16.6872	Chico	187	77.9	22.2769	32	23	215	10.35	44.7	1.73	0	3	0	0	1	1	1	0.857143	1	1	0	0	0	0	0	0.285714
16.6899	Chico	186	57.5	16.6204	23	20	202	8.23	26	0.35	0	1	1	0	0	0	1	0.428571	0	2	4	1	1	1	0	1.28571
16.6954	Chico	164	56.5	21.0068	30	13	145	8.3	27.8	0.28	0	1	1	0	0	0	1	0.428571	0	0	0	0	0	0	1	0.142857
16.6982	Chico	172	73.4	24.8107	11	24	151	4.23	24.6	-0.83	1	2	1	1	1	1	1	1.14286	1	2	1	0	1	0	0	0.714286
16.7064	Chico	181	69.8	21.3058	37	16	221	12.18	42.6	1.97	0	1	2	0	1	0	0	0.571429	0	1	0	0	0	0	0	0.142857
16.7091	Chico	170	69.5	24.0484	27	26	202	8.3	30.4	0.75	0	0	0	0	0	0	0	0	0	0	0	0	0	0	0	0
16.7118	Chico		55.9		32	6	194	9	37.5	1.24	1	1	1	1	0	0	1	0.714286	1	1	1	0	0	0	0	0.428571
16.7146	Chico	166	79.9	28.9955	26	21	184	5.5	42	1.01	4	4	4	0	0	1	4	2.42857	0	1	1	1	1	1	0	0.714286
16.7269	Chico	170	59.3	20.519	17	13	190	5	37	0.37	0	0	0	0	0	0	0	0	0	0	0	0	0	0	0	0
16.7283	Chico	175	65.7	21.4531	28	18	205	8.23	32.7	0.93	0	0	0	0	0	0	1	0.142857	0	0	0	0	0	0	0	0
16.731	Chico				27	0	210	5.3			2	4	1	1	1	2	2	1.85714	1	1	0	0	1	1	0	0.571429
16.7488	Chico	175	53.2	17.3714	19	21	162	3.5	36.2	0.19	0	0	0	0	0	0	0	0	0	0	0	0	0	0	0	0
16.7652	Chico										0	1	0	0	0	1	0	0.285714	0	0	0	0	0	0	0	0
16.7666	Chico	176	73	23.5666	21	0	180	6.3	31.9	0.28	0	1	1	0	0	0	0	0.285714	0	1	1	0	0	0	0	0.285714
16.783	Chico				25	22	170	4.3			0	1	1	0	0	0	1	0.428571	0	1	0	0	0	0	0	0.142857
16.7871	Chico				25	26	174	5			0	0	0	0	0	0	0	0	0	0	0	0	0	0	0	0
16.835	Chico	164	79.7	29.6327	9	0	72	1	19.9	-1.85	1	3	1	0	1	2	1	1.28571	1	1	0	1	0	0	0	0.428571
16.8363	Chico	185	66	19.2841	24	26	250	4	36.7	1.29	0	0	0	0	1	1	0	0.285714	0	0	0	0	0	0	0	0
16.8515	Chico				29	18	160	10			0	0	1	0	0	0	2	0.428571	0	1	1	0	0	0	0	0.285714
16.8597	Chico	180	65.2	20.1235	31	20	261	11	32.7	1.6	1	1	1	1	0	0	0	0.571429	1	1	1	0	0	0	0	0.428571
16.8692	Chico	182	92.4	27.8952	11	21		4	33.3		0	0	0	0	0	0	0	0	0	0	0	0	0	0	0	0
16.8816	Chico	173	59.7	19.9472	26	20	249	8	49.1	1.9	0	0	1	0	0	0	0	0.142857	0	1	1	0	0	0	0	0.285714
16.8856	Chico	170	49.8	17.2318	27	8	214	5.5	33.4	0.98	0	0	0	0	0	0	0	0	0	0	0	0	0	0	0	0
16.8883	Chico										0	0	0	0	0	0	0	0	0	0	0	0	0	0	0	0
16.898	Chico	180	71.4	22.037	29	22	208	10.15	33.9	1.06	1	1	1	1	0	1	1	0.857143	1	2	2	1	1	0	1	1.14286
16.8993	Chico	175	97.9	18.2588	20	18	160	3	46.4	0.65	0	0	0	0	0	0	0	0	0	0	0	0	0	0	0	0
16.9102	Chico	167	62.3	22.3386	30	23		9	31.3		1	1	4	1	0	0	4	1.57143	1	1	0	1	0	0	0	0.428571
16.9157	Chico										0	2	3	3	2	2	2	2	1	4	3	3	4	3	1	2.71429
16.9391	Chico	175	91.3	29.8122	31	30	172	9	38.4	1.02	0	0	0	0	0	1	0	0.142857	0	1	1	1	0	1	1	0.714286
16.9829	Chico				38	25	205
17.0486	Chico	179	69.7	21.7534	20	11	175	8.17	40.3	0.53	3	2	3	2	0	3	3	2.28571	4	3	0	2	0	0	0	1.28571
17.0513	Chico	177	61.4	19.5985	34	15	240	6	47.6	2.19	2	4	1	3	0	1	2	1.85714	0	1	1	0	0	1	0	0.428571
17.0541	Chico	181	74.7	22.8015	34	0	240	11.3	49.11	2.25	0	0	0	0	0	0	1	0.142857	2	4	4	2	2	4	0	2.57143
17.0678	Chico	175	80.2	26.1878	30	12	199	6.07	41.2	1.33	0	0	0	0	0	0	0	0	0	0	0	0	0	0	0	0
17.076	Chico	180	86.2	26.6049	21	10	225	4.33	30.6	0.64	0	0	0	0	0	1	1	0.285714	0	0	0	0	0	1	0	0.142857
17.0815	Chico				26	23	210	3.5			2	2	2	2	1	1	1	1.57143	1	1	1	0	0	1	1	0.714286
17.0951	Chico	179	65.8	20.5362	27	0	195	13.02	27.9	0.58	0	0	0	0	0	0	0	0	0	0	0	0	0	0	0	0
17.1006	Chico	171	61.4	20.9979	27	6			27.9		0	0	0	0	0	0	1	0.142857	1	0	1	0	0	0	0	0.285714
17.1143	Chico				20	32	185	5			0	0	1	0	0	0	1	0.285714	0	0	0	0	0	0	0	0
17.1155	Chico	177	62.4	19.9176	32	24	220	9	45.8	1.82	0	0	1	0	1	1	0	0.428571	1	0	0	1	1	0	0	0.428571
17.117	Chico	176	74.5	24.0509	30	16	191	11.45	32.8	0.91	0	0	0	0	0	0	0	0	0	0	0	0	0	0	0	0
17.1335	Chico	171	57.3	19.5958	30	5	220	8.3	35.8	1.3	0	0	1	0	0	0	0	0.142857	0	0	0	0	0	0	0	0
17.2304	Chico	174	60.3	19.9168	26	20		7.5	46.2
17.232	Chico	153	68.1	29.0914	25	11	120	3	21.5	-0.48	0	1	1	0	0	0	1	0.428571	0	1	1	0	0	0	0	0.285714
17.2402	Chico	180	84.5	26.0802	18	15	215	5	39.9	0.77	0	1	3	0	0	1	0	0.714286	0	0	1	0	1	0	0	0.285714
17.2457	Chico	169	43.8	15.3356	27	15	215		26.4	0.7	0	1	1	0	0	0	1	0.428571	1	4	1	4	0	0	1	1.57143
17.2567	Chico	167	63.3	22.6971	32	21	209	8	40.8	1.51	0	0	0	0	0	0	0	0	0	0	0	0	0	0	0	0
17.2676	Chico	174	73.1	24.1445				11	38.7		0	0	0	0	0	0	0	0	0	0	0	0	0	0	0	0
17.2715	Chico	174	68	22.46	26	35	170	6	31.8	0.46	0	0	0	0	0	0	0	0	0	0	0	0	0	0	0	0
17.2841	Chico	178	74.8	23.6081	25	20	225	7.1	32.1	0.92	0	0	0	0	0	1	0	0.142857	0	0	0	0	0	0	0	0
17.295	Chico	173	59.3	19.8136	28	22	210	8.5	39.1	1.24	4	4	4	4	2	4	4	3.71429	2	1	1	1	1	1	1	1.14286
17.3005	Chico	164	74.2	27.5877	23	5	182	5.75	33.1	0.46	1	1	3	0	0	1	3	1.28571	1	1	1	2	0	0	0	0.714286
17.3005	Chico	178	77.9	24.5865	26	12	170	6.4	36.3	0.64	1	0	1	0	0	1	0	0.428571	1	0	0	0	0	0	0	0.142857
17.3279	Chico	182	91.3	27.5631	11	28	150	2.18	30.6	-0.59	0	1	1	0	1	1	1	0.714286	0	1	1	1	0	0	0	0.428571
17.3361	Chico	177	57.2	18.2578	23	18	211	6.16	46.7	1.29	0	0	0	0	0	0	0	0	0	0	0	0	0	0	0	0
17.3552	Chico	184	62.2	18.3719				8	42.9		0	0	0	0	0	0	0	0	0	0	0	0	0	0	0	0
17.3591	Chico	180	70.9	21.8827	33	26	240	4.5	32.5	1.51
17.3607	Chico	179	67.4	21.0355	33	25	210	12.3	30	1.13	0	0	0	0	0	0	0	0	0	0	0	0	0	0	0	0
17.3963	Chico	182	100.3	30.2802	25	3	195	5.25	38.2	0.9	0	1	1	0	0	0	1	0.428571	2	2	0	2	0	0	0	0.857143
17.4018	Chico	192	79.4	21.5386	20	23	218	11.08	52.5	1.43
17.4155	Chico					15
17.4209	Chico	174	61.1	20.181	32	13	198	11.05	34.9	1.17	0	0	0	0	0	0	0	0	0	0	0	0	0	0	0	0
17.4209	Chico
17.4702	Chico	178	70.3	22.1879	32	30	221	10.15	38.2	1.52	0	1	0	0	0	0	0	0.142857	0	0	0	0	0	0	0	0
17.4713	Chico	184	72.6	21.4438	27	28	195	6.5	37.5	0.98	1	0	0	0	0	0	0	0.142857	1	1	0	1	0	0	0	0.428571
17.4949	Chico	176	73.9	23.8572	25	28	160	6	35.5	0.47
17.4986	Chico	183	57.3	17.1101	17	9	145	4.5	32.5	-0.23
17.5441	Chico	175	92	30.0408		1	140	3	31.2		0	1	0	0	0	0	0	0.142857	0	0	1	0	0	0	0	0.142857
17.578	Chico	171	57.6	19.6984	31	15	174	9.5	34.5	0.88	0	4	0	0	1	0	4	1.28571	0	1	0	0	0	0	1	0.285714
17.5852	Chico	181	84.1	25.6708	28	14	157	6.12	30.9	0.41	0	0	0	0	0	0	0	0	0	1	1	0	0	1	0	0.428571
17.6099	Chico	163	58.8	22.1311	34	3		11.05	31.3		0	0	0	0	0	0	0	0	0	0	1	0	0	1	0	0.285714
17.6126	Chico	174	70.6	23.3188	30	13	220	9.35	34	1.23	0	0	0	0	0	0	0	0	0	0	0	0	0	0	0	0
17.6263	Chico	176	73.9	23.8572	31	15	233	8.4	42.9	1.77	0	0	0	0	0	0	0	0	0	0	0	0	0	0	0	0
17.6263	Chico	179	67.1	20.9419		31	220	10.3	42.6		1	1	1	1	1	0	0	0.714286	1	1	1	1	0	0	1	0.714286
17.6838	Chico	185	87.3	25.5077	32	18	210	8.3	43.6	1.64	0	0	0	0	1	0	0	0.142857	0	0	0	0	1	0	0	0.142857
17.7057	Chico
17.7194	Chico	189	80	22.3958	35	10	235	8.3	49.5	2.28	0	0	0	0	0	0	0	0	0	0	0	0	0	0	0	0
17.7248	Chico	173	57.3	19.1453	31	14	263	11.08	37	1.8	0	0	0	0	0	0	0	0	0	0	0	0	0	0	0	0
17.7358	Chico	178	103.3	32.6032	28	15	210	5	34.9	1.06	0	0	0	1	0	0	0	0.142857	0	0	0	0	0	0	1	0.142857
17.7769	Chico	179	62.4	19.475					40.6		1	1	1	0	1	0	0	0.571429	1	1	1	1	1	1	1	1
17.7823	Chico	166	85	30.8463	26	11	158	5.4	22.2	-0.05	0	0	0	0	0	0	0	0	0	0	0	0	0	0	0	0
17.8316	Chico	173	89.4	29.8707	27	16	205	6.25	40.6	1.2	0	0	0	0	0	0	0	0	4	0	0	1	0	0	0	0.714286
17.8508	Chico	168	61.4	21.7545	36	11	245	14	40	2.03	0	0	0	0	0	0	0	0	0	0	0	0	0	0	0	0
17.8919	Chico	186	61	17.6321	26	30	220	9	31	0.88
17.9411	Chico	166	73.8	26.7818	29	1	201		42.6	1.35	0	4	3	0	0	0	0	1	0	0	0	0	0	0	0	0
17.9685	Chico	183	67.8	20.2455	28	22	250		37.8	1.55	0	0	0	0	0	0	0	0	0	0	0	0	0	0	0	0
17.9713	Chico	177	71.4	22.7904	28	12	215	9	44.5	1.51	0	0	0	0	0	0	1	0.142857	0	1	0	0	0	0	0	0.142857
	Chica					23	140	1
	Chica					21	170
12.9911	Chica	159	52.2	20.6479	19	0	126	1.5	17.9	-0.9	0	3	4	2	3	4	4	2.85714	0	4	4	1	0	1	1	1.57143
12.9911	Chica	155	50.3	20.9365	21	2	120	2	20.9	-0.72	0	0	0	0	2	0	0	0.285714	4	4	4	4	4	4	4	4
13.9929	Chica	155	54.5	22.6847	17	35	205	6	29	0.18	0	0	0	0	0	0	0	0	0	0	0	0	0	0	0	0
13.9929	Chica										0	1	1	0	0	4	1	1	0	1	1	0	1	0	1	0.571429
14.9979	Chica	152	37.6	16.2742				3.05	13.5		0	1	1	0	0	1	1	0.571429	0	1	0	0	0	0	0	0.142857
15.9934	Chica	166	79	28.6689	20	24	115	3	28.7	-0.5	0	0	0	0	0	0	0	0	0	0	0	0	0	0	0	0
16.9938	Chica	163	53	19.9481					22.4		1	4	1	1	0	0	1	1.14286	0	1	0	0	0	0	0	0.142857
18.0077	Chica	153	43.5	18.5826	18	28	140	4.5			1	2	2	2	1	2	1	1.57143	0	2	1	1	1	1	1	1
18.193	Chica	163	81.7	30.7501	20	20	191	2.2	21	-0.12	0	2	4	1	1	4	4	2.28571	0	1	1	0	0	0	4	0.857143
18.1985	Chica	163	62	23.3355	30	17	150	6			0	0	0	0	0	0	0	0	0	0	0	0	0	0	0	0
18.2067	Chica	174	59.1	19.5204	23	0	170	5			0	0	0	0	1	0	0	0.142857	0	0	0	0	0	0	0	0
18.5051	Chica				21	27	130	5			1	2	1	0	1	0	1	0.857143	0	0	0	0	0	0	0	0
18.6612	Chica	170	76.3	26.4014				8.2			0	1	0	0	0	0	1	0.285714	0	0	0	0	0	0	1	0.142857
18.6776	Chica	163	46.5	17.5016							0	0	1	0	1	0	1	0.428571	0	0	1	0	0	1	0	0.285714
18.7625	Chica	166	57.2	20.7577	21	15	100	4
18.7762	Chica	170	60.7	21.0035	23	10	120	4.3			0	0	4	0	0	0	2	0.857143	0	1	4	0	0	4	4	1.85714
18.8638	Chica	165	51	18.7328				3	20.6		0	0	1	1	0	0	1	0.428571	0	1	1	0	0	0	0	0.285714
18.8665	Chica	168	54.7	19.3807	19	33	170				1	0	3	0	0	0	0	0.571429	0	1	1	0	0	0	0	0.285714
19.2909	Chica	162	49	18.6709	15	31	125	3.42			0	0	0	0	0	0	0	0	0	0	0	0	0	0	0	0
19.3347	Chica	152	61.8	26.7486	18	19	230	3.3	26.1	0.34	0	0	0	0	0	1	0	0.142857	0	1	0	0	0	0	0	0.142857
19.7782	Chica
19.8084	Chica	158	56.5	22.6326							0	1	1	0	0	1	1	0.571429	0	0	0	0	0	0	0	0
20.0493	Chica	170	67	23.1834	20	19	120
12.0548	Chica	159	71.4	28.2426		25	146	2.14	25.8		0	4	4	4	0	4	4	2.85714	0	0	0	0	0	0	0	0
12.0794	Chica	146	36	16.8887	20	23	133	4.05	16	-0.86	0	0	0	0	0	0	0	0	0	0	0	0	0	0	0	0
12.1068	Chica	152	44.6	19.304	28	21	120	6	16.8	-0.51	0	0	0	0	0	0	0	0	0	0	0	0	0	0	0	0
12.1424	Chica	155	41.7	17.3569	20	25	144	3.34	15.1	-0.8	0	0	1	0	1	0	0	0.285714	0	0	0	0	0	0	0	0
12.1533	Chica	156	48.4	19.8882	25	16	132	3.55	17.9	-0.52	0	0	0	0	0	0	0	0	0	0	0	0	0	0	0	0
12.1615	Chica	146	33	15.4813	20	9	131	2	12.5	-1.02	0	1	3	0	0	0	1	0.714286	0	0	0	0	0	0	1	0.142857
12.1889	Chica	160	45.6	17.8125	15	15	163	6.19	18.7	-0.74	0	0	0	0	0	0	0	0	0	0	0	0	0	0	0	0
12.1971	Chica	164	67.4	25.0595	15	11	144	2.55	23.7	-0.71	0	0	0	0	0	0	0	0	0	0	0	0	0	0	0	0
12.1999	Chica	148	39.6	18.0789	19	3	185	4.48	17.9	-0.36	0	0	0	0	0	0	0	0	0	0	0	0	0	0	0	0
12.2026	Chica	144	37.8	18.2292	20	22	159	5.1	14.9	-0.67	0	0	0	0	0	0	0	0	0	0	0	0	0	0	0	0
12.2053	Chica	154	53.2	22.4321	18	20	136	2.45	16.9	-0.9	0	0	0	0	0	0	0	0	0	0	0	0	0	0	0	0
12.2167	Chica	141	46.2	23.2383	17	22	140	2	16.6	-0.93	0	4	1	0	0	0	0	0.714286	0	1	1	0	0	0	0	0.285714
12.2218	Chica	159	43.7	17.2857	15	25	139	2.26	21.3	-0.86	0	0	0	0	0	0	0	0	0	0	0	0	0	0	0	0
12.225	Chica	173	69.2	23.1214	18	26	160	2.5	29.3	-0.17	0	0	0	0	0	0	0	0	0	0	0	0	0	0	0	0
12.2332	Chica	153	43.2	18.4544	25	2	130	3.5	17.1	-0.57	0	0	0	0	1	0	0	0.142857	0	0	0	0	0	0	0	0
12.2355	Chica	153	56.4	24.0933	20	10	115	4.25	22.1	-0.77	0	0	0	0	0	0	0	0	0	0	0	0	0	0	0	0
12.2469	Chica	154	40.7	17.1614	21	10	130	3	17.2	-0.78	0	3	3	0	0	1	4	1.57143	0	1	0	0	0	0	0	0.142857
12.2523	Chica	163	54.5	20.5126	20	7	132	2	18.5	-0.77	0	1	0	0	0	2	0	0.428571	0	0	0	0	0	0	0	0
12.2628	Chica	160	41.9	16.3672	20	10	175	3.25	14.3	-0.55	0	0	0	0	0	0	0	0	0	0	0	0	0	0	0	0
12.271	Chica	158	55.6	22.2721	20	19	121	2.25	18.5	-0.87	1	4	1	1	0	4	1	1.71429	0	0	0	0	0	0	0	0
12.2738	Chica	145	37	17.5981	18	7	148	6.35	18.8	-0.72	0	0	0	0	0	0	0	0	0	0	0	0	0	0	0	0
12.2875	Chica	146	43.1	20.2196	23	20	149	7.25	16.1	-0.55	0	0	0	0	0	0	0	0	0	0	0	0	0	0	0	0
12.2879	Chica	151	43.7	19.1658	17	21	150	5	17.8	-0.79	0	0	0	0	0	0	0	0	0	0	0	0	0	0	0	0
12.2989	Chica	153	39.8	17.002	20	7	150	4	18.5	-0.6	0	0	0	0	0	0	0	0	0	0	0	0	0	0	0	0
12.3039	Chica	153	53.5	22.8545	14	11	116	2.3	17.5	-1.28	0	0	0	0	0	0	0	0	0	0	0	0	0	0	0	0
12.3043	Chica	155	47.6	19.8127	26	15	170	4.5	18.4	-0.1	0	0	0	0	1	0	2	0.428571	0	0	1	0	0	0	1	0.285714
12.3098	Chica	158	71.7	28.7214	19	27	130	2	26.1	-0.52	1	1	1	0	0	0	1	0.571429	0	1	0	0	0	0	0	0.142857
12.3235	Chica	158	46.9	18.7871	27	10	144	4	21	-0.17	0	0	0	0	0	0	0	0	0	1	0	0	0	0	0	0.142857
12.3258	Chica	156	60.7	24.9425	10	3	139	2.51	18.2	-1.26	0	4	0	3	0	0	0	1	0	0	0	0	0	0	0	0
12.3368	Chica	146	58.1	27.2565	12	12	106	2	15.4	-1.57	0	1	1	0	0	1	1	0.571429	0	0	0	0	0	0	0	0
12.3395	Chica	155	63.3	26.3476		18	86		22.7		0	0	0	0	0	0	0	0	0	0	0	0	0	0	0	0
12.3422	Chica	152	42.8	18.5249	27	27	181	4.5	20.1	0.13	1	1	0	0	0	0	1	0.428571	1	1	0	0	0	0	0	0.285714
12.345	Chica	165	68.1	25.0138	26	8	104	2	20.7	-0.61	1	2	2	1	0	3	2	1.57143	0	0	0	0	0	0	0	0
12.3563	Chica	153	70.3	30.0312	20	18	134	2	27.8	-0.36	0	0	0	0	0	0	0	0	0	0	0	0	0	0	0	0
12.3669	Chica				11	17	126				0	0	0	0	0	0	0	0	0	0	0	0	0	0	0	0
12.3696	Chica	167	53.7	19.2549	11	16	130	2.58	26.9	-0.92	0	0	0	0	0	0	0	0	0	0	0	0	0	0	0	0
12.3778	Chica	150	55.8	24.8	18	16	136	2	20.3	-0.76	0	0	0	0	0	0	0	0	0	0	0	0	0	0	0	0
12.381	Chica	157	36.8	14.9296	18	2	175	4	17.4	-0.53	1	1	0	1	0	4	4	1.57143	0	1	0	0	0	0	0	0.142857
12.3915	Chica	156	43.1	17.7104	20	20		3.27	17.6		0	1	0	0	0	0	0	0.142857	0	0	0	0	0	0	0	0
12.4028	Chica	163	74.1	27.8896	15	25	135	1.5	25.5	-0.72	0	1	1	0	0	0	1	0.428571	1	0	0	0	0	0	0	0.142857
12.4052	Chica	156	61.2	25.1479	19	11	94	1	17.1	-1.23	4	4	4	4	4	4	4	4	1	1	1	1	0	0	0	0.571429
12.4216	Chica	150	57.8	25.6889	21	25	132	3.15	23.9	-0.49	0	0	0	0	0	0	0	0	0	0	0	0	0	0	0	0
12.4244	Chica				12	8	145	2.55			0	0	0	0	0	0	0	0	0	0	0	0	0	0	0	0
12.4877	Chica	158	52.9	21.1905	17	27	120	4	21	-0.94	0	0	0	0	0	1	0	0.142857	0	0	0	0	0	0	0	0
12.512	Chica	157	47.8	19.3923	16	0	140	4.34	21.7	-0.78	0	0	0	0	0	0	0	0	0	0	0	0	0	0	0	0
12.5123	Chica	153	42.9	18.3263	30	5	150	4	18.1	-0.07	0	0	0	0	0	0	0	0	0	0	0	0	0	0	0	0
12.5233	Chica	155	36.1	15.026	16	9	148	3.5	16.5	-0.92	0	0	0	0	0	0	0	0	0	0	0	0	0	0	0	0
12.5257	Chica				16	20	139	1.58			0	1	0	0	1	0	0	0.285714	0	0	0	0	0	0	0	0
12.5421	Chica	164	45.9	17.0657	10	7	120	1.2	15.9	-1.53	2	3	1	1	0	4	3	2	0	0	0	0	0	0	0	0
12.5503	Chica	150	37.9	16.8444	24	14	155	5.5	18.5	-0.34	0	0	0	0	0	0	0	0	0	0	0	0	0	0	0	0
12.553	Chica	150	53.7	23.8667	9	5	120	2.35	16	-1.58	0	0	0	0	0	0	0	0	0	0	0	0	0	0	0	0
12.5695	Chica	151	32.4	14.2099	16	6		3.57	16		1	1	1	1	1	1	1	1	0	1	1	0	0	0	1	0.428571
12.5695	Chica										1	1	1	1	1	1	1	1	0	1	1	0	0	0	1	0.428571
12.5749	Chica	156	54.2	22.2715	17	36	161	3.2	25.1	-0.39	0	0	0	0	0	0	0	0	0	0	0	0	0	0	0	0
12.5777	Chica	152	51.8	22.4204	16	25	125	3.13	19.1	-1.02	0	0	0	0	0	0	0	0	0	0	0	0	0	0	0	0
12.5859	Chica	153	42	17.9418	29	31	170	5.18	28.2	0.47	0	0	0	0	0	0	0	0	0	0	0	0	0	0	0	0
12.6023	Chica	163	53.4	20.0986	20	21	150	3.75	32.1	-0.04	0	0	0	0	0	0	0	0	1	0	0	0	0	0	0	0.142857
12.6105	Chica	151	48.4	21.2271	17	7	126	2.4	18	-1
12.6163	Chica	154	46.8	19.7335	21	20	130	3.5	20.3	-0.66	0	0	0	0	0	0	0	0	0	0	0	0	0	0	0	0
12.63	Chica	152	38.8	16.7936	21	29	140	3.5	16.9	-0.7	0	0	0	0	0	0	0	0	0	0	0	0	0	0	0	0
12.6379	Chica	161	52.4	20.2153	12	8	125	2.26	18.5	-1.26	0	0	0	0	0	0	0	0	0	0	0	0	0	0	0	0
12.6489	Chica	156	48.4	19.8882	30	24	115	3.5	21	-0.28	1	1	1	0	0	1	1	0.714286	0	1	1	0	0	0	0	0.285714
12.6574	Chica	148	39.6	18.0789	21	25	160	7	15.4	-0.58	0	1	1	0	0	1	0	0.428571	0	0	0	0	0	0	0	0
12.6601	Chica	157	41	16.6335	18	29	170	5.5	18.5	-0.53	1	4	0	1	2	1	4	1.85714	0	3	1	0	0	0	0	0.571429
12.6626	Chica	157	44.3	17.9723	18	22	153	1.58	18.8	-0.67	1	0	0	0	0	0	0	0.142857	0	0	0	0	0	0	0	0
12.6762	Chica	154	50.9	21.4623	15	24	150	6.23	21	-0.77	0	1	0	0	0	0	0	0.142857	0	0	0	0	0	0	0	0
12.6793	Chica	160	45.8	17.8906	17	19	140	4.5	21.8	-0.72	0	1	2	0	0	2	2	1	0	0	0	0	0	1	0	0.142857
12.682	Chica	162	43	16.3847	17	21		3.5	16.9		0	1	1	0	1	0	0	0.428571	0	0	0	0	0	0	0	0
12.6847	Chica	152	41.8	18.0921	18	14	150	5	26.9	-0.36	0	0	0	0	0	0	0	0	0	0	0	0	0	0	0	0
12.6899	Chica	170	79.3	27.4394	14	11	122	3.13	25.8	-0.88	0	0	0	0	0	0	0	0	0	0	0	0	0	0	0	0
12.6929	Chica	157	46.1	18.7026	25	30	140	4	21.6	-0.29	3	2	0	1	2	1	0	1.28571	1	1	0	0	0	0	0	0.285714
12.6954	Chica	167	52.9	18.9681	17	11	185	5.24	25.2	-0.17	0	0	0	0	0	0	0	0	0	0	1	0	0	0	0	0.142857
12.7118	Chica	158	44.8	17.9458	17	11	154	3.04	17.6	-0.76	1	1	2	1	0	1	1	1	1	1	1	0	0	0	0	0.428571
12.7255	Chica	149	42.8	19.2784	18	27	167	8.11	21.8	-0.42	0	0	0	0	0	0	0	0	0	0	0	0	0	0	0	0
12.7313	Chica	155	68	28.3039	22	24	130	1	20.3	-0.6	0	2	2	1	1	1	2	1.28571	0	1	0	1	0	1	0	0.428571
12.7313	Chica	169	52.9	18.5218	20	26	150	5.5	21.3	-0.48	0	0	0	0	1	0	0	0.142857	0	0	0	0	0	0	0	0
12.7392	Chica	150	76.7	34.0889	15	31	128	1.12	30.7	-0.57	0	1	1	0	0	0	0	0.285714	0	1	0	0	0	0	0	0.142857
12.7449	Chica	164	46.3	17.2145	25	21	120	2	23	-0.42	0	0	1	0	0	0	0	0.142857	0	0	0	0	0	0	0	0
12.7584	Chica	168	61.6	21.8254	23	23	165	2.5	23.6	-0.09	1	1	1	1	1	1	0	0.857143	0	0	0	0	0	0	0	0
12.7693	Chica	153	52.4	22.3846	18	18	171	4.09	20.3	-0.44	0	0	0	0	0	0	0	0	0	0	0	0	0	0	0	0
12.7778	Chica	150	32.9	14.6222	27	14	140	3.5	15.1	-0.45	0	0	0	0	0	0	0	0	0	0	0	0	0	0	0	0
12.7803	Chica	172	101.5	34.3091	14	16	138	1.5	32.5	-0.46	0	0	1	0	0	1	1	0.428571	0	0	0	0	0	0	0	0
12.7858	Chica	156	56.2	23.0934	22	3	137	2.4	24.8	-0.35	0	0	0	0	0	0	0	0	0	0	0	0	0	0	0	0
12.7885	Chica	149	51.8	23.3323	21	9	139	3.25	18.1	-0.66	0	1	0	0	1	1	0	0.428571	0	0	0	0	0	0	0	0
12.7967	Chica	152	55.7	24.1084	30	29	129	4.5	23.4	-0.05	4	3	1	1	0	1	1	1.57143	1	0	0	0	0	0	1	0.285714
12.8131	Chica	158	58.2	23.3136	18	6	175	3.57	28.8	-0.05	0	0	0	0	0	0	0	0	0	0	0	0	0	0	0	0
12.8268	Chica	165	52.6	19.3205	12	6	147	3.57	16	-1.17	0	0	1	0	0	1	1	0.428571	0	0	0	0	0	0	0	0
12.8296	Chica	158	49.7	19.9087	22	20	156	3.17	18.9	-0.42	0	0	0	0	0	0	0	0	0	0	0	0	0	0	0	0
12.835	Chica	160	78.7	30.7422	12	6	123	3	20.3	-1.21	0	0	0	0	0	0	0	0	0	0	0	0	0	0	0	0
12.838	Chica	150	46.1	20.4889	16	11	120	2.5	19.3	-1.06	1	1	2	0	1	1	0	0.857143	0	1	1	0	0	0	1	0.428571
12.8405	Chica	162	61.5	23.4339	15	24	123	3.2	22.8	-0.94	0	0	0	0	0	0	0	0	0	0	0	0	0	0	0	0
12.8407	Chica	168	48.7	17.2548	21	2	140	3	26.1	-0.32	0	0	0	0	0	0	0	0	0	0	0	0	0	0	0	0
12.8597	Chica	148	52.2	23.8313	20	23	150	4.24	19.1	-0.58	0	0	0	0	0	0	0	0	0	0	0	0	0	0	0	0
12.8624	Chica	159	48.2	19.0657	12	6	133	2.2	14.9	-1.34	0	0	0	0	0	0	0	0	0	0	0	0	0	0	0	0
12.8624	Chica	160	76.6	29.9219	17	16	127	3.1	24.3	-0.73	0	0	2	0	0	0	1	0.428571	0	1	1	0	0	0	1	0.428571
12.8652	Chica	158	42.2	16.9043	21	17	161	4.5	20.1	-0.38	0	0	0	0	0	0	1	0.142857	0	0	0	0	0	0	1	0.142857
12.8679	Chica	148	35.5	16.2071	16	7	139	2	12.9	-1.15	0	1	1	0	0	0	1	0.428571	0	0	0	0	1	0	0	0.142857
12.8679	Chica	155	64.1	26.6805	23	25	136	3	23.4	-0.36	4	4	4	4	0	0	4	2.85714	0	0	4	0	0	0	4	1.14286
12.8681	Chica	151	54.4	23.8586	23	26	180	5	26.1	0.15	0	0	0	0	0	0	0	0	0	0	0	0	0	0	0	0
12.8763	Chica	151	42.2	18.508	20	16	140	3.5	23.4	-0.49	0	0	0	0	0	0	0	0	0	0	0	0	0	0	0	0
12.8789	Chica					25	102	1.58			0	3	3	0	0	3	0	1.28571	0	1	1	0	1	0	1	0.571429
12.8953	Chica	154	59.4	25.0464	14	19	100	1.53	17.2	-1.44	0	0	0	0	0	0	0	0	0	2	2	0	0	0	0	0.571429
12.8953	Chica	152	41.2	17.8324	16	8	146	3.13	24.2	-0.62	0	0	0	0	0	0	1	0.142857	0	0	0	0	0	0	0	0
12.9008	Chica	156	56.4	23.1755	17	18	141	2.2	20.3	-0.77	0	0	0	1	0	0	1	0.285714	0	0	0	0	0	0	0	0
12.909	Chica	157	60.2	24.4229	18	8	110	2.14	17.4	-1.12	0	1	0	0	0	0	1	0.285714	0	1	1	0	0	0	1	0.428571
12.9227	Chica	156	65.2	26.7916	8	8	125	4.25	23.3	-1.28	0	1	0	0	0	1	1	0.428571	0	1	0	0	0	0	1	0.285714
12.9227	Chica	159	42.8	16.9297	14	28	168	5.14	18.1	-0.78	0	0	1	0	0	0	0	0.142857	0	0	0	0	0	0	0	0
12.9254	Chica	170	64.5	22.3183	15	12	144	3.27	24.3	-0.69	0	0	0	0	0	0	0	0	0	0	0	0	0	0	0	0
12.9281	Chica	170	53.2	18.4083	17	20	168	4.4	26.9	-0.25	0	1	0	0	0	0	0	0.142857	0	1	1	0	0	0	0	0.285714
12.9338	Chica	159	40.6	16.0595	19	19	131	3.5	15.7	-0.95	0	1	0	1	0	1	0	0.428571	0	0	0	0	0	0	0	0
12.9447	Chica	165	52.8	19.3939	18	35	175	6.5	20.4	-0.4	0	1	1	0	0	0	1	0.428571	0	1	0	0	0	0	0	0.142857
12.95	Chica	158	62.6	25.0761	15	17	125		22.1	-0.95	3	4	3	3	0	3	3	2.71429	0	0	0	0	0	0	0	0
12.9529	Chica	154	68.5	28.8835	15	24		1	22.4		0	0	0	0	0	0	0	0	0	0	0	0	0	0	0	0
12.9555	Chica	156	40.6	16.6831	6	16	135	2.5	20.7	-1.41	0	0	1	1	0	1	0	0.428571	0	0	0	0	0	0	0	0
12.9582	Chica	158	51.7	20.7098	25	32	177	6.21	27	0.27	0	1	1	0	0	1	1	0.571429	0	1	1	0	0	0	1	0.428571
12.9611	Chica	165	40.9	15.023	20	25	130	4.5	20.3	-0.71	1	4	4	3	0	0	4	2.28571	2	2	0	0	0	0	0	0.571429
12.9637	Chica	147	55.4	25.6375	18	28	140	3.5	18.8	-0.79	0	0	0	0	1	0	0	0.142857	0	0	0	0	0	0	0	0
12.9776	Chica	169	51.2	17.9265	19	17	170	4	25.2	-0.19	0	0	0	0	0	0	0	0	0	0	0	0	0	0	0	0
12.9776	Chica	176	70.7	22.8241	18	29	130	4	38.2	-0.08	0	0	0	0	1	0	0	0.142857	0	0	0	0	0	0	0	0
12.9829	Chica	153	57.4	24.5205	17	18	125	2.25	21.5	-0.87	0	0	1	0	1	0	1	0.428571	0	1	0	0	0	0	1	0.285714
12.9856	Chica	162	42.7	16.2704	14	9	151	3.27	19.6	-0.87	1	2	1	0	2	4	3	1.85714	0	0	0	0	1	0	0	0.142857
13.0048	Chica	161	60.3	23.263	9	15		1.2	20.6		0	1	0	0	0	0	0	0.142857	0	0	0	0	0	0	0	0
13.0075	Chica	151	38.6	16.9291	20	36	119	5	21.6	-0.76	0	0	1	0	0	0	0	0.142857	0	0	0	0	0	0	0	0
13.0157	Chica	166	52	18.8707	20	15	135	5	22.2	-0.59	0	0	0	0	1	0	0	0.142857	0	0	0	0	0	0	0	0
13.0212	Chica	153	45.5	19.437		22		1.11	23		1	4	0	0	0	4	1	1.42857	0	1	1	0	0	0	1	0.428571
13.024	Chica	166	50	18.1449	21	18	160	4	16	-0.56	0	1	0	0	0	0	1	0.285714	0	0	0	0	0	0	0	0
13.0294	Chica	164	54.6	20.3004	20	15	132		21	-0.66	0	0	0	0	0	0	0	0	0	0	0	0	0	0	0	0
13.0322	Chica	154	51.5	21.7153	23	3	124	4.25	15.7	-0.79	0	0	0	0	0	0	0	0	0	0	0	0	0	0	0	0
13.0404	Chica	169	41	14.3552	20	15	130	3.5	15.2	-0.92	0	1	1	1	0	0	0	0.428571	1	1	1	0	0	1	1	0.714286
13.0486	Chica	154	54.5	22.9803	20	15	127	2	18	-0.83	1	4	3	1	0	1	1	1.57143	0	0	0	0	0	4	0	0.571429
13.0623	Chica	166	61.8	22.4271	18	0	118	2.15	20.7	-0.91	0	0	0	0	0	0	0	0	0	0	0	0	0	0	0	0
13.0843	Chica	163	46.8	17.6145			150	5.5	16.6		0	0	0	0	0	0	0	0	0	0	0	0	0	0	0	0
13.087	Chica	160	63.2	24.6875	20	30	150	3.5	20.9	-0.5	0	0	0	0	0	0	0	0	0	0	0	0	0	0	0	0
13.0979	Chica	170	91.5	31.6609	20	20	115	3	25.8	-0.62	0	1	1	0	0	0	0	0.285714	0	0	0	0	0	0	0	0
13.098	Chica	162	53.7	20.4618	17	28	150	4	24.9	-0.5	0	0	0	0	0	0	0	0	0	0	0	0	0	0	0	0
13.1061	Chica	161	48	18.5178	15	29	160		17.1	-0.84
13.1116	Chica	152	50.3	21.7711	23	6	114	5.25	18.2	-0.78	0	1	1	0	1	0	0	0.428571	0	0	0	0	0	0	0	0
13.1198	Chica	169	54	18.9069	21	17	165	2	25.8	-0.11	1	1	1	0	0	0	1	0.571429	0	0	0	0	0	0	0	0
13.1199	Chica	150	40.8	18.1333	17	23	170	5	21.6	-0.45	0	0	0	0	0	0	0	0	0	0	0	0	0	0	0	0
13.1226	Chica	167	56	20.0796	22	18	160	4	22.5	-0.23	0	0	0	0	0	0	0	0	0	0	0	0	0	0	0	0
13.1253	Chica	147	67.9	31.4221	20	15	81	2.5	19.7	-1.18	0	1	0	0	1	0	0	0.285714	0	0	0	0	0	0	0	0
13.1281	Chica	159	48.6	19.2239			150	4	24.5		1	1	2	0	1	2	0	1	1	1	0	0	1	0	0	0.428571
13.1389	Chica	162	45	17.1468	18	18	117	6	21.7	-0.88	0	0	0	0	0	0	0	0	0	0	0	0	0	0	0	0
13.1444	Chica	142	42	20.8292	23	22	148	3	16.1	-0.56	0	0	0	0	0	0	0	0	0	0	0	0	0	0	0	0
13.1554	Chica	161	46.9	18.0934	28	21	180	6	14.1	-0.07	0	1	0	0	0	0	0	0.142857	0	0	0	0	0	0	0	0
13.1608	Chica	148	42.4	19.3572	18	15	100	2.5	13	-1.4	0	0	1	0	0	1	0	0.285714	0	0	0	0	0	0	0	0
13.1608	Chica	169	52	18.2066	19	19	115	3.5	18	-1	0	0	0	0	0	0	0	0	0	0	0	0	0	0	0	0
13.1608	Chica	162	57.4	21.8717	24	9	142	6.25	21.9	-0.32	0	0	1	0	0	0	1	0.285714	0	0	0	0	0	0	0	0
13.1691	Chica	166	53	19.2336	23	32	162	3	26	-0.02
13.1691	Chica	165	65	23.8751	19	18		4	34.2		0	1	0	0	0	0	1	0.285714	1	0	0	0	0	0	0	0.142857
13.1718	Chica	147	64.8	29.9875	22	26	100	3	17.5	-0.99	0	0	0	0	0	0	0	0	0	0	0	0	0	0	0	0
13.1773	Chica	165	60.2	22.112	20	20	160	4	25.5	-0.22	0	0	0	0	0	0	1	0.142857	0	0	0	0	1	0	0	0.142857
13.1883	Chica	159	50.7	20.0546	23	18	140	1	23	-0.34	0	0	1	0	0	1	1	0.428571	0	0	1	0	0	0	0	0.142857
13.1883	Chica	158	43.5	17.4251	27	29	160	5.5	21.9	0.01	0	0	1	0	0	0	1	0.285714	0	0	0	0	0	0	0	0
13.191	Chica	142	28.9	14.3325	16	6	122	2.23	11.3	-1.37	0	0	1	0	0	0	1	0.285714	0	0	0	0	0	0	0	0
13.191	Chica	154	47.2	19.9022	23	31	145	4.5	20	-0.42	0	0	0	0	0	0	0	0	0	0	0	0	0	0	0	0
13.1965	Chica	159	54.1	21.3995	27	30	190	6	25.5	0.44	1	1	1	0	0	1	0	0.571429	0	1	0	0	0	0	0	0.142857
13.1965	Chica	152	35.2	15.2355	26	18	200	7.5	17.9	0.16	0	0	1	0	0	0	1	0.285714	0	0	0	0	0	0	1	0.142857
13.202	Chica	164	65.4	24.3159	22	33	190	5.5	27	0.23	0	0	0	0	0	0	0	0	0	0	0	0	0	0	0	0
13.2047	Chica	161	57.7	22.2599	22	29	170	5	26.6	0.03	1	0	0	0	0	0	0	0.142857	0	0	0	0	0	0	0	0
13.2047	Chica	162	39.3	14.9749	32	11	170	6	20.1	0.3	1	1	1	0	0	0	0	0.428571	1	0	1	0	0	1	0	0.428571
13.2074	Chica	152	45.2	19.5637	20	28	190	5.5	20.3	-0.16	0	1	1	1	0	1	1	0.714286	0	1	1	0	0	0	0	0.285714
13.2211	Chica	154	58.8	24.7934	27	24	105	3	20.9	-0.53	0	0	0	0	0	0	0	0	1	3	1	0	1	0	0	0.857143
13.2238	Chica							2	28.9		0	0	0	0	0	0	0	0	0	0	0	0	0	0	0	0
13.243	Chica	162	49	18.6709	24	31	167		18	-0.25
13.2621	Chica	162	58.7	22.367	22	13	95	2	14.6	-1.16
13.2676	Chica	168	50	17.7154	16	15	142	2	24.6	-0.64
13.2813	Chica	152	48	20.7756	20	27	140		17	-0.75
13.2841	Chica	164	62.5	23.2377	21	24	125	2.27	19.9	-0.72	0	0	0	0	0	0	0	0	0	0	0	0	0	0	0	0
13.3169	Chica	160	60.6	23.6719	24	16	115	4	27	-0.35	0	0	0	0	0	0	0	0	1	0	0	0	0	0	1	0.285714
13.3279	Chica	143	49.6	24.2555	7	4	80	2	12.6	-2.19	1	1	0	0	0	0	1	0.428571	1	1	1	0	0	1	1	0.714286
13.3279	Chica	161	63	24.3046	24	21	130	3	19.7	-0.52	0	1	1	0	0	0	1	0.428571	0	0	1	0	0	0	0	0.142857
13.3415	Chica	158	58	23.2335	14	15	120	1.5	16	-1.3	0	1	1	0	0	0	3	0.714286	0	1	0	0	0	0	0	0.142857
13.3415	Chica	159	56	22.151	7	23	130	2	15.3	-1.62	0	2	2	0	0	3	2	1.28571	0	1	2	0	0	0	0	0.428571
13.3552	Chica	153	40	17.0874	21	15	135	2.5	20	-0.62
13.358	Chica	155	48.1	20.0208	29	21	150	7	25.2	0.16	0	1	0	1	1	0	0	0.428571	0	1	0	0	0	0	0	0.142857
13.3744	Chica	157	65.3	26.4919		21		3	23.7
13.3771	Chica	148	47	21.4573	15	15	115	2	11	-1.5	0	0	0	0	0	0	0	0	0	0	0	0	0	0	0	0
13.3771	Chica	149	55.8	25.134	27	28	105	3.5	24.6	-0.38	0	0	0	0	0	0	0	0	1	3	0	0	0	0	0	0.571429
13.3908	Chica	149	77.2	34.7732	16	24	68	2.25	19.3	-1.54	0	0	1	0	0	0	0	0.142857	0	0	0	0	0	0	0	0
13.4209	Chica	160	67.2	26.25	19	28	155	4.5	21.2	-0.5
13.4264	Chica	160	71.8	28.0469	15	23	99	2.25	28.2	-0.94	0	0	0	0	0	0	0	0	0	0	1	0	0	0	0	0.142857
13.4292	Chica	160	62	24.2188	20	20	137	5	18.7	-0.71
13.4511	Chica	165	50	18.3655	27	15	130	3.5	28	-0.01	0	0	0	0	0	0	0	0	0	0	4	0	1	1	0	0.857143
13.4593	Chica	161	52	20.061	27	15	156	3.5	23.3	0.03	1	2	2	0	0	0	2	1	1	1	0	0	1	0	1	0.571429
13.4702	Chica				24	15	130	3.5	13.8	-0.76	1	1	1	0	0	1	1	0.714286	1	2	3	0	0	2	0	1.14286
13.4894	Chica	153	48	20.5049	20	15	106	2	17	-1.07	0	0	0	0	0	0	0	0	0	1	1	0	0	0	0	0.285714
13.4894	Chica	153	66	28.1943	20	20	145	4	22	-0.5	0	0	0	0	0	0	0	0	0	0	0	0	0	0	0	0
13.4894	Chica	156	39.6	16.2722	25	19	189	5.5	16	-0.08	0	0	0	0	0	0	0	0	0	0	0	0	0	0	0	0
13.5085	Chica	159	50.3	19.8964	16	17	135	2.5	22.7	-0.78
13.5305	Chica	163	82.7	31.1265	19	21	140	2	22	-0.6	0	0	0	0	0	0	0	0	0	0	0	0	0	0	0	0
13.5359	Chica	150	48.5	21.5556	19	24	101	3.25	15.1	-1.25	0	0	0	0	0	0	0	0	0	0	0	0	0	0	0	0
13.5441	Chica	160	52.3	20.4297	22	15	130	2	14.6	-0.84	0	1	0	0	0	0	0	0.142857	0	0	0	0	0	0	0	0
13.5496	Chica	161	52.6	20.2924	8	20		2.14	22.5		1	1	1	0	0	0	1	0.571429	1	1	1	0	0	0	1	0.571429
13.5496	Chica	152	41.6	18.0055	10	21	139	3.2	15.3	-1.38	0	0	1	0	0	0	0	0.142857	0	0	0	0	0	0	0	0
13.5524	Chica	157	53.2	21.583	14	25	110	3.75	15.5	-1.42	0	0	0	0	1	1	0	0.285714	0	0	0	0	0	0	0	0
13.5715	Chica	163	58	21.83	22	16	154	3	17.4	-0.5
13.5743	Chica	152	47	20.3428	28	15	158	4	18	-0.11
13.5852	Chica	160	51	19.9219	14	15	134	2.5	15.7	-1.19	0	1	0	0	1	0	0	0.285714	0	0	0	0	0	0	0	0
13.5852	Chica	156	41	16.8475	23	18	169	5.5	17.6	-0.3	0	0	0	0	0	0	0	0	0	0	1	0	0	0	0	0.142857
13.588	Chica
13.6235	Chica	164	57.2	21.2671	22	9	148	4.5	24.6	-0.26	0	0	0	0	0	0	0	0	0	0	0	0	0	0	0	0
13.6454	Chica	159	59.4	23.4959	13	20	104	1.5	17.8	-1.43	0	0	0	0	0	0	0	0	0	0	1	0	0	0	0	0.142857
13.6454	Chica	165	52.5	19.2837	16	0	183	4.5	21.3	-0.4	0	0	0	0	0	0	0	0	0	0	0	0	0	0	0	0
13.6509	Chica	154	43.9	18.5107	22	15	130	5	19.3	-0.64	0	0	0	0	0	0	0	0	1	4	4	1	0	1	4	2.14286
13.6619	Chica	166	40.8	14.8062	18	15	147	6	21.8	-0.6
13.6783	Chica	163			24	15	120	4	20	-0.6	0	0	0	0	0	0	0	0	1	1	1	0	0	1	1	0.714286
13.6783	Chica	160	48.7	19.0234	24	15	147	6	21	-0.31
13.6975	Chica	155	52.3	21.769	17	27	125	2	22.1	-0.84	3	4	4	1	0	4	2	2.57143	0	1	1	0	0	0	0	0.285714
13.6975	Chica	152	54.4	23.5457	12	16	135	2.1	19.9	-1.11	0	1	1	0	0	0	1	0.428571	0	0	0	1	0	0	0	0.142857
13.7002	Chica	163	41	15.4315	24	15	134		17	-0.59
13.7112	Chica	161	58	22.3757	22	18	148	3.5	25.5	-0.22	0	0	0	0	0	0	0	0	0	0	0	0	0	0	0	0
13.7112	Chica	161	50	19.2894	20	15	112	4	19	-0.93	0	1	0	0	0	1	0	0.285714	1	0	0	0	0	0	0	0.142857
13.7303	Chica	166	58	21.048	19	39	155	3.5	24	-0.38	0	0	3	0	0	0	1	0.571429	0	0	0	0	0	0	0	0
13.7358	Chica	159	41.9	16.5737	27	16	140	4.04	19.6	-0.27
13.7358	Chica	154	45.8	19.3119	22	15	163	7.42	23.1	-0.18	0	0	0	0	1	0	0	0.142857	1	0	0	0	0	0	0	0.142857
13.7522	Chica	156	49	20.1348	18	22	157	3	16.8	-0.72	0	0	0	0	0	0	0	0	0	0	0	0	0	0	0	0
13.7632	Chica				21	21	133	5
13.7659	Chica	157	37	15.0108	23	15	175	2.5	22.5	-0.04	0	0	0	0	0	0	0	0	0	0	0	0	0	0	0	0
13.7714	Chica	155	56	23.3091	14	25	136	3.41	20.9	-0.96	0	0	0	0	0	0	0	0	0	0	0	0	0	0	0	0
13.7769	Chica	162	68	25.9107	20	17		4	23.4		4	0	1	0	1	0	1	1	1	1	1	0	1	0	1	0.714286
13.7796	Chica	163	49.4	18.5931	22	22	171	5.5	24.8	-0.04	0	0	0	0	0	0	0	0	0	0	0	0	0	0	0	0
13.8152	Chica	172	64	21.6333	20	15	90	3.5	27	-0.8	0	1	1	0	1	1	0	0.571429	0	0	1	0	0	0	0	0.142857
13.8261	Chica	158	53	21.2306	30	30	120	3	15	-0.48	0	1	1	0	0	0	0	0.285714	0	0	0	0	1	0	0	0.142857
13.8289	Chica	147	46.2	21.38	26	29	133	1.5	31.5	0.11
13.8344	Chica	152	40	17.313	20	24	170	5.5
13.8535	Chica	165	68.7	25.2342	18	20	130	2.5	21	-0.79	0	0	0	0	0	0	1	0.142857	0	0	0	0	0	0	1	0.142857
13.859	Chica	166	48	17.4191	10	15	100	1.5	17.4	-1.65
13.8617	Chica	158	62.3	24.9559	17	20	140	3	23.9	-0.63	0	0	0	0	0	0	0	0	0	0	0	0	0	0	0	0
13.8754	Chica	158	60	24.0346	21	23	145	3	16	-0.7	0	0	0	0	0	0	0	0	0	0	0	0	0	0	0	0
13.9028	Chica	167	72	25.8166	18	31	145	2.5	23	-0.57
13.9083	Chica	158	47	18.8271	17	17	120	2.25	14.3	-1.21	0	0	1	0	0	0	0	0.142857	0	1	1	0	0	0	0	0.285714
13.9083	Chica	166	50.2	18.2174	18	27	190	5.5	25.7	-0.04	0	1	3	0	0	0	2	0.857143	0	1	1	0	0	0	1	0.428571
13.922	Chica	157	53	21.5019	20	28	190	3	23.4	-0.03
13.9357	Chica	158	54.4	21.7914	15	15	120	2	12.1	-1.41
13.9436	Chica	160	65	25.3906	17	12	85	1.5	24.8	-1.1	0	0	0	0	0	0	0	0	0	0	0	0	0	0	0	0
13.9546	Chica										0	0	3	0	0	0	0	0.428571	0	1	0	0	0	0	0	0.142857
13.9546	Chica										0	0	1	0	0	0	1	0.285714	0	0	0	0	0	0	0	0
13.9573	Chica	167	49.6	17.7848	20	12	110	2	19	-0.95	0	0	0	0	0	0	0	0	0	0	0	0	0	0	0	0
13.9576	Chica	163	58	21.83	21	28	145	3	24.3	-0.35	0	1	1	0	0	0	1	0.428571	0	0	0	0	0	0	0	0
13.9576	Chica	154	51	21.5045	19	25	128	3	19.2	-0.83	1	1	1	0	1	0	1	0.714286	1	3	1	1	0	1	0	1
13.971	Chica										0	1	1	1	0	0	1	0.571429	1	1	1	1	1	0	1	0.857143
13.9713	Chica	174	80	26.4236		15	130	2	21.3		0	0	0	0	0	0	0	0	0	0	0	0	0	0	0	0
13.9767	Chica	148	45.7	20.8638	23	33	140	3.25	18.7	-0.52	0	0	0	0	0	0	1	0.142857	0	0	0	0	0	0	0	0
13.9822	Chica	157	56.8	23.0435	23	37	128	5.25	18.8	-0.63	1	3	4	1	0	1	3	1.85714	0	1	0	0	0	1	0	0.285714
13.9874	Chica	156	51.3	21.0799	20	8	130	4	26.6	-0.45	0	0	0	0	1	0	0	0.142857	1	1	0	1	0	1	0	0.571429
14.0096	Chica				13	26	100	1
14.0151	Chica	163	72	27.0993	17	15	115	2	17.2	-1.14
14.0233	Chica	159	50.4	19.9359	17	28	93	2.75	12.9	-1.52	0	4	4	4	0	0	0	1.71429	0	0	0	0	0	0	0	0
14.0315	Chica	170	58.7	20.3114	28	10	164	7.3	28.4	0.37	0	0	0	0	0	0	0	0	0	0	0	0	0	0	0	0
14.037	Chica	162	55.9	21.3001	32	30	169	8	27.2	0.58	0	0	1	0	0	0	1	0.285714	1	0	0	0	0	1	1	0.428571
14.0452	Chica
14.0479	Chica	171	92.8	31.7363	25	24	145	3	40	0.51	1	1	1	0	0	1	1	0.714286	0	0	2	0	0	1	0	0.428571
14.0671	Chica	152	51.7	22.3771	15	14	138	4.25	23.1	-0.79	1	2	1	0	0	1	0	0.714286	0	0	0	0	0	0	0	0
14.0887	Chica	164	97.1	17.3942	17	16	110	1.5	32.4	-0.56	0	0	0	0	0	0	0	0	0	0	0	0	0	0	0	0
14.0917	Chica	158	48	19.2277	28	26	160	6.3			0	0	1	0	0	0	0	0.142857	0	0	0	0	0	0	0	0
14.1164	Chica	155	45.6	18.9802	23	9	115	4.5	24.3	-0.52	1	1	1	0	1	0	0	0.571429	0	0	0	0	0	0	0	0
14.1164	Chica
14.1218	Chica	169	62.3	21.813	20	24	137	3	36.7	0.03	1	2	1	0	0	1	0	0.714286	0	1	0	0	0	3	0	0.571429
14.1273	Chica	147	47	21.7502	11	26	120	4	28.5	-0.95
14.1297	Chica	160	49.9	19.4922	21	30	135	4	24	-0.46	0	1	0	0	0	0	0	0.142857	0	0	0	0	0	0	0	0
14.1489	Chica										1	4	4	0	0	2	1	1.71429	1	0	0	0	0	0	0	0.142857
14.1547	Chica	161	71.3	27.5067	15	21	120	4.1	20.4	-1.07	0	0	1	0	0	0	0	0.142857	0	0	0	0	0	0	0	0
14.1656	Chica	146	40	18.7652	16	17	110	3.5	21.4	-1.06	0	0	0	0	0	0	0	0	0	1	1	0	0	0	0	0.285714
14.1684	Chica				23	13	120	2	21	-0.61	0	0	0	0	0	0	0	0	0	0	0	0	0	0	0	0
14.1684	Chica	154	47.1	19.86	20	23	110	3.75	22.8	-0.79	0	0	0	0	0	0	0	0	0	0	0	0	0	0	0	0
14.1684	Chica	155	50.7	21.103	14	26	82	3.75	20.7	-1.46	0	1	1	1	0	0	1	0.571429	0	1	1	0	1	0	1	0.571429
14.179	Chica	163	53.3	20.061	22	27	140	3	24.8	-0.32	0	0	0	0	0	0	0	0	0	0	0	0	0	0	0	0
14.1793	Chica	158	52.1	20.8701	14	16	153	6.1	27	-0.55	0	0	0	0	0	0	0	0	0	0	0	0	0	0	0	0
14.1793	Chica	161	78	30.0914	20	15	120		24.5	-0.63
14.1954	Chica										1	1	1	0	0	0	0	0.428571	0	0	0	0	0	0	0	0
14.2067	Chica	159	36	14.2399	16	10	146	6.1	15.6	-0.97	0	1	1	0	1	0	0	0.428571	0	1	0	0	0	0	0	0.142857
14.2091	Chica										0	1	1	0	0	0	1	0.428571	0	0	0	0	0	0	0	0
14.2177	Chica				14		138	1.5	32.5	-0.46
14.2228	Chica	159	54	21.3599		15	100	2	16.3		0	0	0	0	0	0	0	0	0	0	0	0	0	0	0	0
14.2259	Chica	163	45.2	17.0123	21	30	180	6	24.4	-0.03	0	0	0	0	0	0	0	0	0	0	0	0	0	0	0	0
14.2368	Chica	160	50.9	19.8828	32	13	160	4.3			0	3	1	0	1	1	1	1	0	2	1	0	0	0	0	0.428571
14.245	Chica	163	54.7	20.5879	37	29	140	5	17.2	0.18	0	0	0	0	0	0	0	0	0	0	0	0	0	0	0	0
14.2478	Chica	162	59.8	22.7862	20	30	120	4	25.5	-0.59	0	1	1	0	0	1	0	0.428571	0	0	0	0	0	0	0	0
14.2501	Chica	162	41.6	15.8512		5	145	2	24.5		0	1	1	1	1	0	1	0.714286	0	1	1	1	0	0	0	0.428571
14.256	Chica							3.5			0	0	0	0	0	0	0	0	0	0	0	0	0	0	0	0
14.2611	Chica	161	51.1	19.7137		40	168	5	25.1		0	0	0	0	0	0	0	0	0	0	0	0	0	0	0	0
14.2642	Chica	162	50.7	19.3187	11	8	111		22.2	-1.29	0	0	4	0	0	0	1	0.714286	0	0	0	0	0	0	0	0
14.2779	Chica	160	47.1	18.3984	28	2	174	6.75	20.3	0.13	0	0	0	0	0	0	0	0	0	0	0	0	0	0	0	0
14.2861	Chica	156	54.3	22.3126	22	33	160	5	35.7	0.31	0	0	0	0	0	0	0	0	0	0	0	0	0	0	0	0
14.3107	Chica	152	69.3	29.9948	17	15	100	1.5	17.2	-1.28	0	0	1	0	0	0	1	0.285714	1	1	1	0	0	0	0	0.428571
14.3107	Chica	158	80.8	32.3666	13	21	80	2.25	25.2	-1.35	3	4	4	1	0	3	4	2.71429	1	3	2	0	0	0	0	0.857143
14.3107	Chica	157	79.9	32.4151	16	15	92	2.5	24.8	-1.09	1	4	4	1	0	3	4	2.42857	0	1	1	0	0	0	1	0.428571
14.3162	Chica	152	53.7	23.2427	19	3	115	3	21.3	-0.86	0	0	0	0	0	0	0	0	0	0	0	0	0	0	0	0
14.319	Chica	161	59	22.7615	22	20	146	5	23.6	-0.32	0	0	0	0	0	0	1	0.142857	0	0	0	0	0	0	0	0
14.3213	Chica	166	61.4	22.2819	29	22	146	2	28.4	0.26	0	1	3	0	0	0	4	1.14286	0	0	0	0	0	0	0	0
14.324	Chica	167	60.4	21.6573		29	120	1.5	24.2		1	2	1	2	0	0	2	1.14286	0	1	0	0	0	0	1	0.285714
14.3299	Chica	162	65.3	24.8819	30	16	120	7.25	26.1	-0.02	1	1	1	0	0	0	4	1	0	0	0	0	0	0	0	0
14.3628	Chica	166	49	17.782	23	15	154	4.5	21.3	-0.29	0	0	0	0	0	0	0	0	0	0	0	0	0	0	0	0
14.3737	Chica	160	52.8	20.625	23	16	106	3.75	19.6	-0.8	0	2	2	1	0	2	3	1.42857	0	1	0	0	0	0	0	0.142857
14.3737	Chica	153	48.7	20.804	31	15	180	4	19.2	0.3	0	0	0	0	0	0	0	0	0	0	0	0	0	0	0	0
14.3765	Chica	164	50.2	18.6645	32	20	155	9.3	23.1	0.29	0	0	0	0	0	0	0	0	0	0	0	0	0	0	0	0
14.3815	Chica					28	155	3
14.3842	Chica	158	47.1	18.8672	13	15	125	2.5	17.1	-1.27	0	0	0	0	0	0	0	0	0	0	0	0	0	0	0	0
14.3847	Chica	158	56.2	22.5124	17	25	135	2	24.9	-0.64	0	1	0	0	0	1	0	0.285714	0	0	0	0	0	0	0	0
14.3874	Chica	161	65.1	25.1148	25	19	119	4.25	23.1	-0.42	2	0	0	0	0	0	0	0.285714	0	0	0	0	0	0	2	0.285714
14.3897	Chica	166	63.3	22.9714	25	23	178	5	24.9	0.19	0	0	0	0	0	0	0	0	0	0	0	0	0	0	0	0
14.3901	Chica	163	80.6	30.3361		14	104	2	17.9		0	0	0	0	0	0	0	0	0	0	0	0	0	0	0	0
14.3952	Chica	162	50.4	19.2044	18	8	149	2.5	21.9	-0.58	0	1	1	1	1	1	1	0.857143	0	1	1	0	0	0	0	0.285714
14.3956	Chica	159	55.4	21.9137	25	11	110	4	19.6	-0.65	0	0	1	0	0	0	0	0.142857	0	0	0	0	0	0	0	0
14.4038	Chica	161	62.4	24.0731	17	10	120	2	25.4	-0.75	0	0	0	0	0	0	0	0	0	0	0	0	0	0	0	0
14.4066	Chica	174	53.3	17.6047	14	14	122	3	19.3	-1.15	0	0	0	0	0	0	0	0	0	0	0	0	0	0	0	0
14.4066	Chica
14.4171	Chica	164	48.6	18.0696		8	140	5	22.8		0	0	1	0	0	0	0	0.142857	0	1	0	0	0	0	0	0.142857
14.4171	Chica	166	58	21.048		21	140	5	23.7
14.4203	Chica	157	50	20.2848	15	22	146	2	24	-0.68	0	1	1	1	1	1	0	0.714286	0	0	0	0	1	0	0	0.142857
14.4226	Chica	170	65	22.4913		17	105	3	24.1		1	4	4	2	2	4	4	3	0	0	0	0	0	0	0	0
14.423	Chica	154	60.2	25.3837	25	17	110	3	26.6	-0.36	0	1	1	0	0	0	4	0.857143	0	1	1	0	0	0	0	0.285714
14.4253	Chica	163	76.8	28.9059	20	14	104	1.5	22.2	-0.87	0	0	0	0	0	0	0	0	0	0	0	0	0	0	0	0
14.4308	Chica	157	48.6	19.7168				3.5	19.7		0	2	3	0	2	0	4	1.57143	0	0	0	0	0	0	0	0
14.4339	Chica	158	48.5	19.428	11	26	162	4.45	25.8	-0.68	0	1	0	0	0	0	1	0.285714	0	0	0	0	0	0	0	0
14.4449	Chica	166	61.3	22.2456	35	20	157	4.3	30.77	0.78	0	1	1	0	0	0	0	0.285714	0	0	2	0	0	0	0	0.285714
14.4636	Chica	155	42.6	17.7315	31	21	160	3	17.1	0.03	0	0	0	0	0	1	1	0.285714	0	0	0	0	0	0	0	0
14.4668	Chica	152	61.8	26.7486	17	21	68	2.5	18.4	-1.52	0	3	1	1	1	1	2	1.28571	0	0	1	1	0	0	1	0.428571
14.4718	Chica	150	45.8	20.3556	22	29	174	2.5	18.8	-0.26	0	0	0	0	0	0	0	0	0	0	0	0	0	0	0	0
14.4718	Chica	160	49.8	19.4531		35	145	8	23		1	2	2	0	1	1	0	1	1	1	1	0	0	1	0	0.571429
14.4805	Chica	164	57.8	21.4902	16	15	160	5.5	22.5	-0.56	0	0	0	0	0	0	0	0	0	0	0	0	0	0	0	0
14.4828	Chica	158	58.3	23.3536		21	135	4	22.7		1	0	1	0	1	0	0	0.428571	0	0	0	0	0	0	0	0
14.4832	Chica	160	46.8	18.2812	20	24	150	5.5	36	0.12	0	0	0	0	1	0	0	0.142857	0	0	0	0	0	0	0	0
14.5024	Chica	162	50.7	19.3187	21	10	133	3.42	23.4	-0.5	0	1	1	0	1	0	0	0.428571	1	0	0	0	0	0	0	0.142857
14.5024	Chica	170	54.4	18.8235	20	25	100	4	22.4	-0.9
14.5024	Chica	153	55.6	23.7515	37	18	170	5	25.4	0.79	1	1	2	0	0	2	4	1.42857	2	1	1	0	2	1	0	1
14.5079	Chica				23	23	140	5.5	27.8	-0.14
14.5129	Chica	162	44.3	16.88	24	20	170	5.5	28.4	0.21	0	0	0	0	0	0	0	0	0	0	0	0	0	0	0	0
14.5188	Chica	161	63.4	24.4589	23	3	110	6	18.8	-0.79	0	1	2	0	0	0	1	0.571429	0	0	0	0	0	0	0	0
14.5243	Chica	161	48	18.5178	22	3	110	2.5	18.3	-0.87	0	1	4	0	0	0	4	1.28571	3	4	1	1	0	1	0	1.42857
14.5243	Chica	158	56.5	22.6326	13	25	129	3.3	20.6	-1.09	1	0	0	0	0	0	0	0.142857	0	0	0	0	0	0	0	0
14.5293	Chica	157	51	20.6905		25	140	3	20.4		0	0	2	0	0	1	1	0.571429	0	2	0	0	0	1	0	0.428571
14.5352	Chica	146	76.6	35.9354	21	14	80	2.75	16	-1.29	0	1	1	0	0	0	0	0.285714	0	1	1	0	0	0	0	0.285714
14.5352	Chica	139	49.5	25.6198	23	17	84	3	17.5	-1.08	0	0	0	0	0	0	0	0	0	0	0	0	0	0	0	0
14.538	Chica	160	50	19.5312	13		146	2	15.7	-1.13
14.5489	Chica	159	55.4	21.9137	28	16	145	5	23.7	0
14.5594	Chica	166	71.3	25.8746		23	150	4.5	28.2
14.5731	Chica	173	56.6	18.9114		31	150	3	20.4		0	0	0	0	0	0	0	0	0	0	0	3	0	0	0	0.428571
14.5813	Chica	157	56	22.719	21	28	155	6.5	32.8	0.09	1	2	3	0	0	1	1	1.14286	0	1	1	0	0	0	0	0.285714
14.5868	Chica	171	53.3	18.2278		17	150	5	18.7		0	0	0	0	0	0	0	0	0	0	0	0	0	0	0	0
14.5927	Chica	165	45	16.5289	27	5	125	4.3	32.7	0.14	0	0	0	0	0	0	0	0	0	0	0	0	0	0	0	0
14.6059	Chica	170	52.7	18.2353		25	155	6	21.8		0	0	0	0	0	0	4	0.571429	0	0	1	0	0	0	1	0.285714
14.6146	Chica	169	66.5	23.2835	16	21	158	2.48	27.2	-0.38	0	1	0	1	0	0	1	0.428571	0	1	1	0	0	0	0	0.285714
14.6196	Chica	165	56.6	20.7897		29	170	5	29.6
14.6366	Chica	162	78	29.7211	20	16	107	1	27.7	-0.61
14.6475	Chica	160	50.5	19.7266	20	9	165	4	30.4	0.03	3	1	4	0	0	0	0	1.14286	0	1	1	0	0	0	0	0.285714
14.6579	Chica	170	63	21.7993		35	155	3.5	27.5		0	0	0	0	0	0	0	0	0	0	0	0	0	0	0	0
14.6612	Chica	169	63.6	22.2681	27	19	155	5.3	21.5	-0.05	0	0	0	0	0	0	0	0	0	0	0	0	0	0	0	0
14.6661	Chica										0	0	0	0	0	0	1	0.142857	0	0	0	0	0	0	0	0
14.6694	Chica	169	58.8	20.5875	17	17	142	3	24.6	-0.58
14.6907	Chica	153	41.7	17.8137	14	12	119	2	15.3	-1.34	0	0	0	0	0	0	1	0.142857	0	1	0	0	0	0	0	0.142857
14.6913	Chica	167	49.5	17.7489	17	15	120	3	20.7	-0.95
14.6968	Chica	165	50.7	18.6226	26	37	173	6.1	17.5	-0.11	0	1	2	0	0	0	1	0.571429	0	0	0	0	0	0	0	0
14.6968	Chica	166	47.4	17.2013	18	18	201	10.41	22.2	-0.09	1	2	2	1	1	1	1	1.28571	0	1	0	0	1	1	0	0.428571
14.7044	Chica	157	40.7	16.5118		19	140	3	17.4		0	0	0	0	0	0	0	0	0	0	0	0	0	0	0	0
14.7105	Chica	167	39.3	14.0916	10	21	139	5.1	15.4	-1.37	0	1	1	0	1	3	0	0.857143	0	1	1	0	0	1	0	0.428571
14.7154	Chica	162	45.6	17.3754		22	150	5	24.5		0	1	2	0	1	0	0	0.571429	0	0	0	0	0	0	0	0
14.7209	Chica										0	0	0	0	0	0	2	0.285714	0	0	1	0	0	0	0	0.142857
14.7236	Chica	154	55.1	23.2333		31	150	2.5	18.1
14.7291	Chica	168	56.8	20.1247		20	130	2	26.4		0	0	0	0	0	0	0	0	0	0	0	0	0	0	0	0
14.7427	Chica	170	65.2	22.5606		27	180	3.5	20.6		1	0	0	0	1	0	0	0.285714	0	0	0	0	0	0	1	0.142857
14.7455	Chica	162	91.5	19.3496	19	30	135	1.5	16.9	-0.86	0	0	0	0	0	0	0	0	0	0	0	0	0	0	0	0
14.7461	Chica	164	77	28.6288	15	15	112	1.5	19.2	-1.19	0	0	1	0	0	0	1	0.285714	0	1	0	0	0	0	0	0.142857
14.7488	Chica	171	76.5	26.1619					27.8		0	0	0	0	0	0	0	0	0	0	0	0	0	0	0	0
14.7537	Chica	167	45	16.1354		5	140	1	19.7		0	0	4	0	1	0	1	0.857143	0	1	0	0	0	0	0	0.142857
14.7537	Chica	162	46.6	17.7564		15	180	6.5	21.9
14.7543	Chica	158	56.6	22.6726	22	23	150	3	24.5	-0.24	0	0	0	0	0	0	0	0	0	0	0	0	0	0	0	0
14.757	Chica	162	93.6	35.6653	20	26	110	2.5	24.6	-0.72	0	0	0	0	0	0	0	0	0	0	0	0	0	0	0	0
14.7756	Chica	162	56.4	21.4906		21	120	5	24.3		0	0	1	0	0	0	1	0.285714	0	1	1	0	0	0	1	0.428571
14.7783	Chica	170	61	21.1073		21	140	3	24.9		0	0	0	0	0	0	0	0	0	0	0	0	0	0	0	0
14.7811	Chica	165	53	19.4674		31	166	5	20.7		0	0	1	0	0	0	0	0.142857	0	0	1	0	0	0	0	0.142857
14.7811	Chica	171	73.5	25.1359		12	110	5	30.8
14.792	Chica	155	46.5	19.3548	16	16	130	2.5	16.3	-1.09	0	1	2	1	1	1	1	1	0	1	1	0	0	0	0	0.285714
14.8002	Chica	159	57.2	22.6257		26	165	3.5	21.2		0	0	0	0	0	0	0	0	0	0	0	0	0	0	0	0
14.82	Chica	156	43	17.6693	14	23	123	3.04	19.1	-1.15	0	1	1	0	0	0	1	0.428571	0	0	0	0	0	0	0	0
14.8358	Chica										0	0	0	0	0	0	0	0	0	0	0	0	0	0	0	0
14.8385	Chica	157	69.8	28.3176		10	110	2.5	13.2		0	0	0	0	0	0	0	0	0	0	0	0	0	0	0	0
14.8413	Chica	151	44	19.2974		33	130	4.5	16.2		0	0	0	0	0	0	0	0	0	0	0	0	0	0	0	0
14.8446	Chica	157	55	22.3133	10	12		1.1	23.4		0	0	0	0	1	0	0	0.142857	2	1	0	0	1	0	0	0.571429
14.8474	Chica	154	37.6	15.8543	31	17	95	3.5	14	-0.7
14.8495	Chica	168	54	19.1327		34	130	7	23.5		0	1	0	0	1	0	0	0.285714	0	1	0	0	0	0	0	0.142857
14.8611	Chica	159	60.5	23.931	15	23	100	4.25	21.3	-1.21	1	1	1	0	1	0	1	0.714286	1	1	0	0	0	0	0	0.285714
14.8659	Chica	169	73.3	25.6644	27	15	130	2	21.2	-0.29	0	0	0	0	0	0	1	0.142857	0	4	1	0	0	0	1	0.857143
14.8659	Chica	152	39.9	17.2697		20	160	5	23.7		0	0	0	0	0	0	0	0	0	1	0	0	0	1	1	0.428571
14.8768	Chica	159	58.5	23.1399	17	14	155	3	24.6	-0.47	2	1	2	0	0	0	1	0.857143	0	1	0	0	0	0	0	0.142857
14.8768	Chica										0	0	0	0	0	1	1	0.285714	0	0	0	0	0	0	0	0
14.8878	Chica	150	51	22.6667		17	100	3	16.3		0	0	0	0	0	0	0	0	0	0	0	0	0	0	0	0
14.896	Chica	170	67.3	23.2872		20	200		29.9		1	1	2	1	0	0	0	0.714286	1	1	1	0	0	0	0	0.428571
14.8966	Chica	159	50.4	19.9359	28	27	110	2.5	13.8	-0.73	0	0	1	0	0	0	0	0.142857	0	0	0	0	0	0	0	0
14.9103	Chica	154	45.5	19.1854	14	25	142		21.8	-0.86	0	0	0	0	0	0	0	0	0	0	0	0	0	0	0	0
14.9179	Chica	164	62	23.0518	17	21	133	2.5	24.8	-0.66	0	0	1	0	0	0	2	0.428571	0	0	0	0	0	0	0	0
14.9234	Chica	166	61.4	22.2819		25	170	3.5	19.6		0	0	2	0	2	0	1	0.714286	0	0	0	0	0	0	0	0
14.9268	Chica	152	58.3	25.2337					17.1		0	1	0	0	0	0	1	0.285714	0	0	0	0	0	0	0	0
14.9371	Chica										0	0	0	0	0	0	0	0	0	0	0	0	0	0	0	0
14.9459	Chica	166	64.8	23.5157	16	29	135	2.4	26.4	-0.63	0	1	0	0	0	1	0	0.285714	0	1	0	0	0	0	0	0.142857
14.9699	Chica	167	65.4	23.4501	24	26	165	3.5	28.7	0.18	0	0	0	0	0	0	0	0	0	0	0	0	0	0	0	0
14.9863	Chica	155	57.6	23.975		26	140	3.5	26.7		0	1	1	0	0	1	0	0.428571	0	0	0	0	0	0	0	0
15.0164	Chica					21	135	5.5			0	1	0	0	0	0	0	0.142857	0	0	0	0	0	0	0	0
15.0171	Chica	160	47	18.3594	25	20	155	5.3	22.2	-0.13	0	1	1	1	0	0	1	0.571429	1	4	4	1	1	1	2	2
15.0226	Chica
15.0281	Chica	158	87.9	35.2107	11	32	115	1.28	25.7	-1.11	0	0	1	0	1	1	0	0.428571	0	1	0	0	0	0	0	0.142857
15.0328	Chica	159	58.5	23.1399		30	135	2.5	23.4
15.0335	Chica	156	44.8	18.4089	22	23			23.7		0	0	0	0	0	0	0	0	0	0	0	0	0	0	0	0
15.0493	Chica	161	46.3	17.862	25	27	160	6.5	16.6	-0.32	0	1	0	0	0	0	0	0.142857	0	1	0	0	0	0	0	0.142857
15.052	Chica										0	1	1	0	0	2	1	0.714286	0	0	0	0	0	0	0	0
15.0547	Chica	159	60.2	23.8123		15	125	3.5	13.5		0	0	0	0	0	0	0	0	0	0	0	0	0	0	0	0
15.0582	Chica	158	45.7	18.3064	17	33	130	5.5	18.2	-0.96	0	0	0	0	0	0	0	0	0	1	0	0	0	0	0	0.142857
15.0582	Chica	154	47.9	20.1973	25	15	177	7	24.3	0.16	3	3	1	0	3	0	1	1.57143	0	3	2	1	1	0	0	1
15.0602	Chica	169	61.4	21.4978		20	150	2	19.8
15.0629	Chica	155	46	19.1467		7	136	4	25.7		0	0	0	0	0	0	0	0	0	0	0	0	0	0	0	0
15.0684	Chica	168	50.3	17.8217		22	160	5	30.4		0	0	1	0	0	0	0	0.142857	0	0	0	0	0	0	0	0
15.0719	Chica	149	37	16.6659	27	16	135	3	16.9	-0.42	0	1	1	1	0	1	1	0.714286	0	0	0	0	0	0	0	0
15.0746	Chica	166	75.7	27.4713	20	29	150	4.5	30.9	-0.09	0	1	1	0	0	0	0	0.285714	1	1	0	0	0	0	0	0.285714
15.0773	Chica	148	47.1	21.5029	24	19	130	3.5	12.6	-0.81	0	1	2	0	2	3	4	1.71429	0	0	0	0	1	1	0	0.285714
15.0856	Chica	159	61.8	24.4452	31	19	125	4.5	21	-0.13	1	1	0	0	0	1	0	0.428571	1	1	0	0	0	0	0	0.285714
15.0903	Chica	165	98	35.9963		15	121	2	25.8		0	0	0	0	0	0	0	0	0	0	0	0	0	0	0	0
15.091	Chica	161	81.2	31.326	21	33	100	4	22.2	-0.85	1	1	2	1	1	1	1	1.14286	0	1	0	0	0	1	0	0.285714
15.0965	Chica
15.1013	Chica	160	53	20.7031		35	140	6	21
15.1102	Chica	155	44.7	18.6056	24	20	157	3.5	18.4	-0.32	0	1	1	0	0	0	0	0.285714	0	0	0	0	0	1	0	0.142857
15.1368	Chica	172	55.8	18.8615		40	152	6	32.5		0	0	1	0	0	0	1	0.285714	0	0	0	0	0	1	0	0.142857
15.1403	Chica	167	69.6	24.9561	25	20	140	4	27.6	-0.04	0	0	0	0	1	0	1	0.285714	0	0	0	0	1	0	1	0.285714
15.1403	Chica	152	51.1	22.1174	20	15	124		22.8	-0.66	0	0	1	0	0	4	1	0.857143	0	4	0	0	0	0	0	0.571429
15.1423	Chica	167	64	22.9481		6	90	2	19.4		0	0	0	0	0	0	0	0	0	0	0	0	0	0	0	0
15.1505	Chica	165	66.1	24.2792	20	26	100	6	25.8	-0.76	0	0	0	0	0	0	0	0	0	0	0	0	0	0	0	0
15.1567	Chica	161	49.4	19.0579	17	27	153	4	18.5	-0.74
15.1642	Chica	165	52.7	19.3572				3.5	20.9		0	1	1	1	0	0	1	0.571429	0	0	1	0	0	0	1	0.285714
15.1669	Chica	162	56.3	21.4525		25	140	2.5	21.9
15.1677	Chica	154	71	29.9376	21	18	72	1.75	26.9	-0.91	0	1	1	0	0	0	0	0.285714	0	1	1	0	0	0	0	0.285714
15.1724	Chica	174	63	20.8086		28	120	3	25.5		0	0	0	0	0	0	0	0	0	0	0	0	0	0	0	0
15.1752	Chica	164	71	26.398		28	190	7	30.4		0	0	1	0	0	0	2	0.428571	0	0	1	0	0	0	0	0.142857
15.1752	Chica	168	52.8	18.7075	19	26	160	7	24.9	-0.3	0	0	0	0	0	0	0	0	0	0	0	0	0	0	0	0
15.1861	Chica	162	55	20.9572	22	29	180	4.5	25.8	0.09	0	0	0	0	0	0	1	0.142857	0	0	0	0	0	0	0	0
15.1888	Chica	162	47.8	18.2137		22	170	5.5	22.1		0	0	0	0	0	0	0	0	0	1	0	0	0	0	0	0.142857
15.1923	Chica	165	50.8	18.6593	21	19	175	5	21.2	-0.21	0	1	4	0	0	0	1	0.857143	0	0	1	0	0	0	0	0.142857
15.1951	Chica	168	52.2	18.4949	24	7	116	4.25	21.7	-0.56	0	2	1	0	0	0	3	0.857143	1	0	0	0	0	0	0	0.142857
15.1998	Chica	164	47.6	17.6978		38	175	7	20.4
15.2025	Chica	166	81.7	29.6487	23	15	140	5	31.5	0.01	0	0	0	0	0	0	0	0	0	0	0	0	0	0	0	0
15.2053	Chica	161	57.1	22.0285		35	160	3	27.3
15.2142	Chica	161	53.7	20.7168	19	4	129	4.25	22.2	-0.69	1	1	4	0	0	0	4	1.42857	0	1	1	0	1	0	0	0.428571
15.2271	Chica	162	63.7	24.2722	19	16	130	3	26	-0.53	0	1	2	0	0	0	0	0.428571	0	0	0	0	0	0	0	0
15.2279	Chica	174	59.6	19.6856					22.7		0	0	1	0	0	0	1	0.285714	0	0	0	0	0	0	0	0
15.2326	Chica	166	66.7	24.2053		15	140	2.5	26
15.2354	Chica	163	62	23.3355	27	38	200	5.5	31	0.76	0	0	1	0	0	0	1	0.285714	0	0	0	0	0	0	0	0
15.2361	Chica	160	61.8	24.1406	35	41	170	6.5	24.5	0.64	0	0	0	0	0	0	1	0.142857	0	0	0	0	0	0	0	0
15.2471	Chica	162	56.4	21.4906	23	16	130	3.3	19.4	-0.58	0	0	0	0	0	0	0	0	0	0	0	0	0	0	0	0
15.2518	Chica	157	71.3	28.9261	15	31		4	23.6		0	0	0	0	0	0	0	0	0	1	0	0	0	0	1	0.285714
15.2518	Chica	157	43.8	17.7695	28	38	118	7	21.9	-0.32	0	1	1	0	0	0	1	0.428571	0	0	0	0	0	0	1	0.142857
15.26	Chica	158	73.7	29.5225	21	26	145	3.5	25.5	-0.3	0	1	1	0	0	0	1	0.428571	0	0	0	0	0	0	0	0
15.26	Chica	164	51	18.9619	26	23	130	4.5	22.8	-0.28	0	0	0	0	0	0	0	0	0	0	0	0	0	0	0	0
15.2772	Chica	164	75.8	28.1826	22	3	135	3	23.4	-0.43	0	0	0	0	0	0	0	0	0	0	0	0	0	0	0	0
15.2909	Chica	167	51.1	18.3226	22	8	190	5	38.5	0.7	0	1	1	0	0	0	1	0.428571	0	0	1	0	0	0	0	0.142857
15.301	Chica	165	63.9	23.4711	27	32		3.5	19.9		0	0	1	1	0	1	0	0.428571	0	0	0	0	0	0	0	0
15.3101	Chica	146	45.4	21.2986	16	27	145	2	19.7	-0.81
15.3101	Chica	155	50.3	20.9365	27	10	155	6.3	22.8	0	0	0	0	0	1	1	4	0.857143	0	2	2	0	0	1	0	0.714286
15.3155	Chica	171	52.4	17.92	28	27	120		19.3	-0.41	0	1	2	1	0	0	1	0.714286	0	1	0	0	0	0	0	0.142857
15.3175	Chica	160	70.5	27.5391	15	22	120	2.5	19.5	-1.11	0	0	0	0	0	0	0	0	0	0	0	0	0	0	0	0
15.321	Chica	167	63.4	22.733	29	35	165	4.3	21.5	0.15	0	0	0	0	0	0	0	0	0	0	0	0	0	0	0	0
15.3238	Chica	164	45.6	16.9542	18	10	128	4	16.5	-0.99	3	4	3	1	3	3	1	2.57143	0	1	1	1	1	0	0	0.571429
15.3284	Chica	162	54.9	20.9191	27	28	112	3.5	26.3	-0.25	0	1	1	0	0	0	1	0.428571	0	0	0	0	0	0	0	0
15.3311	Chica	165	53	19.4674		27	145	6	20.4		1	1	2	0	0	1	2	1	0	1	1	0	0	0	1	0.428571
15.3339	Chica	157	50.2	20.3659	26	31	122	5.5	19.9	-0.47	0	0	1	0	0	1	1	0.428571	0	1	1	0	0	1	0	0.428571
15.3374	Chica				14	33	90	1
15.3476	Chica	161	65.5	25.2691	24	26	108	6.5	21.5	-0.64	0	0	0	0	0	0	0	0	0	0	0	0	0	0	0	0
15.3503	Chica	161	39.7	15.3158		5	110	2.5	15.9
15.3511	Chica	165	48.1	17.6676	27	0	149	5.5	22.2	-0.08	4	4	4	4	0	4	4	3.42857	0	1	0	0	0	0	0	0.142857
15.3539	Chica	158	40.1	16.0631	25	15	165	5	23	-0.01	0	0	0	0	0	0	0	0	0	0	0	0	0	0	0	0
15.3566	Chica	160	54	21.0938		17	170		26.6
15.3593	Chica	165	76	27.9155	15	15	155	2	25.2	-0.55
15.364	Chica	158	73	29.2421	20	26	142	3	32.2	-0.11	0	0	0	0	0	0	0	0	0	0	0	0	0	0	0	0
15.364	Chica	156	50.7	20.8333	23	26	122	3.5	24.8	-0.43	0	0	0	0	0	0	0	0	0	0	0	0	0	0	0	0
15.3676	Chica	153	53	22.6409	22	15	135	3	20.4	-0.55	0	4	4	0	0	4	2	2	0	0	0	0	0	1	0	0.142857
15.3676	Chica	159	56.7	22.4279	19	14	179	8.18	35.1	0.3	0	1	1	0	0	0	3	0.714286	0	0	0	0	0	0	0	0
15.3758	Chica	180	53	16.358	30	5	185	7	30.9	0.78	0	1	0	0	0	0	0	0.142857	0	0	0	0	0	0	0	0
15.3859	Chica	163	47.4	17.8403		10	100		13		0	1	1	1	1	1	0	0.714286	0	0	0	0	0	0	0	0
15.3895	Chica	159	48	18.9866	24	26	190	7	17.1	-0.07	0	1	1	0	0	0	0	0.285714	0	0	3	0	0	1	1	0.714286
15.3968	Chica										0	0	0	0	0	0	2	0.285714	2	1	2	1	1	1	1	1.28571
15.3996	Chica	155	54	22.4766	16	20	129	2.5	19.1	-0.99	0	0	0	0	0	0	0	0	0	0	0	0	0	0	0	0
15.3996	Chica	162	45.3	17.2611	21	14	140	4.5	19.4	-0.6	0	0	0	0	0	1	0	0.142857	0	0	0	0	0	0	0	0
15.4004	Chica	168	49.8	17.6446	27	15	152	5	30.2	0.28
15.4023	Chica	161	63.9	24.6518	17	18	153	3.5	27.9	-0.35	0	0	0	0	0	0	0	0	0	0	0	0	0	0	0	0
15.4105	Chica	164	62.4	23.2005		26	130	4	29
15.4132	Chica	165	63.7	23.3976	20	40	101	3.5	22.2	-0.9	1	1	1	0	0	0	0	0.428571	0	0	0	0	0	0	0	0
15.4132	Chica	157	60.8	24.6663	16	20	150	4	20.1	-0.75	0	1	0	0	0	0	0	0.142857	0	0	0	0	0	0	0	0
15.4141	Chica	153	72.5	30.971	21	38	110	3.5	22.2	-0.76	0	0	1	0	0	0	0	0.142857	0	1	1	0	0	1	0	0.428571
15.4242	Chica	161	56.4	21.7584	25	31	140	3	28.7	0	1	1	1	0	0	0	1	0.571429	1	1	0	0	0	0	0	0.285714
15.4242	Chica	158	46.3	18.5467	24	41	170	3.5	21.3	-0.08	1	1	1	1	0	2	1	1	0	0	0	0	0	0	0	0
15.4251	Chica	164	56.1	20.8581	26	9	195	7	24	0.37	0	0	0	0	0	0	1	0.142857	0	1	0	1	0	0	0	0.285714
15.4461	Chica	184	81.6	24.1021	23	15	175	5.5	43.2	0.81	0	0	0	0	1	0	0	0.142857	0	0	0	0	0	0	0	0
15.4497	Chica	164	75.1	27.9224	23	19	120	3.5	22.2	-0.56	0	0	0	0	0	0	0	0	0	1	0	0	0	0	0	0.142857
15.4516	Chica	159	60.1	23.7728	22	24	165	5	31	0.16	0	1	1	0	0	1	1	0.571429	0	1	0	0	0	0	0	0.142857
15.4598	Chica	164	53.5	19.8914	24	23	171	6	20.9	-0.09	0	0	0	0	0	0	0	0	0	0	0	0	0	0	0	0
15.4598	Chica	170	50.3	17.4048	24	23	158	7.5	22.4	-0.15	0	0	1	0	0	0	0	0.142857	0	0	0	0	0	0	0	0
15.4652	Chica	166	97	35.201	23	19	115		29.4	-0.31	1	1	1	0	1	0	1	0.714286	0	1	0	0	0	0	0	0.142857
15.4661	Chica	165	56.9	20.8999	16	10	185	7	26.9	-0.15	0	2	2	1	0	0	0	0.714286	0	0	0	0	0	0	0	0
15.468	Chica	167	73	26.1752	28	29	120	3	25.4	-0.16	0	0	0	0	0	0	1	0.142857	0	0	0	0	0	0	1	0.142857
15.4762	Chica										0	1	2	0	0	0	1	0.571429	0	0	0	0	0	0	1	0.142857
15.4771	Chica	156	42.7	17.546	20	17	131	3.5	18.6	-0.77	0	1	3	0	0	0	2	0.857143	1	1	1	0	0	0	1	0.571429
15.4825	Chica
15.4844	Chica	166	61.9	22.4633	27	24	69	6	31.3	-0.43	0	3	4	1	1	4	4	2.42857	1	1	4	0	0	0	0	0.857143
15.499	Chica	164	68.5	25.4685	15	27	127	3	20.4	-1	0	0	1	0	0	0	0	0.142857	0	4	1	0	0	1	1	1
15.5017	Chica	161	62.5	24.1117	26	15	139	4	21.8	-0.24	0	0	0	0	0	0	0	0	0	1	1	0	0	0	0	0.285714
15.5017	Chica	171	59.3	20.2797	24	11	114	4.5	18.7	-0.71	0	1	1	0	0	0	0	0.285714	0	0	0	0	0	0	0	0
15.5063	Chica	165	55.4	20.3489	24	34		6	24		0	0	0	0	1	0	4	0.714286	1	4	4	4	4	4	2	3.28571
15.5172	Chica	164	60.2	22.3825	23	35	125	6	21.9	-0.53	0	0	0	0	0	4	0	0.571429	0	0	0	0	0	0	0	0
15.5181	Chica	169	56.6	19.8172	30	2	190	7	25.2	0.59	0	0	0	0	0	0	1	0.142857	0	0	1	0	1	0	0	0.285714
15.5209	Chica	157	41.3	16.7552	17	8	160	3	14.3	-0.85	2	2	1	0	0	4	1	1.42857	0	0	0	0	0	0	0	0
15.5264	Chica	172	62.9	21.2615	18	14	120	2.5	18.5	-0.98	0	0	1	1	0	0	1	0.428571	1	1	0	0	0	0	0	0.285714
15.5337	Chica	164	63.8	23.721	21	30	121	6	16.8	-0.88	0	0	0	0	0	0	0	0	0	0	0	0	0	0	0	0
15.5364	Chica	165	51.6	18.9532	27	23	150	3.5	24.6	0.03	0	0	0	0	0	0	1	0.142857	0	1	0	0	0	1	0	0.285714
15.5364	Chica										0	1	2	0	0	0	1	0.571429	0	0	0	0	0	0	1	0.142857
15.5391	Chica	161	55.8	21.5269	22	26		4			0	1	0	0	0	1	1	0.428571	0	0	0	0	0	0	0	0
15.5501	Chica	162	52.7	20.0808	22	19	147	4	26.9	-0.17	0	0	0	0	0	0	0	0	0	0	0	0	0	0	0	0
15.5537	Chica	167	112	40.1592					34.5		0	0	0	0	0	1	0	0.142857	0	0	0	0	0	0	0	0
15.5556	Chica	162	47.8	18.2137	22	14	162	5.5	23.9	-0.16	0	0	0	0	0	0	0	0	0	0	0	0	0	0	0	0
15.5619	Chica	160	68.9	26.9141	27	14	116	3	22.4	-0.37	2	1	1	0	0	0	3	1	0	1	0	1	0	0	0	0.285714
15.5619	Chica	175	58.7	19.1673	27	14	160	4	25.9	0.18	0	1	1	0	0	0	0	0.285714	0	0	0	0	1	0	0	0.142857
15.5647	Chica
15.5747	Chica	162	58.4	22.2527	23	30	145	4.5	25.4	-0.2	0	0	0	0	0	0	0	0	0	0	1	0	0	0	0	0.142857
15.5747	Chica	168	60	21.2585	20	23	116	6	20.3	-0.84	0	1	0	0	0	0	1	0.285714	0	0	0	0	0	0	0	0
15.5784	Chica	159	50.6	20.015	25	18	198	7	26.6	0.45	0	0	1	0	0	0	1	0.285714	0	3	3	0	0	1	1	1.14286
15.5829	Chica	167	73.9	26.4979	21	23	155	2.5	37.2	0.27	0	0	0	0	0	0	0	0	0	1	0	0	0	1	0	0.285714
15.5857	Chica	178	64.9	20.4835	22	23	155	2.5	28.5	-0.03	0	0	0	0	0	1	0	0.142857	0	0	0	0	0	0	0	0
15.5857	Chica	177	86	27.4506	20	20	150	4	30.4	-0.11	0	0	1	0	0	0	1	0.285714	0	0	0	0	0	1	0	0.142857
15.5866	Chica	164	52	19.3337	26	13	155	4.3	18.2	-0.24	0	1	1	0	0	2	1	0.714286	4	4	4	2	0	0	0	2
15.5893	Chica	144	35.9	17.3129	26	2	155	4.3	15.9	-0.34	0	0	0	0	1	0	0	0.142857	0	0	0	0	0	0	0	0
15.5975	Chica	159	48.9	19.3426	24	5	180	4	18.7	-0.1	0	0	0	0	0	1	0	0.142857	0	0	0	0	0	1	0	0.142857
15.6003	Chica	160	52	20.3125	30	2	160	4	22.2	0.19	0	1	1	0	0	0	1	0.428571	1	1	3	0	0	0	1	0.857143
15.6057	Chica	167	62.4	22.3744	20	23	170	3	24.8	-0.16	0	1	1	0	0	0	0	0.285714	0	0	0	0	0	0	0	0
15.6076	Chica	159	72.3	28.5986	22	27	150	3	24.2	-0.26	0	0	0	0	0	0	0	0	0	0	0	0	0	0	0	0
15.6076	Chica										1	1	1	1	1	1	2	1.14286	0	1	0	0	1	0	0	0.285714
15.6158	Chica	156	39.8	16.3544	27	19		7.5	17.4		0	0	1	0	1	0	0	0.285714	0	0	0	0	0	0	0	0
15.624	Chica	161	48.1	18.5564		25	135	4	17.1
15.624	Chica	169	59.1	20.6926	26	33	142	7.5	23.4	-0.15	0	0	0	0	0	0	0	0	0	0	0	0	0	0	0	0
15.6267	Chica	162	52	19.8141	17	19			12.2		1	2	2	0	1	0	2	1.14286	0	1	1	0	0	0	0	0.285714
15.6386	Chica				15		115				0	0	0	0	0	0	0	0	1	0	0	0	0	0	0	0.142857
15.6441	Chica	169	77.1	26.9949	17	0	135	1.1	19.9	-0.84	0	0	0	0	0	0	0	0	0	1	1	0	0	0	0	0.285714
15.6513	Chica										0	0	0	0	0	0	0	0	0	0	0	0	0	0	0	0
15.6568	Chica	168	66.5	23.5615	19	32	148	4	29.4	-0.22	0	0	0	0	1	1	0	0.285714	0	1	1	0	0	1	0	0.428571
15.6769	Chica	174	106	35.0112	18	10	117	2	24.2	-0.78	0	2	2	0	0	0	0	0.571429	0	1	1	0	0	0	0	0.285714
15.6769	Chica	159	53.6	21.2017	28	22	112	2.5	16.8	-0.59	4	4	4	4	3	3	4	3.71429	1	2	2	0	1	0	0	0.857143
15.6814	Chica	160	47.4	18.5156		19	140	5	23.3
15.6879	Chica	164	64.2	23.8697	26	17	175	4	26.9	0.3	0	0	1	0	0	1	1	0.428571	0	4	1	0	0	0	0	0.714286
15.6951	Chica	154	46.5	19.607	29	25		7.5	23.1		0	3	3	0	1	4	2	1.85714	0	1	0	0	0	0	0	0.142857
15.7006	Chica	169	58.9	20.6225	28	30	165	6	31.3	0.5	0	0	1	0	0	1	2	0.571429	0	2	4	0	0	1	2	1.28571
15.7061	Chica	149	59.1	26.6204	24	35	150	4	23.4	-0.18	0	0	0	0	0	0	0	0	0	0	0	0	0	0	0	0
15.707	Chica	172	64.6	21.8361	25	5	160	5.3	31.8	0.31	0	0	0	0	0	0	0	0	0	0	0	0	0	0	0	0
15.707	Chica	156	59.3	24.3672	13	8	122
15.7143	Chica	175	65.9	21.5184	19	31	162	4	24.6	-0.29	0	0	0	0	0	0	0	0	0	0	0	0	0	0	0	0
15.7225	Chica	167	68.7	24.6334	32	23	156	2	27.8	0.49	4	4	4	4	4	4	2	3.71429	1	1	0	0	0	0	0	0.285714
15.7334	Chica	163	52.2	19.647	15	18	180	5	20.6	-0.51	0	2	1	0	0	3	1	1	0	1	0	0	0	0	0	0.142857
15.7444	Chica	160	68.2	26.6406	16	33	150	5.5	29.1	-0.38	0	1	0	0	0	0	0	0.142857	0	0	0	0	0	0	0	0
15.7536	Chica					15
15.7581	Chica	151	51.1	22.4113	29	34	180	5.5	24.6	0.42	0	0	0	0	0	0	0	0	0	0	0	0	0	0	0	0
15.7608	Chica	169	59.6	20.8676	15	15	125	3.5	27.2	-0.74	0	0	0	0	0	0	0	0	0	0	0	0	0	0	0	0
15.7608	Chica										0	0	1	0	0	1	0	0.285714	0	0	0	0	0	0	0	0
15.7618	Chica	155	58.3	24.2664	25	25	170	3.3	19.9	-0.09	0	1	1	0	0	0	0	0.285714	0	1	1	0	0	0	0	0.285714
15.7663	Chica	155	51.5	21.436	31	28	160	4.5	26.1	0.4	0	0	0	0	0	0	0	0	0	0	0	0	0	0	0	0
15.7673	Chica	163	49.1	18.4802	30	11	174	7	21.9	0.3	0	0	1	0	0	0	0	0.142857	0	0	0	0	0	0	0	0
15.769	Chica										0	0	0	0	0	0	0	0	0	0	0	0	0	0	0	0
15.77	Chica	166	44.6	16.1852	27	6	154	5.25	20.9	-0.09	1	2	2	0	0	3	1	1.28571	0	1	2	0	0	0	0	0.428571
15.77	Chica	168	48.2	17.0777	30	34	210	7.3	22.7	0.67	2	1	0	0	0	0	0	0.428571	0	0	1	0	0	0	0	0.142857
15.7782	Chica	165	64.5	23.6915	32	6	195	7.3	21.9	0.6	0	0	2	0	0	1	2	0.714286	0	0	0	0	0	0	0	0
15.78	Chica	169	64.4	22.5482	26	28	110	7	23.1	-0.45	0	0	0	0	0	0	0	0	0	0	0	0	0	0	0	0
15.7827	Chica	163	51.6	19.4211	20	31	131	3.5	21.2	-0.66	0	0	0	0	0	0	0	0	0	1	1	0	0	0	0	0.285714
15.7837	Chica	166	62.4	22.6448	23	9	147	3.5	27.2	-0.11	0	0	1	0	0	2	1	0.571429	0	0	0	0	0	0	0	0
15.7837	Chica	156	46.7	19.1897	30	20	130	4	20.3	-0.17	0	1	1	0	0	0	2	0.571429	0	0	0	0	0	0	0	0
15.7882	Chica	159	55.8	22.0719	27	9	115	1.5	18.4	-0.55	0	2	2	2	0	1	1	1.14286	0	1	0	0	0	0	0	0.142857
15.7909	Chica	168	50	17.7154	27	21	130	4.5	24.3	-0.16	0	1	0	0	0	0	0	0.142857	0	0	0	0	0	0	0	0
15.7991	Chica	171	67.9	23.2208	27	15		6	26.7		0	1	1	0	0	1	1	0.571429	0	0	0	0	0	0	0	0
15.8001	Chica	156	51.5	21.1621	29	16	203	10	21.9	0.51	1	2	1	1	0	1	1	1	1	1	2	1	0	0	0	0.714286
15.8046	Chica										0	0	0	0	0	4	0	0.571429	1	0	0	0	0	0	0	0.142857
15.8111	Chica	161	48.5	18.7107	31	11	181	7	22.8	0.46	0	0	1	0	0	0	0	0.142857	0	0	0	0	0	0	0	0
15.8183	Chica	160	59.9	23.3984	22	26	110	4	25.2	-0.58	0	1	1	0	0	1	0	0.428571	0	0	0	0	0	0	0	0
15.821	Chica	162	44.5	16.9563	25	36	174	6	20.9	-0.01	0	0	0	0	0	0	1	0.142857	0	0	0	0	0	0	0	0
15.8248	Chica	160	59.6	23.2812	27	30	138	4	22.5	-0.17	0	0	1	0	0	0	1	0.285714	0	0	0	0	0	0	0	0
15.8292	Chica	162	58.8	22.4051	22	15	146	4	27.2	-0.17	0	0	1	0	0	1	0	0.285714	0	0	0	0	0	0	0	0
15.8385	Chica
15.8439	Chica	152	51.2	22.1607	27	24	150	5.5	20.3	-0.15	0	1	0	0	0	0	0	0.142857	0	4	4	0	0	1	2	1.57143
15.8484	Chica										0	0	0	0	0	0	0	0	1	1	0	0	0	0	0	0.285714
15.8631	Chica	156	49.2	20.217	25	10	150	5	17.1	-0.39	0	0	0	0	0	0	0	0	0	0	0	0	0	0	0	0
15.8648	Chica	152	58	25.1039	24	18	90	3.5	15.6	-1.05	0	0	0	0	0	1	0	0.142857	0	0	0	0	0	0	0	0
15.8648	Chica	166	43.6	15.8223	24	23	137	7	21.5	-0.38	0	0	0	0	0	1	0	0.142857	0	0	0	0	0	0	0	0
15.8675	Chica	158	55.6	22.2721	23	26	110	4	21	-0.7	0	1	1	0	0	0	1	0.428571	0	1	0	0	0	0	0	0.142857
15.8741	Chica	167	66.8	23.9521	22	15	123	3	25.7	-0.44	0	0	0	0	0	0	0	0	0	0	0	0	0	0	0	0
15.884	Chica	164	63.5	23.6095	30	27	105	5.5	26.9	-0.12	0	1	1	0	0	3	0	0.714286	0	0	0	0	0	0	0	0
15.885	Chica	168	52.3	18.5303	13	19	141	4.1	28.1	-0.67	0	0	0	0	0	1	0	0.142857	0	0	0	0	0	0	1	0.142857
15.8922	Chica	162	95.5	17.7627	21	21	140	2.5	32.4	-0.06	0	1	1	0	0	0	1	0.428571	0	2	2	0	0	0	1	0.714286
15.9042	Chica	158	72.1	28.8816	18	28	159		30.3	-0.14	0	0	0	0	0	0	0	0	0	1	0	0	0	0	0	0.142857
15.9206	Chica	151	40	17.5431	18	19	123	3	14.9	-1.11	1	4	4	1	1	1	4	2.28571	1	4	4	0	1	2	0	1.71429
15.9206	Chica	165	53.4	19.6143	29	19	185	5.5	28.7	0.63	0	1	1	0	0	1	0	0.428571	0	0	0	0	0	0	0	0
15.925	Chica	170	49.5	17.128	28	22	141	9	22.8	-0.07	0	0	0	0	1	0	0	0.142857	0	0	0	0	0	0	0	0
15.9316	Chica	152	54.1	23.4159	23	30	137	2.5	20.1	-0.49	1	2	2	1	0	4	1	1.57143	0	0	0	0	0	0	0	0
15.936	Chica										0	0	0	0	0	0	0	0	0	0	0	0	0	0	0	0
15.9442	Chica	152	45.7	19.7801		29	145	4.5	26
15.9452	Chica	163	52.4	19.7222	15	18	160	4.55	23.9	-0.56	0	1	1	0	0	0	1	0.428571	0	0	1	0	0	0	0	0.142857
15.9496	Chica	172	71.1	24.0333	23	16	110	4	30.3	-0.32	0	1	0	0	0	0	1	0.285714	0	1	0	0	0	1	1	0.428571
15.9562	Chica	165	54.1	19.8714	20	23	127	2	20.6	-0.72	0	0	2	0	0	1	1	0.571429	1	1	1	0	0	0	0	0.428571
15.9781	Chica	167	63.5	22.7688	21	0	140	8.1	24	-0.41	0	0	0	0	0	0	0	0	0	0	0	0	0	1	0	0.142857
15.9825	Chica	167	56.4	20.223	23	38	140	8	26.4	-0.2	0	0	0	0	0	1	1	0.285714	0	0	0	0	0	0	0	0
16.0153	Chica	152	44.5	19.2607	24	31	145	3.5	23.9	-0.21	0	0	0	0	0	0	0	0	0	0	0	0	0	0	0	0
16.0181	Chica	167	56	20.0796	20	21	180	3.5	29.4	0.13	0	0	0	0	0	0	0	0	0	0	0	0	0	0	0	0
16.0219	Chica	156	69.2	28.4352	29	32	107	4	23.4	-0.3	1	4	2	0	0	1	2	1.42857	0	2	1	0	0	1	0	0.571429
16.0427	Chica										0	0	0	0	0	0	0	0	0	0	0	0	0	0	0	0
16.0536	Chica	165	51.3	18.843		28	132	6	23.7
16.0548	Chica	153	43.2	18.4544	20	22	140	4.1	15.6	-0.81	0	0	0	0	0	0	0	0	0	0	0	0	0	0	0	0
16.063	Chica	158	51.6	20.6698	26	30	155	3	23.4	-0.03	0	1	1	0	1	1	1	0.714286	0	1	0	0	0	0	0	0.142857
16.0657	Chica	157	55.9	22.6784	23	21	110	2.5	24.9	-0.54	0	1	1	0	0	0	1	0.428571	1	1	1	0	0	0	0	0.428571
16.0739	Chica	163	45.2	17.0123	20	25	168	5.35	21.2	-0.32	0	1	1	0	0	0	0	0.285714	0	0	0	0	0	0	0	0
16.0739	Chica	156	40.3	16.5598	20	32	155	5.4	15.9	-0.66	0	0	0	0	0	0	0	0	0	0	1	0	0	0	1	0.285714
16.0755	Chica	151	44.9	19.6921	16	27	145	3	24.6	-0.61	1	2	0	0	0	1	0	0.571429	0	0	1	0	0	0	0	0.142857
16.0755	Chica	165	56.9	20.8999	22	25	160	6	32.1	0.16	0	0	0	0	0	0	1	0.142857	0	0	0	0	0	0	0	0
16.0821	Chica	159	57.7	22.8235	28	14	115	4.5	23	-0.3	0	0	1	0	0	0	1	0.285714	1	1	1	0	0	0	0	0.428571
16.0931	Chica	160	45.3	17.6953	26	15	120	3	19.6	-0.51	0	1	1	0	0	0	1	0.428571	1	1	1	0	0	0	1	0.571429
16.0931	Chica	161	73.3	28.2782	15	23	140	4.55	24.6	-0.71	0	1	1	0	1	0	0	0.428571	0	1	1	0	0	1	1	0.571429
16.0958	Chica	165	86.8	31.8825	22	35	120	3.75	23.6	-0.56	0	0	0	0	0	4	0	0.571429	0	1	0	0	0	0	0	0.142857
16.0974	Chica	170	79.8	27.6125	18	23		3.5	26.1		1	2	2	0	0	1	0	0.857143	0	0	0	0	0	0	0	0
16.1029	Chica	168	58	20.5499	25	25	122	3.5	23.7	-0.37	0	0	0	0	0	0	0	0	0	0	0	0	0	0	0	0
16.1084	Chica	168	69.4	24.589	27	23	98	5.5	26.7	-0.36	0	0	0	0	0	0	0	0	0	0	0	0	0	0	0	0
16.1111	Chica	163	59.5	22.3945	30	24	154	7.5	28.1	0.38	0	0	0	0	0	0	0	0	0	0	0	0	0	0	0	0
16.1166	Chica	159	74.5	29.4688	20	15		2	17.1		0	0	2	0	0	1	0	0.428571	0	0	0	0	0	0	0	0
16.1177	Chica	154	51.3	21.631	15	11	126	6.25	18.1	-1.11	0	0	0	0	0	0	1	0.142857	0	0	1	0	0	0	0	0.142857
16.1248	Chica	159	55.2	21.8346	29	34	75	7.5	25.4	-0.52	0	1	1	1	0	0	1	0.571429	0	1	1	0	0	0	0	0.285714
16.1522	Chica	160	50.8	19.8438	27	38	170	6	24	0.19	1	2	1	1	1	0	1	1	0	0	0	0	0	0	0	0
16.1549	Chica	170	73.4	25.3979	24	28	150	2	28.2	0.02	0	1	2	1	0	0	1	0.714286	0	0	0	0	0	1	0	0.142857
16.1561	Chica				21	20	170	6.3
16.1631	Chica										0	1	1	0	0	0	4	0.857143	0	3	4	4	0	1	1	1.85714
16.1713	Chica	180	73.1	22.5617	27	22	145	7	25.2	0.01	0	0	0	0	0	0	0	0	0	0	0	0	0	0	0	0
16.1725	Chica	152	48	20.7756	18	17	133	3	19.3	-0.83	0	0	0	0	0	0	1	0.142857	0	0	0	0	0	0	0	0
16.1795	Chica	154	53.6	22.6008	24	21	122	4.5	20.9	-0.54	0	1	1	0	0	0	0	0.285714	0	1	0	0	0	0	0	0.142857
16.1862	Chica	151	48.8	21.4026	20	9	161	2.5	21.3	-0.38	0	0	0	0	0	0	0	0	0	0	0	0	0	0	0	0
16.1889	Chica	172	47.1	15.9208			124	2.13	17.2		0	0	1	0	0	2	0	0.428571	0	0	0	0	0	0	0	0
16.1905	Chica	165	89.8	32.9844	23	26	98	3	26.3	-0.59	1	1	3	0	0	1	1	1	0	0	0	0	0	0	0	0
16.2081	Chica	165	67.5	24.7934	20	4	130	3	25.4	-0.5	1	1	4	0	0	0	4	1.42857	0	1	1	0	1	0	0	0.428571
16.2327	Chica	159	51.2	20.2524	7		132	1.45	22.1	-1.32	0	0	0	0	0	0	0	0	0	0	0	0	0	0	0	0
16.2355	Chica	168	66	23.3844	27	20	150	4	21.9	-0.08	0	4	1	0	0	0	0	0.714286	0	1	1	0	0	0	0	0.285714
16.237	Chica										0	0	0	0	0	0	0	0	0	0	0	0	0	0	0	0
16.2437	Chica	151	47.4	20.7886	16	34	122		21.5	-0.95	0	0	1	0	0	0	0	0.142857	0	0	0	0	0	0	0	0
16.2546	Chica	166	70.2	25.4754	19	9	130	3.3	26	-0.53	1	3	4	3	0	2	4	2.42857	1	1	0	1	0	0	0	0.428571
16.2601	Chica	156	46.7	19.1897	15	15	133	3.3	21.6	-0.9	4	4	0	1	1	0	0	1.42857	1	0	0	0	0	0	0	0.142857
16.2698	Chica	163	50.3	18.9318	24	24	131	4.5	24.2	-0.32	0	0	0	0	0	0	0	0	0	0	0	0	0	0	0	0
16.3027	Chica	159	61.1	24.1683	21	23	140	2	23.1	-0.45	0	0	0	0	0	0	1	0.142857	0	0	1	0	0	0	0	0.142857
16.3039	Chica	175	75	24.4898	23	15	120	2.5	29.1	-0.27	1	1	0	1	1	0	0	0.571429	0	0	0	0	0	0	0	0
16.3395	Chica	171	60.1	20.5533	21	5	110	2.3	17.8	-0.94	0	1	1	0	0	1	0	0.428571	0	0	0	0	0	0	0	0
16.3477	Chica	148	54.2	24.7443	16	31	125	3.15	16.9	-1.11	1	1	2	0	0	0	0	0.571429	0	0	0	0	0	0	0	0
16.3559	Chica	159	61.9	24.4848	16	24	129	2.36	21.6	-0.88	0	0	0	0	0	0	0	0	0	0	1	0	0	1	0	0.285714
16.3587	Chica	172	65.2	22.0389	20	35	140	4	28.8	-0.27	1	2	1	0	0	1	1	0.857143	1	1	1	0	0	0	0	0.428571
16.3629	Chica										1	0	0	0	0	0	0	0.142857	0	0	0	0	0	0	0	0
16.3629	Chica										0	0	0	0	0	0	0	0	0	0	0	0	0	0	0	0
16.3684	Chica	157	54.8	22.2321	23	19	120	3.5	28.1	-0.32	0	0	2	0	0	2	2	0.857143	0	1	0	0	0	0	0	0.142857
16.3723	Chica	169	70	24.5089		26	169	3.42	26.3
16.3751	Chica	151	58.8	25.7883					14.1
16.3778	Chica	159	54.8	21.6764	26	21	170	6	28.8	0.33
16.3985	Chica										0	1	0	0	0	0	1	0.285714	0	1	0	0	0	0	0	0.142857
16.4176	Chica	158	66.6	26.6784	22	20	120	3	24.5	-0.52	0	1	4	0	0	0	1	0.857143	1	1	0	1	0	0	0	0.428571
16.4505	Chica										1	1	1	0	0	1	1	0.714286	3	4	0	1	0	0	0	1.14286
16.4545	Chica	174	72.5	23.9464	19	26	197	10.05	40.3	0.68	0	1	4	0	0	3	3	1.57143	0	1	3	0	0	0	1	0.714286
16.4682	Chica	158	51.2	20.5095	18	27	186	5.32	24.5	-0.13	4	3	3	1	1	1	1	2	1	0	1	0	0	0	0	0.285714
16.4764	Chica	160	62.4	24.375	21	37	137	4.1	22.1	-0.52	1	1	1	1	0	1	1	0.857143	0	0	0	0	0	0	1	0.142857
16.4928	Chica				25	28	130	3.3			0	0	0	0	0	0	0	0	0	0	0	0	0	0	0	0
16.4983	Chica	162	53.9	20.538	28	21	182	6	26.1	0.44	1	2	2	1	1	2	2	1.57143	0	1	1	0	0	0	1	0.428571
16.5107	Chica	158	56	22.4323	20	21	150	3	26.7	-0.26	0	0	1	0	0	0	0	0.142857	0	0	0	0	0	0	0	0
16.5107	Chica										0	0	1	0	0	0	1	0.285714	0	0	0	0	0	0	0	0
16.5175	Chica	168	60.4	21.4002	21	34	165	5.2	23.4	-0.21	0	0	0	0	0	0	0	0	0	0	0	0	0	0	0	0
16.5202	Chica	173	62.4	20.8493	16	23	138	3	27.3	-0.56	0	3	4	0	0	1	4	1.71429	0	0	0	0	0	0	0	0
16.5216	Chica	170	92	31.8339	17	7			22.8
16.5216	Chica										0	0	0	0	0	0	1	0.142857	0	0	0	0	0	0	0	0
16.5339	Chica	169	60.5	21.1827	26	16	160		23.1	0.01	0	0	1	0	0	0	1	0.285714	1	1	1	0	0	0	1	0.571429
16.549	Chica										0	0	0	0	0	1	1	0.285714	0	0	0	0	0	0	0	0
16.5517	Chica										0	0	0	0	0	0	0	0	0	0	0	0	0	0	0	0
16.5517	Chica										0	0	0	0	0	0	0	0	0	0	0	0	0	0	0	0
16.5859	Chica	162	84.2	32.0835	19	20	128	3.23	31.9	-0.3	0	1	1	0	0	0	0	0.285714	0	1	1	0	1	1	1	0.714286
16.6037	Chica	164	46.6	17.326	19	22	160	4.5	23.4	-0.36	0	0	0	0	0	0	0	0	0	0	0	0	0	0	0	0
16.6051	Chica	161	54.4	20.9868	28	26	180	5	24.3	0.35	0	1	1	0	0	1	1	0.571429	0	0	0	0	0	0	0	0
16.6105	Chica	161	51.9	20.0224	13	13	170	3.42	30.4	-0.3	0	0	0	0	0	1	1	0.285714	0	1	1	0	0	0	0	0.285714
16.6133	Chica	164	51.6	19.185	24	29	177		31.6	0.41	0	1	1	0	0	0	0	0.285714	0	0	0	0	0	0	0	0
16.616	Chica	165	52.5	19.2837	10	32	168	4.05	27.8	-0.59	2	1	1	1	1	1	1	1.14286	0	0	0	0	0	0	0	0
16.6338	Chica	168	49.9	17.68	22	4	130	4	22.1	-0.53	0	0	0	0	0	0	0	0	0	0	0	0	0	0	0	0
16.6352	Chica	160	58.5	22.8516	15	31	125	4.1	15.6	-1.22	0	1	0	0	0	0	0	0.142857	0	0	1	0	0	0	0	0.142857
16.6407	Chica	159	66.5	26.3043	21	21	167	4	27	-0.04	0	2	1	0	0	0	1	0.571429	0	1	1	0	0	0	1	0.428571
16.6448	Chica	163	55.5	20.889	20	26	170	5.5	22.4	-0.26	0	1	1	0	0	0	1	0.428571	0	0	0	0	0	0	0	0
16.6461	Chica	161	58	22.3757	22		147	4	20.1	-0.45	0	0	0	0	0	0	1	0.142857	0	0	0	0	0	0	0	0
16.6612	Chica	157	74	30.0215	22	26		5.5	26.3		0	1	0	0	0	1	2	0.571429	1	1	1	0	0	0	1	0.571429
16.6612	Chica										0	1	1	0	0	0	1	0.428571	0	0	0	0	0	0	0	0
16.6626	Chica	167	50.3	18.0358	17	10	165	6.3	24.9	-0.36	0	0	0	0	0	0	0	0	0	0	0	0	0	0	0	0
16.6653	Chica	158	59.8	23.9545	14	12	125	2.24	21.9	-1.01	0	1	0	0	0	0	1	0.285714	0	1	1	0	0	1	0	0.428571
16.6667	Chica	165	76.7	28.1726	17	23	130	2.5	32.5	-0.37	0	0	0	0	0	0	0	0	0	0	0	0	0	0	0	0
16.6667	Chica	169	74.2	25.9795	23	8	130	3.5	24.2	-0.39	0	0	0	0	0	0	0	0	0	0	0	0	0	0	0	0
16.6721	Chica	167	50.7	18.1792	25	21	180	5	26.1	0.26	0	0	0	0	0	0	0	0	0	0	0	0	0	0	0	0
16.6776	Chica	158	50.4	20.1891	20	27	150	3.5	23	-0.41	0	1	1	0	1	0	0	0.428571	0	0	1	0	0	0	0	0.142857
16.679	Chica	158	59	23.634	22	7	114	3	23.3	-0.62	1	1	2	1	0	1	1	1	0	0	0	0	0	0	0	0
16.679	Chica	172	60.8	20.5516	21	9	189	7	31.2	0.34	1	1	1	0	0	0	1	0.571429	0	1	3	0	0	0	0	0.571429
16.6817	Chica	156	47.7	19.6006	18	20	112	3.3	18.1	-1.07	0	1	1	0	0	1	1	0.571429	0	0	1	0	0	0	1	0.285714
16.6845	Chica	165	62.4	22.9201	16	30	147	5.35	26.4	-0.52	0	0	0	0	0	0	0	0	0	0	0	0	0	0	0	0
16.6899	Chica	171	64.8	22.1607					22.8
16.6927	Chica	164	46.6	17.326	15	20	140	2.35	13.7	-1.16	0	0	0	0	0	0	0	0	0	0	0	0	0	0	0	0
16.7159	Chica	161	79.1	30.5158	16	19	105	3	18.7	-1.22	0	0	0	0	0	0	0	0	0	0	0	0	0	0	0	0
16.7488	Chica										0	0	0	0	0	0	0	0	0	0	0	0	0	0	0	0
16.7502	Chica	166	65.8	23.8786	18	15	158	3.08	29.6	-0.18	0	0	1	0	0	0	1	0.285714	0	0	0	0	0	0	0	0
16.757	Chica										0	0	0	0	0	0	0	0	0	0	0	0	0	0	0	0
16.7679	Chica	159	65.8	26.0275	20	34	140	1.5	26.1	-0.38	0	0	0	0	0	0	0	0	0	0	0	0	0	0	0	0
16.7843	Chica	167	53.7	19.2549	19	16	160	3.5	20.7	-0.47	0	0	0	0	0	0	0	0	0	0	0	0	0	0	0	0
16.7967	Chica	160	49.2	19.2188	30	18	161	4.56	23.4	0.25	0	0	1	0	0	1	0	0.285714	0	0	0	0	0	0	0	0
16.8117	Chica	163	66.1	24.8786	22	26	130	4.5	26.3	-0.35	0	0	0	0	0	0	0	0	0	0	3	0	0	0	1	0.571429
16.8172	Chica				24	31		6
16.8227	Chica	160	57.1	22.3047	25	27	170	4.5	23.6	0.06	0	0	0	0	0	0	0	0	0	0	0	0	0	0	0	0
16.8309	Chica	159	64.4	25.4737	20	23	162	3.5	26.3	-0.17	0	0	0	0	0	0	1	0.142857	0	0	0	0	0	0	0	0
16.8405	Chica	171	55.5	18.9802	21	21	182	5.15	25.2	0.02	0	1	1	0	1	0	1	0.571429	0	0	0	0	0	0	0	0
16.8446	Chica	152	51.7	22.3771	25	3	262	8	20	0.76	0	0	0	0	0	0	0	0	0	0	0	0	0	0	0	0
16.8597	Chica	161	57.6	22.2214	16	23	156	7	15.7	-0.88	0	0	0	0	0	0	0	0	0	1	0	0	0	1	0	0.285714
16.861	Chica	182	61.6	18.5968	15	7	185	5.5	29.6	-0.09	0	0	1	0	0	0	1	0.285714	0	1	1	0	0	0	0	0.285714
16.8637	Chica										0	0	0	0	0	1	0	0.142857	0	0	0	0	0	0	0	0
16.8719	Chica	146	40.4	18.9529	20	24	135	1	22.5	-0.57	0	1	0	0	0	0	0	0.142857	0	1	1	0	0	0	0	0.285714
16.8774	Chica	155	57.7	24.0166	19	27	135	2.5	21.9	-0.65	1	1	3	0	0	1	1	1	0	0	0	0	0	0	0	0
16.8789	Chica	163	66.8	25.1421	20	14	125	3.4	24.2	-0.59	0	3	1	0	0	2	1	1	0	1	1	0	0	1	0	0.428571
16.8816	Chica	167	75.4	27.0357	13	26	97	2.2	19	-1.45	0	0	0	0	0	0	0	0	0	0	0	0	0	0	0	0
16.8911	Chica										0	0	0	0	0	0	1	0.142857	0	0	0	0	0	0	0	0
16.9062	Chica	156	56.6	23.2577	15	25	122	3.2	17.6	-1.17	0	0	1	0	0	0	1	0.285714	0	0	0	0	0	0	0	0
16.9102	Chica										1	1	0	0	1	1	0	0.571429	0	0	0	0	0	0	0	0
16.913	Chica	160	64.7	25.2734	21	37	165	3.5	26.4	-0.08	0	1	1	0	1	0	2	0.714286	0	1	0	0	0	0	0	0.142857
16.9172	Chica	174	67.5	22.2949	22	29	115	4.5	23	-0.63	0	0	1	0	0	0	0	0.142857	1	1	1	1	0	0	0	0.571429
16.9227	Chica	163	71.2	26.7981		21	136	3.2	25.8		0	1	3	0	0	0	1	0.714286	0	0	0	0	0	0	0	0
16.9418	Chica	156	47.6	19.5595	18	17	137	3.3	18.1	-0.85	0	0	0	0	0	0	0	0	0	0	0	0	0	0	0	0
16.9473	Chica	166	74.6	27.0721	15	16	158	3.38	23.1	-0.61	0	4	1	0	0	0	1	0.857143	0	2	1	0	0	1	0	0.571429
16.9555	Chica	165	78.1	28.6869	17	20	110		19.5	-1.09	0	1	1	0	1	0	1	0.571429	1	1	1	0	0	0	1	0.571429
17.0103	Chica	159	54.8	21.6764	20	25	178	5.15			1	1	2	0	0	1	2	1	0	1	0	0	0	0	0	0.142857
17.0294	Chica	149	46	20.7198	21	21	126	4.1			0	0	0	0	0	0	0	0	0	0	0	0	0	0	0	0
17.0431	Chica	158	52.9	21.1905	19	15	135	5			0	1	3	1	0	0	1	0.857143	0	1	1	0	0	1	0	0.428571
17.0869	Chica	165	50.6	18.5859	30	17	185	7			1	2	1	0	2	1	0	1	1	1	1	0	1	0	0	0.571429
17.1	Chica	160	103	40.2344	23	14	100	1.5	27.9	-0.51	4	4	4	3	4	4	4	3.85714	0	3	0	0	0	1	0	0.571429
17.1034	Chica				25	22	170	4.3
17.1198	Chica	155	43.3	18.0229	15	28	121	4			1	1	0	1	0	3	4	1.42857	2	2	2	3	0	0	0	1.28571
17.1253	Chica										0	0	0	0	0	0	0	0	0	0	0	0	0	0	0	0
17.128	Chica	167	72.9	26.1393	17	37	160	3.1	19.1	-0.65	0	0	0	0	0	0	0	0	0	1	0	0	0	0	0	0.142857
17.1581	Chica	167	47.8	17.1394	20	20	155	3.3			0	0	1	0	0	0	2	0.428571	0	0	0	0	0	0	0	0
17.1718	Chica	161	61.3	23.6488	31	20	171	6.12			1	1	1	0	1	0	1	0.714286	0	1	1	0	0	0	0	0.285714
17.1773	Chica	161	54.9	21.1797	23	18	160	4			0	1	1	0	0	0	2	0.571429	0	1	1	0	0	0	0	0.285714
17.1828	Chica	162	65.7	25.0343	18	26	157	6.35			0	0	0	0	0	0	0	0	0	0	0	0	0	0	0	0
17.2019	Chica	163	65.5	24.6528	25	26	131	4			0	0	1	0	0	0	1	0.285714	0	1	0	0	0	0	0	0.142857
17.2031	Chica	151	60	26.3146				3	19.6		2	4	3	2	3	2	4	2.85714	2	3	4	2	1	1	4	2.42857
17.2047	Chica	159	57.9	22.9026	29	32	195	9.43			0	0	0	0	0	0	0	0	0	0	0	0	0	0	0	0
17.2402	Chica	165	56.3	20.6795	17	0	130	3.3			0	0	0	0	0	0	0	0	0	0	1	0	0	0	0	0.142857
17.2594	Chica	165	63.2	23.214	23	28	122				0	0	0	0	0	0	0	0	0	0	0	0	0	0	0	0
17.295	Chica	160	42	16.4062	25	20	150	3.3
17.3032	Chica	150	42.3	18.8	23	21	200	4.3			0	0	1	0	0	0	1	0.285714	0	0	1	0	0	0	0	0.142857
17.3142	Chica	160	55.5	21.6797	19	23	173	4.5			0	0	0	0	0	0	0	0	0	0	0	0	0	0	0	0
17.3388	Chica										1	2	2	0	0	0	2	1	1	1	0	0	1	0	1	0.571429
17.3837	Chica										0	0	0	0	0	0	0	0	0	0	0	0	0	0	0	0
17.3837	Chica										0	0	0	0	0	0	0	0	0	0	0	0	0	0	0	0
17.3864	Chica										0	0	0	0	0	0	0	0	0	0	0	0	0	0	0	0
17.4155	Chica				21	20	155	4			1	0	0	0	0	0	0	0.142857	0	0	0	0	0	0	0	0
17.4849	Chica	154	48.9	20.619	19	25	163	5.5			0	0	0	1	0	0	0	0.142857	0	0	0	0	0	0	0	0
17.5003	Chica	160	51.2	20	23	1	149	6.25			0	1	1	0	0	0	0	0.285714	0	0	0	0	0	0	0	0
17.5277	Chica	164	57.9	21.5274	21	23	147	4			0	0	0	0	0	0	2	0.285714	0	0	1	0	0	0	0	0.142857
17.5359	Chica	166	59.8	21.7013				3.3			0	4	4	0	0	3	4	2.14286	0	3	3	0	0	0	0	0.857143
17.5424	Chica	164	56.8	21.1184	30	37	154	6			0	0	0	0	0	0	0	0	0	1	0	0	0	0	0	0.142857
17.5825	Chica	164	49.3	18.3299	25	25	135	6.3			0	0	1	0	1	0	1	0.428571	0	0	4	0	0	4	2	1.42857
17.6044	Chica	177	61.4	19.5985	34	0	220	8			0	1	4	4	4	4	4	3	4	4	4	4	4	0	2	3.14286
17.6126	Chica	156	50	20.5457	20	20	125	4.22			0	1	1	0	0	0	2	0.571429	1	2	4	0	0	0	0	1
17.6126	Chica	158	53.8	21.551	19	21	172	4.3			1	1	0	0	0	0	0	0.285714	0	0	0	0	0	0	0	0
17.6509	Chica	164	57.3	21.3043	15	18	122	3.52			0	0	0	0	0	0	0	0	0	0	0	0	0	0	0	0
17.6865	Chica	160	56.3	21.9922	27	32	141	4.45			0	0	1	0	0	0	1	0.285714	0	1	0	0	0	0	0	0.142857
17.6893	Chica	161	61.4	23.6874	16	38	139	3	20.1	-0.85	0	1	0	0	0	0	1	0.285714	0	1	0	0	0	0	0	0.142857
17.7166	Chica	164	58.9	21.8992	25	20	154	3.3			1	4	4	0	0	4	4	2.42857	0	1	1	0	0	0	0	0.285714
17.7166	Chica	170	70.4	24.3599	29	12	163	5.3			2	2	3	3	3	4	4	3	2	2	2	0	0	0	0	0.857143
17.7331	Chica	167	53.5	19.1832	24	35	160				0	0	0	0	0	0	1	0.142857	1	2	1	0	0	0	0	0.571429
17.7385	Chica				22	28	180	3.3	34.5	0.45	0	1	1	0	0	1	1	0.571429	0	0	0	0	0	0	0	0
17.7467	Chica	164	58.5	21.7504	27	34	198	8
17.7851	Chica	161	41.2	15.8944	20	20	165	3	15.1	-0.6	0	0	1	0	1	0	0	0.285714	0	2	3	0	2	0	0	1
17.7851	Chica	172	97	32.788		15					0	0	0	0	0	0	0	0	0	0	0	0	0	0	0	0
17.796	Chica	155	84.2	35.0468	15	13	118	2.2	18.5	-1.17	1	1	1	0	2	1	1	1	0	0	0	0	0	0	0	0
17.796	Chica	165	101	37.0983				2.3	32.5		0	2	1	0	0	1	0	0.571429	0	0	0	0	0	0	0	0
17.796	Chica	171	55	18.8092	28	15	180	7.3
17.8727	Chica	157	61.8	25.072	28	40	163	6.3			0	0	3	0	1	0	3	1	0	1	0	1	0	0	0	0.285714
17.9411	Chica	161	99.7	38.463	13	17	131				3	3	3	1	2	4	0	2.28571	1	2	0	0	1	3	1	1.14286
17.9603	Chica	161	72.7	28.0468	11	7	140	2.3	19	-1.16	0	3	1	0	0	4	1	1.28571	0	3	3	0	0	1	2	1.28571
17.963	Chica	157	55.4	22.4756	31	20	164	6			0	1	1	0	0	0	1	0.428571	0	1	1	0	0	0	0	0.285714
17.9713	Chica	160	70.1	27.3828	21	29	139	3.51			0	1	3	0	0	1	1	0.857143	0	0	0	0	0	1	0	0.142857
17.9767	Chica	167	60.6	21.729	21	25	182	4.15			0	0	1	0	0	2	0	0.428571	0	0	0	0	0	0	0	0
